# Supplementary material for: Identification of Influential Features for User Engagement with Wellness Content: Analysis of nyt_well Instagram Account
Source: Preprints.org preprint supplement (doi:10.20944/preprints202304.0268.v1), 2023-04-12
Supplement: Supplementary file 1 [file supplementary]

url,timestamp,type,likesCount,commentsCount,caption,,,,,,,
https://www.instagram.com/p/CmcJIRMP_3H/,12/21/2022,Image,140000,3619,"Masks are back, and, this time, they’re not just for Covid-19.

A “tripledemic” of the coronavirus, influenza and respiratory syncytial virus, known as RSV, sweeping through the U.S. has prompted several cities and counties, including New York City and Los Angeles County, to encourage people to wear a mask in indoor public spaces once again.

There have already been 13 million illnesses and 7,300 deaths from flu this season, according to estimates from the Centers for Disease Control and Prevention, and those numbers are expected to rise in the coming months.

Rates of Covid, flu and RSV “may be more intense or a little bit less intense in some parts of the country, but really, the entire country is being affected,” said Dr. William Schaffner, a professor of preventive medicine. As a result, he urged anyone who lives in a high-risk household to “put your mask back on” when in public spaces.",,,,,,,
https://www.instagram.com/p/CmZ3LBbSJUo/,12/20/2022,Image,29000,227,"The holidays can be a time for joy and togetherness, but for many people, they can also spur feelings of loneliness.

“Loneliness and aloneness are not the same thing,” said Kory Floyd, a professor of communication and the author of “The Loneliness Cure.” Loneliness is subjective. During the holidays, you can be surrounded by friends and family and feel totally isolated. Alternatively, you can be alone and feel completely at peace.

Everyone is lonely from time to time, and it makes sense that, for some, this feeling peaks around the holidays, when expectations run high, said Julianne Holt-Lunstad, a professor of psychology and neuroscience. In that sense, short bouts of loneliness are as much a part of the human experience as feeling hungry or thirsty, she said.

When loneliness hits, it is possible to help yourself through it and lighten the feeling, experts say. Read more about these five strategies at the link in our bio.",,,,,,,
https://www.instagram.com/p/CmPWQ0Dv9pE/,2022-12-16T19:01:35.000Z,Image,93000,1221,"Three viruses are sending both children and adults to emergency rooms across the U.S. this winter:  Covid is making a comeback because of new immune-evasive variants, and flu and the respiratory syncytial virus are spreading at record rates.

Most people were able to avoid flu and RSV while much of the population was taking steps to slow the spread of Covid. Now, our immunity to these viruses may have waned.

“You can get really sick, perhaps more so than you would have normally because your immune system really hasn’t been challenged as much recently,” said Dr. Priya Soni, a pediatric infectious disease specialist.

So, how do you know if you or your children have one of these viruses? We've created an interactive guide to help you identify your symptoms — and what to do to confirm and treat the various infections. (If your symptoms are severe or if you test positive for Covid, you should talk to your doctor.) Tap the link in our bio to fill out the chart.",,,,,,,
https://www.instagram.com/p/CmKoLriLlPh/,2022-12-14T23:01:58.000Z,Sidecar,40696,305,"It’s no secret that the holidays are stressful.

Last year, the American Psychiatric Association polled over 2,000 adults and found that 41% reported an increase in worrying during the season. This year, 31% said they expected to feel even more stressed than they did in 2021. The reasons are plentiful: social obligations, gift-giving woes, family tensions, travel challenges, financial concerns and more.

To help you check one thing off your list, we asked experts for their advice on holiday stressors. Swipe to read their answers and tap the link in bio to read more.

Illustrations by JooHee Yoon",,,,,,,
https://www.instagram.com/p/Cl9MFJwunay/,2022-12-09T17:46:17.000Z,Image,64325,661,"France will begin offering free condoms in pharmacies for people ages 18 to 25 starting Jan. 1, in a bid to reduce the spread of sexually transmitted diseases, President Emmanuel Macron said on Thursday.

“It’s a small revolution for prevention,” Macron said as he announced the news during a health debate with young people in western France.

The move comes as health authorities have observed an increase in sexually transmitted infections, such as chlamydia and gonorrhea, in recent years. But it is also part of a broader public health campaign that has led France to expand free access to contraception and screening for sexually transmitted diseases.

Read the full story at the link in our bio.",,,,,,,
https://www.instagram.com/p/ClywfJvrqN6/,2022-12-05T16:32:46.000Z,Image,5840,92,"Many American men are struggling to make close friends — a trend that predates the pandemic but seems to have accelerated over the past several years as loneliness levels have crept up worldwide.

In a 2021 survey of more than 2,000 adults in the U.S., less than half of the men said they were truly satisfied with how many friends they had, while 15% said they had no close friends at all — a fivefold increase since 1990. That same survey found that men were less likely than women to rely on their friends for emotional support or to share their personal feelings with them.

“I think men have a deep craving for intimacy with their friends,” said Nick Fager, a licensed mental health counselor. “And yet getting there can feel so incredibly challenging.”

Read more about male friendship and strategies for forming stronger bonds at the link in our bio.

: Eiko Ojala",,,,,,,
https://www.instagram.com/p/ClrMSvuOGtj/,2022-12-02T18:01:49.000Z,Image,133651,904,"You may be familiar with schadenfreude — the pleasure we feel when witnessing someone’s misfortune — but meet its lesser-known counterpart: freudenfreude.

Social scientists say freudenfreude is about finding joy in another person’s good fortune. The feeling is like social glue, making relationships “more intimate and enjoyable,” Catherine Chambliss, a psychology professor at Ursinus College, said. Sharing in someone else’s joy can also foster resilience, improve life satisfaction and help people cooperate during a conflict.

While the benefits are plentiful, it doesn’t always come easily. If you were raised in a family that paired winning with self-worth, Dr. Chambliss said, you might misread someone else’s victory as a personal shortcoming. And factors like mental health and overall well-being can also affect your ability to participate in someone else’s joy.

But indulging in freudenfreude is worthwhile — and there are ways to cultivate it. Tap the link in our bio to read more.",,,,,,,
https://www.instagram.com/p/ClonjsDOJgl/,2022-12-01T18:02:20.000Z,Sidecar,134656,1666,"We followed four mothers for a day as they nursed, pumped and supplemented with formula, to capture the challenges — and joys — of breastfeeding.

Eighty-three percent of babies in the U.S. start out on breast milk, but by 6 months, just 56% are breastfed. And at that stage, only a quarter drink breast milk exclusively, as the American Academy of Pediatrics recommends. That steady decline speaks to the wide-ranging challenges parents face in trying to breastfeed. Among them: It's laborious, it's time-consuming and it hinges on workplace and societal support.

To many parents, the gulf between public health goals and reality seemed to widen last summer when the AAP said it supported breastfeeding for two years or more. The organization called for guaranteed paid parental leave, and sought to destigmatize extended breastfeeding to make it more possible. But given that a majority of U.S. parents already struggled to make it to a year, some saw the suggestion as out of touch.

Swipe to see a day in the life of these moms and tap the link in bio for the full story.

Photos by @saranaomiphoto, @vanessaleroyphoto, @sarahricephoto and @yehyunkim_visual",,,,,,,
https://www.instagram.com/p/Clg6Un6vVJs/,2022-11-28T18:12:23.000Z,Image,397,2,"A $5 facial mist. The perfect water bottle. Seemingly indestructible pajamas. The editors and reporters of Well have picked their favorite items for living well — from skin care and self care to fitness and better rest.

Tap the link in bio to see our collection of affordable gifts and a few luxurious splurges.

Photo by Tony Cenicola",,,,,,,
https://www.instagram.com/p/ClUjlyRPrjF/,2022-11-23T23:02:51.000Z,Sidecar,14685,101,"What are you thankful for this year?

We asked readers to tell us, in fewer than 100 words. We received more than 1400 responses that touched on everything from large moments of gratitude, like a lifesaving drug and the birth of a child, to the joys of the mundane, like ice cream and exercise.

Swipe to read excerpts from a few of the replies we received and tap the link in bio to read more tiny gratitude stories. And feel free to share your own in the comments.

Illustrations by Daniel Salmieri",,,,,,,
https://www.instagram.com/p/ClSOXBkpyPY/,2022-11-23T01:18:52.000Z,Image,2637,30,"When Holly Burns celebrated the five-year anniversary of her breast cancer diagnosis at the beginning of November, it should have been a joyous occasion. But on the day itself, ""I felt a surprising mix of sadness and anger,"" Burns writes.

Though the last half-decade has been filled with many gifts — mercifully clear scans, more time to watch her children grow — Burns still struggles to see the bright side of her diagnosis.

For people who have endured serious health issues, “count your blessings” can feel like part of the hospital discharge plan. But convincing yourself that you should feel grateful, or beating yourself up because you don’t, can make you feel worse, Burns writes.

“The most authentic thing you can do is to tell yourself, ‘I know this is a time for giving thanks, but I’m just not feeling it,’” said Ranak B. Trivedi, a clinical health psychologist and health services researcher at Stanford University.

Read more from Burns' reflection on gratitude at the link in our bio.",,,,,,,
https://www.instagram.com/p/ClRJfpsr75A/,2022-11-22T15:17:06.000Z,Image,1097,22,"Ozempic is a medication used for treating diabetes. But you may have heard about it recently from celebrities or TikTok influencers as a weight loss drug.

The Food and Drug Administration first approved the injectable medication for treating diabetes in 2017. The agency also approved a drug with a higher dose of the active ingredient in Ozempic to treat obesity in 2021, under the brand name Wegovy. Now both are listed by the FDA as two of dozens of medications in short supply.

It’s not unusual for doctors to prescribe medications for “off-label” use, or for a different purpose from what the medication is explicitly intended for, said Dr. Disha Narang, an endocrinologist at Northwestern Medicine Lake Forest Hospital.

But Dr. Narang worries that, as the drug becomes increasingly popular, people will associate it with “vanity,” and not as a critical medication for diabetes patients.

Read more at the link in bio about what the medication can — and can’t — do, and who should take it.",,,,,,,
https://www.instagram.com/p/ClHUFk-yAhA/,2022-11-18T19:37:16.000Z,Image,1997,36,"You probably know the telltale signs of a Covid-19 infection by now. But a tiny subset of people develop uncommon symptoms — hairy tongues, purple toes, welts that sprout on their faces and more.

“Every infectious disease has common and uncommon manifestations,” said Dr. Mark Mulligan, an infectious disease specialist at NYU Langone Health. And as we learn more about the coronavirus, he said, we may better understand the underlying causes behind these infrequent symptoms — but until then, it’s largely guesswork.

Tap the link in bio to read about we know about the causes of, and potential treatments for, some of these unnerving symptoms.",,,,,,,
https://www.instagram.com/p/ClB4d-HOfv6/,2022-11-16T16:59:43.000Z,Sidecar,38163,1017,"When the Food and Drug Administration announced an Adderall shortage in October, it confirmed what many people who rely on the medication to treat ADHD had already observed.

Some patients were unable to fill their prescriptions for weeks on end, experiencing withdrawal and despair. The FDA has noted that the shortage is due in part to manufacturing delays. Rates of Adderall use in the U.S. have been rising for 20 years, and adult women, in particular, have used the medication in growing numbers.

The agency told The Times it expects the shortage to resolve in the next 30 to 60 days — but patients are left wondering how to cope without medication. In addition to withdrawal, the ADHD that prompted patients to start medication in the first place can become even more severe when they stop medication abruptly, said Anish Dube, chair of the American Psychiatric Association’s Council on Children, Adolescents and Their Families.

“It plays mind games with you,” said Meri Romedy Barbian, a senior at the University of Mississippi who missed class to drive nearly two hours to the only pharmacy she could find with Adderall. “You’re like, ‘Oh my gosh, am I really this reliant on the medicine?’”

Read more at the link in our bio. Photos by @evamarieu and @kayanaszymczak",,,,,,,
https://www.instagram.com/p/Ck3fM8frGji/,2022-11-12T16:06:32.000Z,Sidecar,168440,1060,"Panic attacks revolve around terror. Your brain is seized by fear; your body responds, and it can be hard to make sense of it all.

If you've had one — 15 to 30% of people will in their lifetime — you probably know that the attacks are not only in the mind. They often come with a constellation of symptoms, both physical and cognitive.

Swipe to see what happens in your body and how to cope if you're having a panic attack, and read more at the link in bio.

Illustrations by @danieliev",,,,,,,
https://www.instagram.com/p/CktrqeGONum/,2022-11-08T20:43:01.000Z,Image,1299,16,"Elections and anxiety often go hand in hand, even if you’re not frantically refreshing the results every five minutes.

Here are some evidence-based strategies to help you cope during this election cycle. Read more expert tips on managing stress at the link in our bio.",,,,,,,
https://www.instagram.com/p/CkjLIyvOSK8/,2022-11-04T18:46:24.000Z,Image,10600,132,"Gabrielle Blair's new book, ""Ejaculate Responsibly,"" is a clear departure from the work that fans of her blog, @DesignMom, have come to expect.

After making a name for herself as one the original mommy bloggers in the aughts, Gabrielle went viral on Twitter in 2018 with a 63-tweet thread that became the basis of her new book. She used her background as a Mormon mother of six as a selling point for the deliberately simple thesis that followed: Men need to stop putting the burden of birth control on women and stop getting them pregnant when they don’t want to be.

“I’m trying to shift the conversation, shift the abortion conversations to prevention,” she told The Times.

Read more about her trajectory from blogger to reproduction rights activist at the link in bio.

Photo by @matthew_avignone",,,,,,,
https://www.instagram.com/p/CkenpzMrDgl/,2022-11-03T00:19:22.000Z,Sidecar,6507,51,"A good night’s sleep can make us more empathetic, more creative, better parents and better partners. But for many of us, getting to bed is easier said than done.

We asked Aric Prather, a psychologist at the University of California, San Francisco and author of the new book “The Sleep Prescription” for some simple steps we can take throughout the day and night to get better rest.

“It’s not something you do,” Dr. Prather said. “It’s something that comes to you.”

Swipe to read his science-based tips for sounder sleep and tap the link in bio to read more.",,,,,,,
https://www.instagram.com/p/CkY0ElpOz8D/,2022-10-31T18:12:26.000Z,Sidecar,4551,21,"Happy Halloween to all, no matter your level of enthusiasm  Illustrated by @lianafinck for The New York Times.",,,,,,,
https://www.instagram.com/p/CkRCR9JO5b6/,2022-10-28T17:42:41.000Z,Image,907,26,"At Well, we believe a cornerstone of building healthy habits is finding those you enjoy. That’s why we run #whynottry — a series to answer questions about popular activities for beginners. Today’s offering: Pilates.

❔What is Pilates?
An exercise style that encourages participants to focus on breathing and cultivate a mind-body connection, paying attention to how movement stems from the core. 

❔Who can benefit?
Everyone. Really. Pilates can be tailored to a spectrum of fitness goals, ages and abilities. Physicians and P.T.s often recommend it as a path to rehabilitation after injury. And it can benefit women who are pregnant or postpartum by safely strengthening the core and conditioning the pelvis.

❔What can’t it do?
Traditional Pilates is not a cardiovascular workout. It isn’t equivalent to lifting heavy weights. It’s also not the best workout for catching up with a friend or watching TV. 

So is it right for you? And if so, what style? Tap the link in our bio to find out more.

Reporting by @daniellefriedmanwrites. Photo by @melissaschriek",,,,,,,
https://www.instagram.com/p/CkOhc2DO79M/,2022-10-27T18:17:19.000Z,Image,1437,10,"As we enter our third pandemic holiday season, some doctors are fearing a seasonal surge in Covid. But with a bit of advanced planning, experts say that family gatherings can be safe this year, and resemble something like pre-pandemic times.

“We have the tools for a normal life,” said Dr. Peter Chin-Hong, an infectious disease specialist at the University of California, San Francisco. “We just have to use them.”

Learn more about what keep in mind as you map out your plans for the holidays at the link in our bio.",,,,,,,
https://www.instagram.com/p/CkLdb_5rrjH/,2022-10-26T13:44:32.000Z,Sidecar,14587,94,"Feeling uprooted is something many immigrants are familiar with, split between the here and the back there, between the push to assimilate and the pull to preserve parts of themselves and their culture. Though it is not well-known, that specific kind of grief has a name: cultural bereavement.

Coined in 1991 by Dr. Maurice Eisenbruch, an Australian psychiatrist and professor, it is more complex than culture shock — it often manifests as amorphous depression or anxiety without an obvious cause, experts said.

“I just assumed that there was always going to be a part of me that felt alone and isolated. I would feel ashamed because I should know more about my family or my history,” said Sahaj Kaur Kohli, who received a master’s degree in clinical mental health counseling and created @browngirltherapy.

Read more about this complex form of grief at the link in our bio. Reporting by @Alisha___g. Photos by @theotherchrislee @dontgabalot and @theostroomer",,,,,,,
https://www.instagram.com/p/CkBaBxqLUOb/,2022-10-22T16:02:20.000Z,Sidecar,24517,284,"If the start of cooler months means the beginning of feelings of fatigue, lethargy and depression for you — you're not alone. Up to 10% of people in the U.S. can be affected by seasonal affective disorder, which is a type of depression that occurs with the changing of the seasons. 

Swipe to see some of the most frequently asked questions about seasonal affective disorder and read more of the advice from experts at the link in our bio.",,,,,,,
https://www.instagram.com/p/Cj_UF4sOZia/,2022-10-21T20:31:59.000Z,Sidecar,13530,57,"Is there something that helps you stay grounded, healthier, or makes you just a little happier each day? We posed this question to readers and nearly 2,000 told us about their ""non-negotiables"" — whether it's eating breakfast on fancy plates or spending 5 minutes reading Nancy Drew each night.

What helps you anchor your day? Tap the link in our bio to get inspired, and DM us to have your own non-negotiable featured.

 by Andrea Chronopoulos",,,,,,,
https://www.instagram.com/p/Cj6J6sduqa_/,2022-10-19T20:26:52.000Z,Sidecar,2598,54,"CW: Pregnancy loss

A month after @daniellefriedmanwrites suffered a second-trimester pregnancy loss last fall, she received a MyChart alert saying she had a new test result to view. But she was wholly unprepared for what she saw on the screen when she clicked through: a fetal autopsy report.

Later, Danielle found out she'd received the alert without hearing from her doctor first because of a provision in the 21st Century Cures Act, a federal law that requires all medical testing centers to release results to patients “without delay.”

Its intention was to bring health care into the modern era. And the provision has successfully given patients easy access to their medical records, empowering them to play a more active role in their care by eliminating the doctor as gatekeeper. But as Danielle looked into it, she found out the provision has also led to experiences like hers in which patients are confronted with material they never wanted to see.

Most doctors support the Cures Act, which also provided billions of dollars for medical research, as a whole. “We’re big supporters of the move in this direction” in general, said Dr. Jack Resneck, president of the American Medical Association and a dermatologist in San Francisco. But this provision, he said, is leading to “emotional and mental harm.”

Read Daneille's story about the Cures Act provision, including what some say could be done to make things smoother, at the link in our bio.",,,,,,,
https://www.instagram.com/p/CjtNfxjvnup/,2022-10-14T19:48:01.000Z,Sidecar,1651,2,"Anyone else sniffling this week? Yes, cold and flu season has begun, not to mention Covid winter No. 3. 

That's why we asked health experts if there are any ways to boost our immune systems going into seasonal surges. Swipe to read what they said, and tap the link in bio for more.

: @cristina.spano",,,,,,,
https://www.instagram.com/p/CjqpOaNvT9J/,2022-10-13T19:52:36.000Z,Image,201465,1688,"“Grind culture has normalized pushing our bodies to the brink of destruction,” writes Tricia Hersey, the self-anointed Nap Bishop, in her new book, “Rest Is Resistance: A Manifesto.”

As the founder of the Nap Ministry, a grassroots movement to divest from productivity culture, Hersey has spent years preaching the gospel of rest. She stages collective napping and daydreaming events around the country, where she invites strangers to lie down next to one another while she guides them. The Nap Ministry also has a new home in Atlanta, where people can join in on collective rest and spiritual coaching sessions.

“Yes, it’s about literal naps, but it’s also about imagination work, justice work,” Hersey told us in an interview. “It’s about education: We need to understand what the systems are doing to us, so that we can resist in a way that is fruitful for us.”

Read our profile of @thenapministry at the link in bio.

Photo by @johnathonkelso",,,,,,,
https://www.instagram.com/p/CjlVuz9Pxc2/,2022-10-11T18:26:03.000Z,Image,55462,868,"All U.S. children ages 8 to 18 should be screened for anxiety, a panel of medical experts on Tuesday recommended for the first time. They have issued new guidance to primary care doctors that highlights the ongoing youth mental health crisis.

Some 5.8 million children have been diagnosed with anxiety, while 2.7 million have been diagnosed with depression, according to the CDC — though some children may be missed or misdiagnosed. Those national estimates also predate the Covid pandemic, and there are troubling signs that mental health distress among children intensified in the last few years.

Read more about the guidance and what it means for families at the link in our bio.",,,,,,,
https://www.instagram.com/p/CjbN9yLPNFs/,2022-10-07T20:05:47.000Z,Sidecar,2306,45,"Welcome to the cult of brown noise.

It sounds like wind, or heavy rain, or the steady hum of an airline jet. It’s soothing, steady, slightly rumbly.

Brown noise is like white noise but has a lower, deeper quality. It gained a fervent following over the summer, when people in  ADHD communities made videos of their reactions to hearing it for the first time. Many said it allowed their brains to (finally) feel calm. Others said that brown noise could soothe them to sleep.

Does it work for you? Swipe to hear brown, pink and white noise and read about the science behind noise therapy at the  link in our bio.

Story by Dani Blum. Illustration by @alexis_jamet. Audio production by Sara Curtis. Design by @DeannaDonegan and Hang Do Thi Duc.",,,,,,,
https://www.instagram.com/p/CjYu5SVPMej/,2022-10-06T20:55:49.000Z,Image,1617,58,"It's not just your imagination — if it seems like everyone is into pickleball now, it's because it is the fastest growing sport in the U.S. 

Often described as a combination of tennis, Ping-Pong and badminton, pickleball also appeals to all ages. And, it's fun.

“I’ve had a hoarse voice since I started playing pickleball because I’m constantly shouting and laughing,” said Ernie Medina Jr., an assistant professor of public health and pickleball coach who was introduced to the game in 2016 by his mother.

For our ""Why Not Try"" series, Juno DeMelo set out to find out what pickleball's draw is — and if it's really a good workout. (Spoiler alert: Yes, you will break a sweat.) Link in bio for the story.

Photo by @caleb_thal for The New York Times",,,,,,,
https://www.instagram.com/p/CjT6l8LLHka/,2022-10-05T00:01:50.000Z,Image,5775,20,"How long does it take to fix a marriage? Renowned love researchers, John and Julie Gottman, say to give them seven days. Catherine Pearson, Well's family and relationships reporter, set out to try the advice from the Gottmans' new book in her own relationship, including their top hack — ""turning toward"" your partner.

“Let’s say I say to John, ‘Wow, look at that beautiful bird out the window!’” Julie said. “John can totally ignore me. He can say ‘Would you stop trying to interrupt me? I’m reading.’ Or he can say, ‘Wow, yeah!’”

According to the Gottmans, those small gestures are deposits in a couple’s emotional bank account that they can draw on in moments of conflict. A nod, a touch, even a “hmm” all count as ""turning toward.""

Read more about the Gottmans' strategies and find out how Catherine's weeklong experiment went at our link in bio.",,,,,,,
https://www.instagram.com/p/CjD5pVQOwmJ/,2022-09-28T18:45:42.000Z,Image,9530,318,"Weed drinks may be having their moment.

With recreational marijuana becoming legal in several states, cannabis-infused mocktails, seltzers and alcohol-free wines are hitting the market, often sold as a shortcut to a healthier high.

These drinks are not the beverages that contain small doses of CBD, which have also been trendy for the last decade but don’t get you high. Marijuana drinks are made with THC, the intoxicating substance in cannabis, and customers seem willing to try them.

But doctors and cannabis researchers said marijuana beverages come with their own set of risks, and a long list of questions.

Read more about weed beverages at the link in our bio.

Photo: Joyce Lee for The New York Times",,,,,,,
https://www.instagram.com/p/CjBCnrSrtx_/,2022-09-27T16:06:24.000Z,Sidecar,1716,18,"Embracing a new life, while holding onto a piece of the past. 

Written and illustrated by @heyheysu for The New York Times.",,,,,,,
https://www.instagram.com/p/Ci-edB7DWi-/,2022-09-26T16:12:35.000Z,Video,969,27,"Eye movement desensitization and reprocessing therapy, better known as E.M.D.R., might look unusual to an observer. The practice involves coaxing people to process traumatic memories while simultaneously interacting with images, sounds or sensations that activate both sides of the brain. Patients might flit their eyes back and forth, following a therapist’s finger or stare at bursts of light on alternating sides of a screen. The idea is to anchor the brain in the present as a patient recalls the past.

In recent years, E.M.D.R. has attracted more attention, thanks in part to increased demand for trauma treatment throughout the pandemic and celebrities who have shared their experiences.

Patients who seek out E.M.D.R. may be inspired by another source: “The Body Keeps the Score,” a seminal book on trauma. Bessel van der Kolk, the book’s author, touts the treatment as one of the most effective ways to combat PTSD symptoms. “It’s not really an innovative treatment anymore,” he said. “It’s something that’s very well-established.”

Learn more about the trauma therapy at the link in our bio. 

: by Sophie Park.",,,,,,https://instagram.fewr1-5.fna.fbcdn.net/v/t50.2886-16/309123988_962551851805699_6473526266987892667_n.mp4?_nc_ht=instagram.fewr1-5.fna.fbcdn.net&_nc_cat=107&_nc_ohc=VpX9sgo_B1YAX_NB1nR&edm=APU89FABAAAA&ccb=7-5&oh=00_AfC3WGYPGixKFOiqQMSWgPg11y7qLkBjP6ln9fcr8QYxmg&oe=639FE6AB&_nc_sid=86f79a,34673
https://www.instagram.com/p/Ci2vK_uuJkk/,2022-09-23T16:04:03.000Z,Sidecar,35606,941,"Research has found that the stigma against bisexual people takes a significant toll on their mental health, with bisexual people reporting higher rates of depression and anxiety than their straight and gay counterparts.

Swipe to see what we know about why these disparities exist and tap the link in our bio to read more.

Photo by @mariancaa",,,,,,,
https://www.instagram.com/p/Ciur7v7uCuG/,2022-09-20T13:01:50.000Z,Image,923,49,"Hi there. You may have noticed a change on our account today — we are now @nyt_well. 

Well is the New York Times section devoted to helping you live your healthiest life. We’ll still be bringing you evidence-based articles about families and relationships from @nytimes as well as comics and quotes by our wonderful contributors. But we’re also expanding the account to include the breadth of Well’s coverage. You can expect posts about mental wellbeing, sleep (or lack thereof), friendships, women’s and reproductive health, guidance on navigating Covid and many other topics. And you will see some new series, like our Ask Well and Scam or Not columns.

For a taste of what’s to come, you can visit the link in our bio to see more of what Well publishes every day. But as we make this transition, we want to hear from you: What topics do you care about most? Let us know in the comments or DM us — and as always, thanks for being here.

 by @o_eiko.",,,,,,,
https://www.instagram.com/p/CiPriqau1Vo/,2022-09-08T12:01:57.000Z,Sidecar,14946,153,"The most wonderful time of the year 

Illustration by @coupdegracefarris for The New York Times.",,,,,,,
https://www.instagram.com/p/CgkZHjMPCkC/,2022-07-28T20:02:14.000Z,Sidecar,8171,173,"When in doubt, chocolate. 

Illustrated by @dianaschoenbrun for The New York Times.",,,,,,,
https://www.instagram.com/p/CgSzBKWPytj/,7/21/2022,Image,3246,75,"CW: Infant Loss
*
*
*
*
Last week, the CDC issued a health alert notifying doctors, nurses and public health departments to the fact that the parechovirus has been circulating nationally since May.

It is a common pathogen that usually causes mild, cold-like symptoms or no symptoms at all. But in rare instances — particularly among infants — it can cause severe illness and irreparable brain tissue damage, as was the case with Kat DeLancy’s son, Ronan.

About two weeks after he was born, Ronan became fussy, stopped eating as well as he had been and then developed a rash and grew more tired. When she took him to the emergency room, his oxygen levels were plummeting and he began having seizures. Four days later, he was diagnosed. He died in his parents’ arms, 34 days after he was born.

After his death, DeLancy set up a website where she hopes to spread awareness about his illness and raise money to fund research — in ways that are not entirely clear to her yet in her acute grief. “I want my son to have made an impact in some way,” she said. “If he can potentially help other people, it can maybe give me some peace. I can’t save him, but he can help save someone else.”

To read more about the illness and its risk factors, visit the link in our bio.

📷: Yehyun Kim for The New York Times",,,,nyt_well,true,,
https://www.instagram.com/p/CgCdmQLLVMk/,7/15/2022,Sidecar,12000,98,"In honor of our little rule-breakers.

From brother and sister duo, @eugeniaviti, a writer and illustrator and Ivan Viti, an advanced development engineer with a Ph.D. in physics.",,,,,,,
https://www.instagram.com/p/CfcENhyu9_q/,6/30/2022,Sidecar,1259,7,"A mentor turned father figure. College classmates who became life-long friends. A large group of lesbians who have supported each other over 35 years. In the LGBTQ community, it’s not uncommon to find your chosen family like these groups did.

The term refers to “nonbiological kinship bonds that many people choose because they need to have mutual support and love,” said Trevor Gates-Crandall, a social worker in Colorado who has researched chosen families. “Chosen families allow them to create the families that they want.”

Our reporter Dani Blum spoke to some of the members of five close-knit communities about how they found a sense of hope, and home, in one another. Swipe to see what they said and read more at the link in our bio. 🌈",,,,,,,
https://www.instagram.com/p/CfaEy0WrVVr/,6/29/2022,Sidecar,1806,40,"In the wake of the Supreme Court overturning Roe v. Wade, women and health care providers are asking how the ruling will affect reproductive health care more broadly.

The American College of Obstetricians and Gynecologists has warned that abortion bans — even those with an exception for ectopic pregnancies — can create confusion and impede a patient’s timely access to care.

“We’re already seeing on Twitter and elsewhere physicians being scared to treat ectopic pregnancies,” said Dr. Aileen Gariepy, director of complex family planning at Weill Cornell Medicine in New York City to our reporter Catherine Pearson. “As doctors, our job is to follow science and evidence-based medicine, it is keeping up-to-date and doing what’s right for the patient. It is not the nuances of how state legislatures wrote something.”",,,,,,,
https://www.instagram.com/p/Ce_UGZvuafc/,6/19/2022,Sidecar,13000,114,"Thanks to Sweden's lengthy parental leave, artist @freebrianrea gets to see lots of other dads out and about with their kids. Swipe to see the most common ""shapes"" he finds them in.

And if you are a dad, we wish you a very happy Father's Day (no matter what shape you are)! 🔷",,,,,,,
https://www.instagram.com/p/Ce7BhZTLe9G/,6/17/2022,Sidecar,1642,10,"This is Part 2 of Sophia's story. Check our feed for Part 1 in the post right before this one or visit the link in bio to see the whole thing.

Artist and writer @sophiadrawsdaily's father’s life was shrouded in secrecy because of his job, but one image binds them together forever, even after his death.",,,,,,,
https://www.instagram.com/p/Ce7BWwSLOrS/,6/17/2022,Sidecar,1447,9,"Artist and writer @sophiadrawsdaily's father’s life was shrouded in secrecy because of his job, but one image binds them together forever, even after his death.

Swipe to read Part 1 of her story here, and find Part 2 in our next post or at the link in bio.",,,,,,,
https://www.instagram.com/p/Ce1wlKBv22J/,6/16/2022,Image,4046,48,"Confirmed: Dogs are still great.

A new study published on Wednesday showed that children who spent 20 minutes twice a week with therapy dogs had significantly lower stress levels, even more so than those who participated in relaxation exercises.

Read more about how the powerful canine-child connection can help with stress relief at the link in our bio.",,,,,,,
https://www.instagram.com/p/Ceji9HYvXnK/,6/8/2022,Image,1567,22,"Cameron Stripling’s twin girls were born in February, 13 weeks before their due date, weighing a little over one pound each. One of her babies was discharged in late May, the other is still in a neonatal intensive care unit in Anchorage, Alaska — six hours from her home and Stripling’s days are grueling — her thoughts are increasingly consumed by the ongoing nationwide baby formula shortage.

When one daughter was discharged, the hospital was unable to send her home with any formula. And she and her husband have only been able to track down a handful of cans. “Something is not right,” she said. “There is no way that we should be having this problem.”

As the formula crisis drags parents of preterm infants like Stripling, have not yet felt the impact of measures taken by the government to help. And as they wait, the shortage is worsening what has already been a period of deep emotional turmoil for many.

As one NICU medical director in New York said: “It is already incredibly challenging to be a NICU parent.”

Read the full story of how the formula crisis is impacting parents of premature babies, at the link in our bio.",,,,,,,
https://www.instagram.com/p/CeTqLAVLbcC/,6/2/2022,Image,4523,107,"Finally, some good news. ☕

New research found that people who drank moderate amounts of coffee had a lower mortality risk than those who didn’t drink coffee.

A study published Monday in The Annals of Internal Medicine concluded people that who drank 1.5 to 3.5 cups of coffee per day, even with a teaspoon of sugar, were up to 30 percent less likely to die during a multi-year study period than those who didn’t drink coffee.

Those who drank unsweetened coffee were 16 to 21 percent less likely to die during the study period, with those drinking about three cups per day having the lowest risk of death when compared with noncoffee drinkers.

Read more about the observational study at our link in bio.",,,,,,,
https://www.instagram.com/p/Cd8ifdBrhr6/,5/24/2022,Sidecar,8113,84,A story of loss and hope. Written and illustrated by @ohtruth for The New York Times.,,,,,,,
https://www.instagram.com/p/Cdwk0N3rnr_/,2022-05-20T00:01:09.000Z,Image,2705,79,"After a bossy moment from her 7-year-old over the winter holidays, @melindawmoyer wondered, ""Am I failing as a parent if my kid is sometimes rude, or even defiant?""

Much has been written about the shift in recent years toward more intensive, child-centered parenting, and one byproduct is that many parents today are less likely to bark out orders and punish their kids, Moyer writes. They are more likely to empathize and engage in dialogue. Because of this, many children today feel more comfortable around adults, and they are more willing to challenge them and speak up when they feel the impulse.

Although this spiritedness sometimes looks unsavory, child psychologists say the shift is a good thing. It is a reflection of how safe and loved children feel and how much trust they have in their parents. Read more at our link in bio. 

???by @bonjourameliefontaine for The New York Times",,,,,,,
https://www.instagram.com/p/CdqQBGwLWj2/,2022-05-17T13:03:58.000Z,Sidecar,40503,724,"The worsening baby formula shortage in the U.S. has exacerbated an already fraught health care issue: breastfeeding. 

According to the American Academy of Pediatrics, babies should be breastfed until they are 1 or older, and the Centers for Disease Control and Prevention states that breast milk is the best source of nutrition during those early months. But the medical and economic realities of new parenthood in America can make that one-year finish line an impossible goal for many mothers. By six months, the majority of new mothers give their babies at least some formula, for reasons ranging from problems with latching or milk supply to the demands of working outside the home.

Now, the formula shortage is forcing many new mothers to push themselves harder to breastfeed, even to look for ways to start up again after having stopped ??a difficult, if not impossible, pursuit, since breasts stop producing milk soon after a baby stops feeding from them.

Along with the physical demands are emotional ones. Mothers who were already beating themselves up for no longer breastfeeding ??an activity deeply bound up with some maternal ideals ??now have the added burden of fearing their child won???get enough nutrition. They are also afraid of being judged.

Read more about the baby formula shortage at the link in our bio. Photos by @bee_alyssatrofort, @yehyunkim_visual, and @kayanaszymczak",,,,,,,
https://www.instagram.com/p/Cddlkkru8gH/,2022-05-12T15:02:11.000Z,Sidecar,12848,149,"Best seat in the house. ???

Written and illustrated by @dianaschoenbrun for The New York Times.",,,,,,,
https://www.instagram.com/p/CdbOZzKrsgO/,2022-05-11T17:01:15.000Z,Image,7628,86,"For mothers during the pandemic, the usual push and pull of work and family life has felt more like a tug of war. Yet despite concerns that they would quit their jobs en masse, most succeeded in keeping them, two new data analyses show.

Still, they were stretched thin ??and many still are. Child care, after-school care and summer camps are not back at capacity; people are still getting Covid; and for some mothers, the reopening of schools gave them a chance to pause and realize how overwhelmed they were.

?????looking around and being like, Why do I feel so stressed out this year while my kids are in school???Rebecca Bird Grigsby, a training coordinator at a gaming company, a working artist and a mother of two, told Claire Cain Miller. ??톒ere???the expectation that things should just go back to normal, that I can work at full capacity, I can focus on professional development, the kids will be fine. And that???not necessarily true.??
Read more at the link in our bio.",,,,,,,
https://www.instagram.com/p/CdTIUJ-r40p/,2022-05-08T13:34:08.000Z,Sidecar,37063,288,"For Mother Day, we asked New York Times readers to share the gems of advice that have gotten them through the tougher moments of mothering. We received nearly 3,000 responses ??with practical tips, hard truths and funny observations.

Read more advice from moms at the link in our bio.

Illustration by @tomatoseasonofficial for The New York Times.",,,,,,,
https://www.instagram.com/p/CdMgr9Drjs6/,5/5/2022,Image,12000,160,"A new study confirms what most of us already know: working parents are burned out. For two years, we have been running on fumes, hammered by the stress of remote schooling, day care closures, economic instability and social isolation.

The report, published Thursday by researchers with Ohio State University, is based on an online survey of 1,285 working parents that was conducted between January 2021 and April 2021. It gives a snapshot of a different time, when America was deep in pandemic lockdowns. But its authors say parental burnout is here to stay, because working parents don???have enough practical, structural supports to overcome the relentless stress, which isn???abating. (Any parent can experience burnout, but the new report focuses on working parents, who, the researchers believe, are at particular risk for exhaustion.)

Read more about the signs of parental burnout to watch out for at the link in our bio.",,,,,,,
https://www.instagram.com/p/CdEze8bLws9/,5/2/2022,Image,5142,96,"Slogging through pandemic life, with all its unpredictable setbacks and derailments ??not to mention brushes with existential terror ??has had a similar feeling to postpartum life, but without the silver lining of an adorable newborn. Adding an actual newborn to the mix? Forget about it, say some, at least for now, and probably forever.

@emilybooksgould talked to parents about how the past two years has shaped decision-making for them. ""The real stakes of parenting through some of the worst times to be a parent in recent history have proved to be a potent form of birth control,"" she writes, also calling out what two years can mean when we're talking about fertility. ""For other older parents, the changes wrought by the pandemic helped clarify their limitations, in ways that were painful even as they brought them something akin to wisdom.""

Read the full story at the link in our bio.

?踰? @matteich for The New York Times",,,,,,,
https://www.instagram.com/p/CcTOJquO9Ki/,4/13/2022,Sidecar,10000,72,"As many as 200,000 children have lost a parent to Covid-19 in the U.S. As families grieve, grandparents have had to step up.

In December, an estimated 167,000 American children had lost a parent or primary caregiver to the pandemic, with much higher rates among communities of color, according to a coalition called the Covid Collaborative. More recently, researchers at Imperial College London put the number of children who have lost one or both parents at nearly 200,000.

Before the pandemic, 2.6 million American children already lived in ??꿹andfamilies,??raised by relatives for reasons including military deployment, incarceration and deaths from substance abuse, other illnesses or accidents, according to reports by the nonprofit Generations United. Many more grandparents provide other kinds of support ??child care, transportation, financial help ??when a parent dies.

Read more about the grandparents who have stepped in to help at the link in our bio. Photos by @heislerphoto",,,,,,,
https://www.instagram.com/p/Cb_LJsAr1Ad/,4/5/2022,Sidecar,10000,126,"Female patients and people of color are more likely to have their symptoms dismissed by medical providers, studies show. 

New York Times readers shared their experiences with what many refer to as ""medical gaslighting.""

One reader, Ruth Anne P., wrote about an experience she had during her pregnancy.

""When I was pregnant at 38, I had terrible pains in my stomach and went to the emergency room. They hooked me up on a monitor and told me it was nothing but Braxton Hicks and I was to be discharged. I looked the doctor directly in the eye and said, 'If you send me home, I will be dead by morning.'

I suggested that maybe it was kidney stones, and was told, 'If it's kidney stones, you'd know.'

Reluctantly, the doctor agreed to a sonogram of my kidneys. When the results were in ??full right-sided kidney failure ??the doctor laughed and said, 'Well, you were right. You would've been dead by morning.'""

To read more, visit the link in our bio.",,,,,,,
https://www.instagram.com/p/Cbf-rvDu34z/,3/24/2022,Image,12000,57,"@sbmaneyphoto, a photographer for The New York Times, captured this moment during Judge Ketanji Brown Jackson's  nomination hearings. Judge Jackson???daughters and husband sat behind her, and that's Leila, 17, smiling at her mom on the first day.

When ",,,,,,,
https://www.instagram.com/p/CZLP0Yrh6fX/,1/25/2022,Image,9414,170,"All hail our critic @astromwallhess, who wrote about the antiheroine of the moment: the mother who leaves her kids. In new movies like ??톒e Lost Daughter??and novels like ???Love You but I??턤 Chosen Darkness,??the main characters may commit the mother???ultimate sin, but rather than condemnation, they've been met with a fresh response: respect. Hess, the mother of a toddler, has a theory as to why this might be. She writes:

""Being alone: that is the mother???reasonable and functionally impossible dream. Especially recently, when avenues of escape have been sealed off: schools closed, day care centers suspended, offices shuttered, jobs lost or abandoned in crisis. Now the house is never empty, and also you can never leave. During a pandemic, a plucky middle-class gal can still 'have it all,' as long as she can manage job and children simultaneously, from the floor of a lawless living room.""

We feel compelled to point out that Amanda Hess does not want to abandon her child. She is, however, ""newly attuned to the psychological head space of a woman who does."" Anyone else?

Tap the link in bio to read the full piece and see more re-imagined children's book illustrations by @lianafinck.",,,,,,,
https://www.instagram.com/p/CZIoeQephLa/,1/24/2022,Sidecar,20000,262,"Parents of kids under 5: We see you.

For her @nytopinion column, @jessgrosewrites spoke to parents across the country about what it's like to raise babies and toddlers during Omicron. The consensus was bleak. Swipe ?紐?琉?to see some of the themes that emerged and tap on the link in bio for the full column.",,,,,,,
https://www.instagram.com/p/CZFDbB3LM3V/,1/23/2022,Sidecar,2106,10,"Singer-songwriter @1allisonmoorer has an 11-year-old son who was diagnosed with profound autism when he was 23 months old. His inability to express himself with words, and her inability to know how to help him in times of distress, remain the hardest issues for her to deal with.

""In fact, I hate these moments the most of all the moments I hate,"" Moorer writes. ""With all of the helplessness I feel in so many situations, I feel it most intensely in this one. These moments are the ones in which I know the least.""

Read more in an excerpt from her new memoir at our link in bio. 

???by @isabel_seliger for The New York Times.",,,,,,,
https://www.instagram.com/p/CYpxYNTlALW/,2022-01-13T01:59:16.000Z,Sidecar,25474,653,"Anyone else feeling this lately? 

Written and illustrated by @mianolting for The New York Times.",,,,,,,
https://www.instagram.com/p/CYkm7NJFe4a/,2022-01-11T01:51:43.000Z,Sidecar,6140,81,"Responding to an increase in anti-Asian sentiment, American Girl has created a Chinese American doll to be its 2022 ??쩳rl of the Year.??
The doll, named Corinne Tan, is a powerhouse skier from Aspen, Colo., who is building the courage to respond to ??쁢nophobic comments,??the company said in a statement last week. 

Many Asian Americans have hailed Corinne as an important ??and, perhaps, overdue ??step by the company to teach children about anti-Asian racism. While racism in the U.S. has often seeped into children???toy boxes, where dolls were traditionally white, toy analysts and parents of Asian children have said that Asian dolls have been among the scarcest. Of American Girl???roughly 60 dolls, six, including Corinne, have been of Asian descent. The company discontinued its only other Chinese American doll, Ivy Ling, in 2014, prompting an outcry from parents. 

Corinne went on sale the first week of the year, and will be sold for two years ??퓍 minimum,??the company said. Read more at the link in bio.",,,,,,,
https://www.instagram.com/p/CYXjytYLbcf/,2022-01-06T00:14:13.000Z,Sidecar,13718,391,"This is parenthood nearly two years into the pandemic, as schools reopened after the holidays. Or didn't. Or were open but closed again, or ??they??켩 not sure. They??챟 let you know tomorrow. When Times reporters asked parents how they were handling their schools' approaches, the answers varied widely in specifics but mostly boiled down to: Not well.

???am screaming inside,??wrote Cathy Nieng, a mother in Chicago who said she hoped the city???teachers followed through on their threat to walk out so her 12-year-old daughter wouldn???have to return to a crowded classroom. (They did.)

So, how's it going where you are? Let us know in the comments, or just feel free to scream along with all of us from home.??튍nd tap the link in our bio for the full story these quotes are from.",,,,,,,
https://www.instagram.com/p/CYUovwBhKn9/,1/5/2022,Sidecar,14000,405,"""How is this happening to me?"" A 32-year-old pregnant woman received a call from her doctor's office saying that a prenatal blood test indicated that her fetus might be missing part of a chromosome. The next day, doctors tested a small piece of her placenta and it showed that the initial result was wrong. Today, her 6-month-old shows no signs of the condition he initially screened positive for.

On product brochures and test result sheets, prenatal testing companies that say they can detect serious developmental problems in the DNA of the fetus advertise their findings as ""reliable"" and ""highly accurate"" to pregnant women and their doctors, offering ""total confidence"" and ""peace of mind.""

The technology that experts say has revolutionized Down syndrome screening — known as noninvasive prenatal testing — performs much worse when it looks for less common conditions. Most are caused by small missing pieces of chromosomes called microdeletions. Others stem from missing or extra copies of entire chromosomes. They can have a wide range of symptoms, including intellectual disability, heart defects, a shortened life span or a high infant mortality rate.

The New York Times interviewed researchers and then combined data from multiple studies to produce the best estimates available of how well the five most common microdeletion tests perform. The analysis showed that positive results on those tests are incorrect about 85% of the time. Tap the link in our bio to read more.",,,,,,,
https://www.instagram.com/p/CYFq_wIA4D6/,2021-12-30T01:30:53.000Z,Image,1725,19,"From @nytbooks: What a year it was for children's books! Here are the most notable picture, middle grade and young adult reads of 2021, selected by The Times???children???books editor. Tap the link in our bio for the full list, and let us know in the comments what you love reading with your kids.",,,,,,,
https://www.instagram.com/p/CX4C8ndBiYk/,2021-12-24T18:30:48.000Z,Image,3634,34,"Let’s ditch the notion that there’s just one iteration of Santa and stop fighting over whose interpretation is correct, the author @NancyRedd writes. It’s time we put the power of the Christmas narrative in the most precious and important place — a child’s own imagination. 💚 Read her moving essay at the link in our bio, and to those who celebrate, Merry Christmas!",,,,,,,
https://www.instagram.com/p/CXztGMrlom7/,2021-12-23T02:02:52.000Z,Sidecar,2140,41,"Since July, families across the U.S. have been receiving child tax credits as monthly cash payments. The initiative, which was initially set to run for six months, has now wound down with the last of the checks sent out on Dec. 15.

Democrats had hoped to make the tax credits permanent as part of Biden???Build Back Better plan. But this week, the legislation  was effectively blocked, at least for now, by the centrist Senator Joe Manchin, Democrat of West Virginia. His concerns echoed that of his Republican colleagues who were united in their opposition to the full plan.

However, evidence suggests the checks did what they were designed to do. Recipients surveyed by the Census Bureau said they used the money on food an indication that the tax credit was helping to bring down hunger and food insufficiency as well as child care and school supplies.

Alisha Haridasani Gupta spoke with four families about how they used the payments for other day-to-day expenses, from doctor???appointments to car repairs, and the joys of a little breathing room. Read their stories at the link in bio.

?瑜낇닔: @alisha___g ?踰? @cornwhizzle for The New York Times",,,,,,,
https://www.instagram.com/p/CXT11Ylpb9s/,2021-12-10T17:03:31.000Z,Image,12675,189,"Although Congress has allocated trillions of dollars to combat the pandemic, the Biden administration and lawmakers have not yet created initiatives specifically for the tens of thousands of children who have lost parents and primary caregivers to Covid-19.

More than 167,000 children in the U.S. have lost parents or in-home caregivers to the disease, according to a report released on Thursday by the Covid Collaborative, a bipartisan coalition of experts in education, the economy and health.

The report, titled ??쫒dden Pain,??estimates that more than 70% of the bereaved children are 13 or younger. It is based on federal data and a modeling study led by Dan Treglia, a social policy researcher at the University of Pennsylvania.

Communities of color are disproportionately affected. Treglia, who is also part of the collaborative, said racial and ethnic disparities in caregiver loss from Covid-19 exceeded the already stark disparities in coronavirus deaths.

Leaders of the group ??headed by two former governors, Dirk Kempthorne of Idaho, a Republican, and Deval Patrick of Massachusetts, a Democrat ??have been meeting with White House officials, urging them to do more.

Parents and young people left behind said the push by the Covid Collaborative was welcome news, if only to force officials in Washington to recognize this new cohort of bereaved children. Read more at the link in our bio.",,,,,,,
https://www.instagram.com/p/CXKZy3dBp-B/,2021-12-07T01:05:23.000Z,Image,6200,34,"From @nytopinion:
""Would I prefer to live in a country that actually cared about women and their physical and emotional pain? I would,"" writes Jessica Grose. But that doesn't appear to be the case. ""Neither Democrat nor Republican voters seem to list paid leave as a top legislative priority,"" she says. So how can we move the needle if large numbers of American voters don't seem to care *that* much about it? According to @jessgrosewrites, men need to start speaking up. And they can start here. Click the link in bio to read more.",,,,,,,
https://www.instagram.com/p/CXB8eShpVVQ/,2021-12-03T18:15:16.000Z,Image,858,0,"As an expectant dad with cerebral palsy, @chrisllvaughan had been trying to prepare for parenting with a disability. But what he didn't anticipate was how challenging it would be even before his son came home. A harrowing delivery and an emergency following childbirth meant that Christopher had to care for his son alone for the first two days of his life. Through that experience, though, he found his confidence as a parent. Read more in his beautiful essay, at the link in our bio. 

??? @juncenart for The New York Times.

#IDPWD #disability #disabilityawareness",,,,,,,
https://www.instagram.com/p/CW9oJlCF6Qn/,2021-12-02T02:00:42.000Z,Image,7995,36,"After three pregnancy losses, @dannawrites couldn't believe it when she first heard the ??븂mistakable drumming sound??of her son???heart. ""At that moment, I promised myself that I would always be grateful for this baby, and for my body that found a way to grow with him,??she writes in a personal essay. ??썀d yet, when it???4:58 a.m. and I???awakened by him bellowing for potato chips and cartoons, parenting can feel tedious, lonely and exhausting."" Danna found herself asking: How can parents like me, who have struggled with infertility or pregnancy loss, reconcile gratitude for having a child at all with the everyday frustrations of parenthood? She spoke to other parents about their experiences and experts including @womensmentalhealthdoc to find out. Read the full piece at the link in our bio.",,,,,,,
https://www.instagram.com/p/CW4YBEVPLIH/,2021-11-30T01:03:28.000Z,Sidecar,13352,170,"Some of it comes easily, some is more difficult. All of it is part of the journey of stepparenthood. ?裕?Written and illustrated by @catxwillett for The New York Times.",,,,,,,
https://www.instagram.com/p/CUxsZrrPXKG/,2021-10-08T17:44:10.000Z,Image,1594,33,"Can you send your kids to my house next?

What were your tiny victories this week? Share them in the comments!",,,,,,,
https://www.instagram.com/p/CUtV2dZLkuQ/,2021-10-07T01:10:07.000Z,Sidecar,9798,243,"Typical 2-year-olds in Denmark attend child care during the day, where they are guaranteed a spot, and their parents pay no more than 25% of the cost. That guaranteed spot will remain until the children are in after-school care at age 10. If their parents choose to stay home or hire a nanny, the government helps pay for that, too.

Two-year-olds in the U.S. are less likely to attend formal child care. If they do, their parents pay full price ??an average $1,100 a month ??and compete to find a spot. If their parents stay home or find another arrangement, they are also on their own to finance it, as they will be until kindergarten.

""We as a society, with public funding, spend so much less on children before kindergarten than once they reach kindergarten,"" Elizabeth Davis, an economist studying child care at the University of Minnesota told Claire Cain Miller. ""And yet the science of child development shows how very important investment in the youngest ages are, and we get societal benefits from those investments.""

?諭?Swipe ?紐?琉?to see how much governments around the world  spend on child care for toddlers. ?逾? Tap the link in bio to read Claire Cain Miller on the Democrats??spending bill that tries to shrink the gap.",,,,,,,
https://www.instagram.com/p/CUlu196LRl4/,2021-10-04T02:14:34.000Z,Image,20496,341,"Oh good, the kids are asleep; time to claw back a few hours of a busy day, even if it means tomorrow is going to be more exhausting. ???

Whether ??똮msomnia??is your particular issue, or you??켩 battling other common parental sleep problems, the wonderful Dr. Shelby Harris (@sleepdocshelby), who specializes in behavioral sleep medicine, has advice. Read @jessgrosewrites???interview with Dr. Harris at the link in our bio. ???,Oh good",,,,,,,
https://www.instagram.com/p/CUiphF6hWsn/,2021-10-02T21:30:22.000Z,Image,4281,53,"Sarah Dougher's initial plans for having children were disrupted by breast cancer at 35. ""It exacerbated what felt impossible ??that I would live long enough to parent children successfully in a loving partnership,"" she writes in a personal essay about having kids later in life. Now, one of the consequences of having her first child at 45, and her second at 49, is sometimes being mistaken for her children's grandmother. But people are going to judge and a little empathy goes a long way, she says. At the link in bio, read Sarah's full piece about what else she's learned along the way. 

??? @michellemildenberg for The New York Times.",,,,,,,
https://www.instagram.com/p/CUftQYxDBrT/,2021-10-01T18:05:18.000Z,Image,10849,78,"We'd actually call this a pretty big victory.
Did you have a parenting win this week? Share them in the comments — no victory is too tiny!",,,,,,,
https://www.instagram.com/p/CUJT5b1D0rB/,2021-09-23T01:20:26.000Z,Image,2953,94,"Anyone else battling a Pop It! infestation? For the uninitiated, these are bubble wrap-style fidget toys with little blisters you pop in and out. The first arrived at our columnist @JessGroseWrites???home in a goody bag, and then like the L.O.L. Dolls that came before them, ??밻emed to multiply against her will like an invasive species.??

Jess wanted to find out how a toy goes from from unknown to juggernaut, and in the case of Pop It!, the surprising story involves a Capuchin monkey, a dream about breasts and TikTok. (She also wanted to know if fidget toys like the Pop It! actually do help kids concentrate in class?) 

?逾뷧ead the full column by @jessgrosewrites at the link in bio. | ??? @ohrosewong for The New York Times.",,,,,,,
https://www.instagram.com/p/CUEC7wFLw77/,2021-09-21T00:15:57.000Z,Image,42319,659,"A beautiful story of hope, family and love, in 10 slides. Written and illustrated by @sarahglidden for The New York Times. ?裕?,A beautiful story of hope",,,,,,,
https://www.instagram.com/p/CT-CaC2D4rj/,2021-09-18T16:15:58.000Z,Image,12921,130,"If you’re starting to feel like your sense of risk is ""broken"" when it comes to making decisions about what your not-yet-vaccinated kids can do this fall, you’re not alone. Our columnist @JessGroseWrites has been feeling the same way, so she interviewed two experts about the psychology of risk for this week’s newsletter. Here's what she learned

Humans have two modes of assessing risk: Fast and slow. Fast is our gut reaction to a situation — our feelings boil down to, should I be afraid of this thing or not? Slow is analytical, it involves reading and assessing numbers. The problem is, there are so many different data points when it comes to Covid and the science is in flux. As the psychologist Paul Slovic told Jess: “Our feelings don’t do arithmetic very well.”

When we are bombarded with too much awful news and upsetting numbers, we may experience indifference, a phenomenon called ""psychic numbing,"" which is perhaps more poetic than ""dead inside.""

So, how do we all cope now? We have some suggestions at the link in bio. But ultimately we have to accept that to have children means we are sending our hearts out into a world filled with risk and chance.

So, how do we all cope now? We have some suggestions at the link in bio. But ultimately we have to accept that to have children means we are sending our hearts out into a world filled with risk and chance. 

?逾? Full story at the link in bio. ??? @cristina.spano for The New York Times.",,,,,,,
https://www.instagram.com/p/CSR3aImLvW0/,2021-08-07T16:01:49.000Z,Sidecar,9962,175,"As the pandemic upended life in the U.S., more than one million children who had been expected to enroll in these schools did not show up, either in person or online. The missing students were concentrated in the younger grades, with the steepest drop in kindergarten ??more than 340,000 students, according to government data.

Now, the first analysis of enrollment at 70,000 public schools across 33 states offers a detailed portrait of these kindergartners. It shows that just as the pandemic lay bare vast disparities in health care and income, it also hardened inequities in education, setting back some of the most vulnerable students before they spent even one day in a classroom.

Swipe to read our education reporter???thread, and tap the link in bio for the full story.",,,,,,,
https://www.instagram.com/p/CRSfENSiCeY/,2021-07-14T01:16:57.000Z,Sidecar,2756,84,"It's happening. Starting this week, you may begin receiving up to $300 per child a month thanks to a temporary increase in the child tax credit. The amount you receive depends on how old your children are and how much money you make ??single parents with incomes up to $112,500 and married couples with incomes up to $150,000 are eligible for the full benefit. (Yes, this is a bit wonky.) However, analysts say four to eight million low-income children may be missing from the lists, and drives are now underway to get their parents to register online. Swipe for details about how it works, and tap the link in bio for more of The Times's coverage.",,,,,,,
https://www.instagram.com/p/CQXMkN6BcdF/,2021-06-21T00:40:07.000Z,Sidecar,7643,44,"And now we have the illustrator and author Ruth Chan, with the sweetest Dad story. Swipe ?紐?琉?to read. 

We hope all the fathers who are helping their kids fly ??even when things come crashing down ??had a wonderful day. 

?堉? @ohtruth for The New York Times. #fathersday #fathersday2021",,,,,,,
https://www.instagram.com/p/CQWXBZEB03N/,2021-06-20T16:52:14.000Z,Sidecar,6785,47,"The original idea for ""Dads,"" a new book of photography by @bartheynen, was to take posed portraits of gay fathers and their kids on the corners of their New York City blocks. Bart (shown in the last photo here, napping with his husband Rob and their sons) said he wanted to illustrate that, ??턤e? We exist all over the city.??But after a session with a family in 2015 ??when he arrived before his subjects were ready and caught them in the middle of cleaning up with an infant in tow ??he changed his approach to focus on the dads in their everyday realities, and spent the next four years with over 40 families across the country, capturing honest, personal moments. The images aren???flashy, Bart said, but rather a celebration of their lives. ??To Bart and all the dads, Happy Father???Day! 

Tap the link in our bio to see more pictures from the book and read about the families. | ?踰? @bartheynen; ?瑜낇닔: @bydaviddodge #fathersday2021 #gaydads #pride #queerpride",,,,,,,
https://www.instagram.com/p/CPrgB0SBbNZ/,2021-06-04T01:23:36.000Z,Sidecar,11183,102,"@sarahewilliamson, an art director here at NYT Parenting, spent part of the pandemic with her mom, who had recently lost her partner of 20 years, in Arizona. This beautiful piece is Sarah's story of how their time together ??gardening in the desert ??help",,,,,,,
https://www.instagram.com/p/COqB7LJhqah/,2021-05-09T15:09:54.000Z,Sidecar,5465,40,"When the pandemic hit New York City last March, @gray_sanmartin, a documentary photographer, had a 5-month-old baby and didn't want to take any risks. But she talked with other new moms about how afraid and frustrated they all felt, and wanted to find a way to tell their stories. So San Martin began photographing the mothers with their babies in parks across the city, from six feet away, in poses that echo the iconic ??췢donna and Child??genre.

San Martin also asked her subjects to write letters to their children about this past year. Now, as they are celebrating their first Mother's Day, she is sharing her project with us ??a testament to the love and resilience of so many new moms in this tumultuous year.  Swipe to see some of the portraits along with edited excerpts from what each woman wrote. ??욱닔

?踰? @gray_sanmartin for The New York Times. #mothersday #mothersday2021 #motherhood",,,,,,,
https://www.instagram.com/p/COl9cVQhEua/,2021-05-08T01:13:47.000Z,Sidecar,2135,82,"Sunday is Mother's Day, and we decided to try something novel. We??켩 asking moms to say something nice about themselves, for once. Especially this year, it seems as if so many of us talk about our perceived failures: how we??켩 failing at remote schooling or making the wrong choices for our kids when all the options are bad. Here is a chance for all of us ??mothers and mother figures ??to take a moment to actually revere ourselves, and all the big and small things we do for our families. 

?誘?닔 At the link in bio, we have answers from writers: @amberrosetamblyn on the melody she sings to soothe her kid, and herself; @vvchambers on teaching her daughter Spanish; @KateJBaer on feigning interest in Minecraft, and more beautiful and generous essays.

?裕?And in the comments, it's your turn. What's. your maternal superpower? Ideally, we can read each other's reflections and feel good about ourselves ??not just on Mother???Day, but every day, even if it???just for a moment.

??? @_janetmac for The New York Times. #mothersday #mothersday2021",,,,,,,
https://www.instagram.com/p/COBTyHCJ06e/,2021-04-23T19:37:08.000Z,Image,5195,107,"Clean teeth, full hearts, can't lose!

What were your tiny victories this week? Share them in the comments so we can celebrate together. And remember, no win is too small.",,,,,,,
https://www.instagram.com/p/CN8oT9DD6kN/,2021-04-22T00:00:20.000Z,Image,17456,755,"One of the thorniest issues between heterosexual couples is the division of household labor, and the most intractable part is the ""mental load."" In this week’s column, @jessgrosewrites asks, Why are moms the ones refilling the dish soap and thinking about summer camp in January?

Jess interviewed Allison Daminger, a Ph.D. candidate in sociology at Harvard, who has broken down the mental load, or ""cognitive labor"" into four parts: anticipate, identify, decide, monitor. Using the summer camp example, “anticipate” is realizing we need to start thinking about options months ahead; “identify” is looking into the types of camps that will suit our family’s needs; “decide” is choosing the camp; and “monitor” is making sure the kids are signed up.

The parts that women do much more of? Anticipating and monitoring. Big decisions are usually done jointly by men and women. As Daminger put it: ""Women’s antenna seemed to be constantly up and looking for these things. Whereas men were often very happy to help once their partner had alerted them to the issue and they might’ve gotten to it eventually on their own, but women were consistently getting there first.”

As she put it, the $1 million question is, what to do about it? The first step is to acknowledge and recognize the imbalance (h/t @everodsky and her book “Fair Play”).",,,,,,,
https://www.instagram.com/p/CN5-5tBjbjQ/,2021-04-20T23:20:00.000Z,Image,3241,10,"Derek Chauvin, a former Minneapolis police officer, was found guilty of murder on Tuesday in the death of George Floyd, a case that spurred the largest civil rights protests in decades.

Last week, Esau McCaulley's 13-year-old son said to him, ???do not understand why there is a trial. There is a nine-minute video.??Dr. McCaulley, who is a contributing @nytopinion writer and a professor, struggled with how to respond to his son, particularly in a moment when the Chauvin trial ""was not the only reminder of our country???deep racial injustice,"" he writes in an Op-Ed about how he will talk to not only his children, but also his students, about the verdict. He continues: ""My children and the students committed to my care have to live in this world and be frustrated by it, but they do not have to accept it as unchangeable.""

Tap the link in bio to read the full Op-Ed by @esaumccaulley for @nytopinion.",,,,,,,
https://www.instagram.com/p/CNlj1gRhtUx/,2021-04-13T00:58:38.000Z,Sidecar,55732,468,"Grab tissues, then swipe? to read this beautiful piece by Ruth Chan, an illustrator who makes children books and comics.
",,,,,,,
https://www.instagram.com/p/CNddybDBDcz/,2021-04-09T21:31:52.000Z,Sidecar,11493,394,"Over the past few weeks, online forums focused on relactation have been swarmed with mothers who have gotten the vaccine for Covid. Since studies have shown that there are antibodies in a mother???breast milk after getting the shot, they are trying to restart breastfeeding, sometimes more than a year after they???stopped. In stark contrast, other parenting and breastfeeding forums have been simmering with worries that breast milk from a newly vaccinated mother could be dangerous. 

So, what do we know for sure? Six researchers agreed that newly vaccinated mothers are right to feel as if they have a new superpower. The antibodies generated after vaccination can, indeed, be passed through breast milk. Tap the link in bio to read more of their answers to the most common questions about breastfeeding and relactation after the vaccine. Reporting by @murphy_slaw",,,,,,,
https://www.instagram.com/p/CNbVVOphz8k/,2021-04-09T01:39:29.000Z,Image,4576,31,"Are you also feeling the monotony of this moment? As @jessgrosewrites points out in this week???newsletter, ??켥rents of very small kids may find our pandemic lot particularly stifling because it???both repetitive and involuntary ??we have no choice about keeping up the routines for our little ones, who cannot do things for themselves.??Jess talked to boredom researchers ??yes, they exist ??about what Tolstoy called ??봦e desire for desires.??Link in bio to read and subscribe. ?萸?,Are you also feeling the monotony of this moment? As @jessgrosewrites points out in this week???newsletter",,,,,,,
https://www.instagram.com/p/CNLL56TrKYw/,2021-04-02T19:09:18.000Z,Image,3027,24,"Whatever it takes, friends.

What were your tiny victories this week? Share them in the comments, and remember, no win is too small.",,,,,,,
https://www.instagram.com/p/CNEY9FYAzst/,2021-03-31T03:48:39.000Z,Image,3031,8,"In the wake of this week???brutal attack on a 65-year-old Filipino woman in New York City, the Atlanta shootings that left six people of Korean or Chinese descent dead, and surging hate crimes against Asian-Americans around the U.S., adult children are trying to protect their parents. It???a ??꼛aught yet tender rite of passage that reverses the traditional parent-child dynamic,??writes Vanessa Hua in a story about the generational and cultural gaps that can make these discussions difficult for Asian-American families.

Emily Chi, a 31-year-old Korean-American in Fremont, Calif., said that in her conversations with her grandmother, aunt and mother, pictured together here, they all imagined a victim???final worry: ??뗰옙?뾥at about my babies? Who will take care of them???븝옙?
Tap the link in bio to read @mononoke97's full piece, with advice from experts on how to talk to elderly Asian-American family members about race and violence. ?踰? @cfongphoto for The New York Times.",,,,,,,
https://www.instagram.com/p/CM-1O77gE8t/,2021-03-29T00:00:19.000Z,Image,3061,88,"Last year, Lindsay Patterson, one of the producers of @tumblepodcast, gave us a fabulous list of podcasts for kids between ages 2 and 6. Now, back by popular demand, she has expanded that list to include offerings for older children between 6 and 10. Whether you??켩 looking for fiction or news or even podcasts made by kids themselves, tap the link in bio for 30 entertaining options, including seven episodes to get started with.

??? @jxiaoooo for The New York Times.",,,,,,,
https://www.instagram.com/p/CM7x_X8hiRR/,2021-03-27T19:34:13.000Z,Sidecar,6389,34,"With multiple chronic illnesses, Kari Cobham was at a much higher risk of complications from Covid-19 than other moms during the pandemic. ??썀d as a Black mother in the United States, I was not only more likely to be forced out of the work force if I couldn???figure out daily child care and full-time work, I also was more likely to die from the virus,??she writes in a beautiful essay about her family???experience. Kari recounts the repeated conversations she had with her kids about doing the hard things to protect ??럗hers, ourselves ??and me,??and speaks to experts about how parents carrying guilt over our pandemic decisions and struggles can begin to let it go. Tap the link in bio to read the full piece by @kariwrites.

??? @richchane for The New York Times.",,,,,,,
https://www.instagram.com/p/CM5gPJhJ5qR/,2021-03-26T22:20:38.000Z,Image,12754,129,"Beverly Cleary, the beloved children's book author, who enthralled tens of millions of readers with the adventures and mishaps of Henry Huggins and his dog Ribsy, Ramona Quimby and her older sister Beezus, and other residents of Klickitat Street, died on Thursday. She was 104. ??욱닔 

?踰? Peter DaSilva. A full obit is at the link in bio.",,,,,,,
https://www.instagram.com/p/CM5XATZpOOn/,2021-03-26T20:59:59.000Z,Image,9031,204,"Super speedy cleanup sounds good to me. ???

What were your tiny victories this week? Share in the comments, and remember, no win is too small!",,,,,,,
https://www.instagram.com/p/CM2j6E4n7wK/,2021-03-25T18:54:59.000Z,Image,22463,247,"New Zealand???Parliament on Wednesday unanimously approved legislation that would give couples who suffer a miscarriage or stillbirth three days of paid leave. Ginny Andersen, the Labour member of Parliament who drafted the bill, said, ???felt that it would give women the confidence to be able to request that leave if it was required.??Employers in New Zealand, as in some other countries, had already been required to provide paid leave in the event of a stillbirth, when a fetus is lost after 20 weeks or more. The new measure, believed to be among the first in the world, will expand that leave to anyone who loses a pregnancy at any point, removing any ambiguity. 

In New Zealand, whose population is five million, the Ministry of Health estimates that one to two pregnancies in 10 will end in miscarriage. The United States, where up to 20 percent of all known pregnancies end in miscarriage, does not require employers to provide leave for anyone who suffers a miscarriage. Read more at the link in bio.",,,,,,,
https://www.instagram.com/p/CMpwi-mHRDC/,2021-03-20T19:35:17.000Z,Image,3859,45,"When Heidi Shin daughter was born in 2012, she didn???plan on teaching her Korean, the language Heidi grew up speaking with her immigrant parents. But when her daughter turned 5, the little girl lobbied to learn; she wanted to communicate better with her halmoni, she said. In a beautiful, painful essay, Heidi writes about how celebrating her daughter Korean-American identity has helped her process the racism she has encountered since the pandemic began.

""When schools closed and our country locked down, my family took daily walks, chalked the sidewalks, looked for teddy bears in windows, and tried to smile from behind our masks,"" she writes. ""But when a girl in our neighborhood pointed to my daughter and said they could not play together because of the 'China virus,' I wept.""

Heidi also asked mental health experts for guidance on talking to children about their identities amid the rising tide of anti-Asian hate crimes in the United States, including the fatal shooting of six Asian women in Atlanta. Tap the link in bio to read the full piece by @shinherrie3. ??? @kim.ryu for The New York Times.",,,,,,,
https://www.instagram.com/p/CMVlGWKFrCA/,3/13/2021,Image,4402,28,"You know what they say: Little kids, little victories; big kids, huge victories. 

What was your win this week? ??,28,4402,2021-03-12T23:30:28.000Z,false,false,Photo,Photo by NYT Well on March 12",,,,,,,
https://www.instagram.com/p/CMTVpWlB-2l/,2021-03-12T02:36:55.000Z,Sidecar,16236,198,"Every grandparent who has been scared and separated from their grandkids for this long pandemic year should get a ??냫g prescription??like this one that  @jessica_anne_shaw got from her mom???doctor. Swipe ?紐?琉?for the resulting moment, and tap the link in bio to read more about the ??땚st year??for grandparents.",,,,,,,
https://www.instagram.com/p/CMJWLqBhFYc/,2021-03-08T05:29:12.000Z,Sidecar,13141,73,"In a two-hour interview with Oprah Winfrey, Meghan Markle made dramatic disclosures.??She described approaching Prince Harry and the royal family and seeking help with persistent suicidal thoughts during her pregnancy, after months of bullying from the press and being barred from leaving the house. She recounted how members of the family told Harry and Meghan that they did not want the couple???unborn child, Archie, to be a prince or princess, and expressed concerns about how dark the color of the baby???skin would be. 

???grieve a lot,??Meghan said. ???mean, I??턤 lost my father. I lost a baby. I nearly lost my name. I mean, there???the loss of identity. But I???still standing, and my hope for people in the takeaway from this is to know that there???another side.???節귢쾫
Tap the link in bio for more coverage of the interview. If you are having thoughts of suicide, call the National Suicide Prevention Lifeline in the United States at 1-800-273-8255 (TALK).",,,,,,,
https://www.instagram.com/p/CMDt1w9on-1/,2021-03-06T01:00:31.000Z,Image,3150,31,"???iPad is sleeping.

What were your tiny victories this week?",,,,,,,
https://www.instagram.com/p/CL-sIoRB2uD/,2021-03-04T02:09:22.000Z,Sidecar,1008,14,"Jessica Winter???son has disassembled battery-operated wall clocks and their apartment???doorbell. He has tried to reroute the Internet connection using Magna-Tiles while Jessica was on a video call. Once, he removed the mattress from his bunk bed and propped it against a wall to examine how the bed was made. And he???only 4! Yes, the mess and stress can be exasperating, Jessica writes, but her son???endless curiosity is often delightful. 

??췢ybe it???my responsibility as his parent to let him do a little renovation,??she says. ??쌸ter all, who else is going to see the results, and how else am I going to grab a shower??????

Read @winterjessica???full essay about her little destroyer at the link in bio. ??? @klauskremmerz for The New York Times.",,,,,,,
https://www.instagram.com/p/CL0Lb_ZB2YQ/,2021-02-28T00:11:15.000Z,Sidecar,3264,35,"Could just as easily happen to the parent of a toddler in a work meeting tbh. 

Our friends at @nytkids are looking for cringeworthy stories from kids to feature in print! This one was illustrated by @summer.pierre! Think your child would be interested in sharing a story? Just send @nytkids a DM or you can email the editors at kids@nytimes.com with their name, age and a short description of their embarrassing moment. Make sure to include an email address and a phone number so a reporter from The New York Times for Kids can contact you if they'd like to use your child's submission.

A couple notes: This section spotlights kids??stories, so please only share a moment if it???about a child's experience (about 14 years old and younger). And @nytkids is always accepting submissions, but to be considered for the March issue, you should get in touch this weekend. 

?堉? @vidhyan for @nytkids",,,,,,,
https://www.instagram.com/p/CLsGdgWBXN0/,2021-02-24T20:53:51.000Z,Image,9329,331,"There’s a psychological reason why you’re just trailing off in the middle of sentences and wondering why you walked into that room you're in. You can read all about it in the link in bio. And now, let's hear 'em. What are your best examples of having a broken brain due to the events of the past year?",,,,,,,
https://www.instagram.com/p/CLqEu_8r5uz/,2021-02-24T02:00:18.000Z,Image,26301,333,"It has been almost a year of pandemic life now, and moms need support more than ever ??in the form of government policies, employer assistance or, closer to home, partners who share in more of the work, writes Claire Cain Miller. We also need it for the future, to ensure that we are never left stranded like this again. It???not just mothers who need support, of course ??fathers, grandparents and those caring for sick or aging relatives do, too. But mothers have shouldered the extra load.

??쬷stead of a structural solution and policies, we??턤 relied on the unpaid labor of women, who are at a breaking point,??said Kristin Rowe-Finkbeiner, chief executive of MomsRising, a policy and activist group.

It doesn???have to be this way though. Tap the link in our bio for Miller???list of what we need now from our government, employers and society.",,,,,,,
https://www.instagram.com/p/CLfavdJH-nU/,2021-02-19T22:40:58.000Z,Image,1961,27,"It's Friday. Dance party time, with or without the cleanup, starts now. ?萸?琉?

What were your Tiny Victories this week? Share them in the comments, and remember, no win is too small.",,,,,,,
https://www.instagram.com/p/CLdMzaUKfz5/,2021-02-19T02:00:44.000Z,Image,3765,20,"“In one year,” Vice President Kamala Harris said, “the pandemic has put decades of the progress we have collectively made for women workers at risk.” On a video call with women’s advocacy groups and lawmakers on Thursday, the vice president said that the 2.5 million women who have had to leave the work force since the beginning of the pandemic constituted a “national emergency” that could be addressed by the Biden administration’s coronavirus relief plan.

On the call, Harris noted that nearly 400,000 child care jobs have been lost since the outset of the pandemic. The closings of small businesses and the loss of millions of jobs have created the “perfect storm” for women, particularly for Black business owners, she added. “The longer we wait to act,” she said, “the harder it will be to bring these millions of women back into the work force.”",,,,,,,
https://www.instagram.com/p/CLS95ehh2YP/,2021-02-15T02:38:00.000Z,Sidecar,4947,16,"Nobody could blame you if you weren???feeling amorous this Valentine???Day ??after nearly 12 full months in lockdown. So @janceedunn had an idea. She sought relationship advice ??tips that might have a longer shelf life than flowers or chocolates ??from people who have been forced to live with a few others under extreme and isolating conditions. 

@colchrishadfield, a retired astronaut for the Canadian Space Agency, said one of the best coping mechanisms he developed while in space for a half a year was to accept the ??꼞ll reality??of his circumstances. Though he also recalled sending flowers to his wife while he was on a months-long mission on the International Space Station. Did he arrange the delivery before he left? ??칚,??he said. ???called the shop from space.??Way to put the rest of us to shame, sir. 

Tap the link in bio for more lessons from the astronauts, a submarine commander and a ??iospherian.????? @nxrx for The New York Times.",,,,,,,
https://www.instagram.com/p/CLQUbOFqg1v/,2021-02-14T01:57:13.000Z,Image,10323,154,"Check, check and check. Happy Valentine's Day, I guess! 

?堉? @coupdegracefarris for The New York Times.",,,,,,,
https://www.instagram.com/p/CLNGzSUpYd_/,2021-02-12T20:00:24.000Z,Image,7760,44,"Faye continued: ""Considering how sleep deprived I am as a working mom with both kids remote schooling, it was a relief to receive a bit of empathy."" ???????

What were your tiny victories this week? Remember, no win is too small. We all deserve happier days.",,,,,,,
https://www.instagram.com/p/CLInvqKhiPk/,2021-02-11T02:13:09.000Z,Image,2441,167,"Recognize any of these!? Here's a hint for one of them: It rhymes with Shmurby. ???

At the link in bio, get @jessicadelfino's full list of annoying toys, from the destructive to the depressing and downright creepy. Be sure to tell us in the comments which ones you also despise, and please warn us about any major offenders that didn't make the cut. 

??? @timlahan for The New York Times",,,,,,,
https://www.instagram.com/p/CLGAUg2hmze/,2021-02-10T01:49:03.000Z,Sidecar,38835,1298,"Everyone does this, right?
",,,,,,,
https://www.instagram.com/p/CLDV8gcDER2/,2021-02-09T01:00:19.000Z,Image,22573,369,"Raise your hand if this image resembles what's in your soul. Burnout among parents, in particular moms, has been a defining principle of this global disaster. Clinical-level burnout is defined by a triad of symptoms: exhaustion, a sense of futility and difficulty maintaining personal connections. ??썀d yet, the more I hear my patients use the term ??엞rnout, the more I think it doesn???capture the depth of despair they describe,??writes Pooja Laksmin, a psychiatrist who specializes in women???mental health. ??쓊trayal??is more spot on. Dr. Lakshmin continues: ??팯ile burnout places the blame (and thus the responsibility) on the individual and tells working moms they aren???resilient enough, betrayal points directly to the broken structures around them??

So what can you do? At the link in bio, read @womensmentalhealthdoc's full piece with ways to fight back when the system is stacked against you. 

??? @csillaklenyanszki for The New York Times",,,,,,,
https://www.instagram.com/p/CK-QYntB21w/,2021-02-07T01:35:30.000Z,Sidecar,18536,296,"Sometimes Mercedes Quintana, 29, shakes with nerves. Sometimes it???hard to breathe.

She has struggled with anxiety and depression before, and had a particularly hard time postpartum. But the past year has felt endless. Her husband is shut in his office, at their home in Temecula, California, working three jobs to help pay their mortgage, their child screaming, ??췆MA NO WORK!!??when she opens her laptop.

At the link in bio, read Mercedes??story. It is part of our tale of three moms on the brink, reported by @jessicabennett and photographed by @alittlecreativeclassinc. This is their primal scream. 

?踰? Brenda Ann Kenneally for The New York Times.",,,,,,,
https://www.instagram.com/p/CK6OKr-A8RD/,2021-02-05T12:04:15.000Z,Video,9174,268,"Late last year, we opened up ""The Primal Scream Line"" for you to call into ??to shout, cry, vent  or simply hide in a closet for 60 seconds and tell us how you were feeling. We received hundreds of messages: screams, rants, cries, laughs, songs. But this was the start of something larger.

Today, we are releasing a special project with @nytgender that examines the devastating effects this pandemic has had on America???mothers, both economic and emotional. We followed the lives of three women for five months. We have provided advice and proposed solutions. And yes, we are showcasing the screams because it is time for everyone to start listening. 

You can start digging into it all at the link in bio.",,,,,,,
https://www.instagram.com/p/CK2klfUBkRF/,2021-02-04T01:58:05.000Z,Sidecar,1998,36,"@jessgrosewrites has found a new pandemic-related cultural change that is not great for parents: outdoor children???birthday parties in subarctic temperatures. But she says, ""Despite at least two more months of frigid weather here in the Northeast, I will",,,,,,,
https://www.instagram.com/p/CKpqP1PgkOI/,2021-01-30T01:37:28.000Z,Image,5900,252,"The vaccines haven???been tested in pregnant people, but U.S. and global health groups now agree that those who are pregnant may be vaccinated after discussing it with their doctor. The known risks of Covid-19 during pregnancy are significant, and what we know so far about the new vaccines suggest that they should be safe. 

??톒ere are no documented risks to the fetus, there???no theoretical risks, there???no risk in animal studies,??from the vaccines, said Dr. Anne Lyerly, a bioethicist at the University of North Carolina, Chapel Hill.

Vaccine companies are promising additional research in the coming months. 

Read more and get answers to all your questions about Covid-19 vaccines, straight from the Times's health and science reporters, at the link in bio.",,,,,,,
https://www.instagram.com/p/CKobHGygMM2/,2021-01-29T14:05:57.000Z,Image,10203,132,"Brilliant. Looking for great podcasts for kids? We've got six to start with, for ages 2 to 6, at the link in bio.",,,,,,,
https://www.instagram.com/p/CKnNbc5BMMo/,2021-01-29T02:47:08.000Z,Sidecar,5068,107,"“Before I had children, I read a few parenting books, thought they seemed to hold mothers to an unreasonably high standard, and decided I would get by with Google and ‘my instincts’,” Lydia Kiesling writes in an essay for @nytmag that is both reading recommendation and a resonant encapsulation of pandemic parenting. “But my instincts, it turns out, are not suited to this moment.”

After butting heads with her 6-year-old for months, Kiesling turned to the parenting book “How to Talk So Kids Will Listen and Listen So Kids Will Talk,” by Adele Faber and Elaine Mazlish.” She admits the writing dates itself. (“How to Talk” was originally published around 1980.) “But the Book — that’s what I call it now, the Book, as if it is a religious text — made a quiet revolution in my home,” she writes.",,,,,,,
https://www.instagram.com/p/CKSajSLhJFj/,2021-01-21T00:58:00.000Z,Image,44000,19,"Today, Vice President Kamala Harris made history as the first woman ??and the first woman of color ??to be sworn into the office of VP in the United States. And as she ascended to this barrier-breaking role, millions of people got to see a more expansive version of the American family in front of them ??one that could broaden rigid ideas of family dynamics and gender roles.

Following a visit to Arlington National Cemetery, Vice President Harris walked a stretch of the inauguration parade route toward the White House with members of her ??ig, blended??family.

??팯at???your first job???a reporter yelled out.

??팤lking to work,??she said.

Tap the link in bio for live coverage of the inauguration and to read more about the Vice President's history-making family.???踰? Anna Moneymaker for The New York Times",,,,,,,
https://www.instagram.com/p/CKFBqF7AnXn/,2021-01-15T20:10:08.000Z,Image,4587,88,"If only! 

What was your tiny victory this week? Remember, no win is too small!",,,,,,,
https://www.instagram.com/p/CKC52ClhekS/,2021-01-15T00:23:21.000Z,Sidecar,7710,118,Everything is fine,,,,,,,
https://www.instagram.com/p/CKAkQ2qqP4B/,2021-01-14T02:36:21.000Z,Image,2505,62,"Observational studies have shown that sibling conflict may happen up to *eight times an hour*. But just because rivalry is to be expected does not mean there aren???ways to mitigate it. In this week's newsletter, @jessgrosewrites shares these suggestions to contain your kids' fighting (even if you can't stop it):
?夷?Figure out what sets them off. 
?姨?Help them learn to resolve conflict. 
???Praise them in public and punish them in private. 
???Try to find moments where everyone can come together. 
And a Covid-specific note: Make sure they run around, outside or in the house.

Tap the link in bio to read the full newsletter and subscribe! ??? @joooheeeyooon for The New York Times.",,,,,,,
https://www.instagram.com/p/CJ97bKYoyIi/,2021-01-13T02:01:01.000Z,Image,3879,65,"For many parents, the pandemic has meant relaxing restrictions on what constitutes family TV, especially once you have have played every board game, read every book and baked all the chocolate desserts, as @carriem.goldman says in her piece about watching ??턢hitt???Creek??with her three kids. Goldman's interest was piqued by David, one of network TV???few pansexual main characters because her middle child is transgender, nonbinary and also pansexual. ""The greatest gift 'Schitt???Creek' gave us was offering my kids a positive, hopeful narrative about the pain, uncertainty and even agony that accompanies transitioning and coming out,??she writes.

Goldman spoke to other parents who are watching PG-14 shows with their kids, and learned from experts why it???not necessarily a bad idea to ignore the ratings. Tap the link in bio to read her full essay ??and let us know what your family has enjoyed watching together in the comments!

?踰? Pop TV",,,,,,,
https://www.instagram.com/p/CJwaL8AJjE_/,2021-01-07T20:00:25.000Z,Image,3266,29,"Many of us face 2021 filled with dread instead of New Year???vigor. This message from @jessgrosewrites may help you work through that fear. ??쬽 strikes me that perhaps the key to getting through this uncertain time is to reframe our concept of time altogether,??she writes. If you??켩 feeling overwhelmed by the pressure to pretend that things are normal, a cure may be found with those we??켩 spending so much time with now: our children. Tap the link in bio to read the full essay and subscribe.",,,,,,,
https://www.instagram.com/p/CJgijnThVfq/,2021-01-01T16:05:40.000Z,Image,4324,38,"A whole hour! This is the energy we’re bringing into 2021.

Do you have a tiny victory to share? No win is too small, especially during this what-day-is-it-again holiday week.",,,,,,,
https://www.instagram.com/p/CJeDdMqM5HB/,2020-12-31T16:55:28.000Z,Image,1673,5,"We made it! Whether you're counting down to noon and having a dance party in your living room, letting the kids stay up late and eat all the snacks or ignoring New Year's Eve entirely, here's a virtual toast to all of us who have parented through 2020. May we all face far fewer challenges in the months ahead. And if you're still looking for ways to make *another* holiday at home fun and meaningful, we've got those at the link in bio. Happy new year, dear readers. 

??? @sarahmazzetti for The New York Times.",,,,,,,
https://www.instagram.com/p/CJcgeXaB4zW/,2020-12-31T02:30:31.000Z,Sidecar,12295,138,"“I’ve come from 2020 to remind you not to forget,” Audrey Cho, a seventh grader in New Jersey, writes in this letter to her future self. Audrey had been worrying that after the pandemic people would once again take “normal” things for granted — like having friends over, visiting family or hugging grandparents. So her mom, Julia Cho, told the 12-year-old to write down how she felt, to ensure she’d have a way to remember.

The full letter is at the link in our bio, and Audrey has gladly given permission for it to be published, with the hope of inspiring others to write one too. If you (or your children) write an end-of-2020 letter, we'd love to see it; you can share them with us by using the form in the article.",,,,,,,
https://www.instagram.com/p/CJb192qB6gM/,2020-12-30T20:19:05.000Z,Sidecar,3709,66,"And where will you go all by yourself when this is all over? For the final NYT Parenting newsletter of the year, @jessgrosewrites asked readers for their fantasy child-free solo trips. These are the kinds of vacations you would take if money and child care were no object, and the coronavirus miraculously disappeared tomorrow. Tap the link in bio to read the delightful responses ??and share yours in the comments! We hope you all get to do these things in 2021, or at least find some time for yourself, even if it means hiding in your own bathroom.

??? @tiagomajuelos for The New York Times.",,,,,,,
https://www.instagram.com/p/CJUkMLhBnk-/,2020-12-28T00:29:04.000Z,Sidecar,3360,28,"A little brightness to close out your holiday weekend ?彛???????After discovering 4-year-old Eliana's fairy garden on a walk through her Los Angeles neighborhood, Kelly Kenney decided to add a bit of her own magic. The next night, a fairy named ""Sapphire,"" left little Eliana a note, promising her a glittery present if she completed three acts of kindness. Suddenly, an enchanted friendship was born. And it gets even better ??tap the link in bio for the extremely wholesome story, which, frankly, we??턤 all needed. ?踰? Kelly Kenney",,,,,,,
https://www.instagram.com/p/CJOyWi1BzJI/,12/26/2020,Sidecar,1175,12,"The true magic of Christmas right here. Don???miss the last in this trio of wins. ???

For more of our favorite tiny victories from the year, tap the link in bio. And leave yours in the comments below. ??,12,1175,2020-12-25T18:37:22.000Z,false,true,Photo,,https://www.instagram.com/nyt_well,nyt_well,NYT Well,https://scontent-lga3-2.cdninstagram.com/v/t51.2885-15/132798089_390313395598859_7681294146921262896_n.jpg?stp=dst-jpg_e35&_nc_ht=scontent-lga3-2.cdninstagram.com&_nc_cat=111&_nc_ohc=V7YuvU4yyiAAX-Xiinr&edm=ALQROFkBAAAA&ccb=7-5&ig_cache_key=MjQ3MjEzNDY5NDEzODIzOTA1Mw%3D%3D.2-ccb7-5&oh=00_AfBiFMVL7MqgsiBcBkkJIyO-mgvZbfdMJmyxt1Geev249w&oe=63A303CB&_nc_sid=30a2ef,2472134694138239053_8763678185,2022-12-17T23:45:32.279Z,https://www.instagram.com/p/CJOyWi1BzJI/,,,,,,,,,,,,,,,,,,,,,,,,,,,,,
https://www.instagram.com/p/CJOyWi1BzJI/,The true magic of Christmas right here. Don???miss the last in this trio of wins. ???",,,,,,,
https://www.instagram.com/p/CJMYfolhxlD/,12/25/2020,Sidecar,814,2,"The pandemic has tested parents??limits, and for Black families 2020 has been especially crushing. Black people are dying from Covid-19 at two times the rate of their white peers. The recession has widened the gap between Black and white unemployment. Black and Hispanic students are at greater risk of falling behind during this year???academic upheaval. 

Protests against police violence and conversations about racism in the workplace were personal. These reckonings were a sign that more Americans seemed to be acknowledging the discriminations and dangers Black people have faced for generations. And as violent clashes between protesters and police or vigilantes continued, Black parents had to figure out how to explain it all to their children. 

Black parents have watched and experienced it all, while at the same time figuring out pandemic-era child care and remote or hybrid learning. As this difficult year draws to a close, six families shared with us how they have coped. Swipe ?紐?琉?to see a few of their statements and tap the link in bio for the full story with more stunning portraits.

?瑜낇닔: @dani_mcclain ?踰? @cornwhizzle; @gioncarlovalentine; @nolis for The New York Times.",,,,,,,
https://www.instagram.com/p/CJJy4ClBoUN/,12/24/2020,Sidecar,4090,15,"Cecilia Duran, a New York City midwife, had Covid-19 when she was just 10 weeks pregnant with the baby she is pictured with here. ???was quarantining with my toddler, who was also sick, and my husband was trying to figure out his working from home situation in a small New York apartment,??she said. ??쬽 was complete insanity.??

For this week's column, @jessgrosewrites spoke to Cecilia and other medical worker moms on the Covid frontlines. Dr. Stephanie Whitener, an anesthesia critical care physician, has struggled with trying to convince her community in Charleston, S.C. to take the virus seriously. In March and April, Brianna Tremblay, an I.C.U. nurse practitioner in N.J., came home from work every night and cried. 

It's not all bad though. Tremblay said neighborhood moms stepped in and watched her kids when she lost child care: ""I saw both the worst things in the world, and the absolutely most incredible outpouring of support in my entire life."" 

You can tap the link in bio to read more, and use the comments to show support for a medical worker in your life. 

?踰? @ddrios; @leslieryann for The New York Times.",,,,,,,
https://www.instagram.com/p/CI9AzHpgHkA/,12/19/2020,Image,7702,858,"Here we go! Today we opened up the primal scream line ??where the floor is yours to yell, laugh, cry or vent for a solid minute. No judgment. Because it's been a rough nine months. We parents are stretched thin, and crawling towards the finish line of 2020. Along with our colleagues at @nytgender, we'll be creating something special with your submissions ??and much more ??for parents in 2021. So, who's ready to let it out?

The small print: You can call this line anonymously or tell us your name and how to contact you. We will not publish your information without your permission, but we may publish an excerpt of your audio. Call 212-556-3800, or tap the link in our bio for more info. 

P.S. Tag a friend who might need a good guttural yell today. ???,Here we go! Today we opened up the primal scream line ??where the floor is yours to yell",,,,,,,
https://www.instagram.com/p/CI8HfCcsVYL/,2020-12-18T12:36:30.000Z,Image,2497,47,"Parting is such sweet sorrow, indeed. 

Did you have a tiny victory this week? Share in the comments and we may feature you in an upcoming newsletter. Remember, no win is too tiny.",,,,,,,
https://www.instagram.com/p/CI6-rc6sezg/,2020-12-18T02:00:18.000Z,Image,3932,51,"At 39 weeks pregnant, Kate Glaser tested positive for Covid-19. She was isolated from her husband and twin toddlers in her bedroom, spending hours mentally replaying all her activities leading up to the diagnosis. ???was going down a rabbit hole of guilt and stress,??Glaser said. And while anxiety is warranted for pregnant people with Covid ??research has shown pregnancy increases the risk of severe disease ??the guilt is not. 

??썄e moms in a special category where they are expected to not get Covid? What about a sinus infection? Hay fever? Cancer???Margaret Howard, a psychologist in Providence, asked. ??팯y is Covid a moral failing for mothers???
The good news is that Glaser is now fully recovered with her healthy 4-month-old baby girl at home ??but for her, the psychological symptoms of Covid lasted longer than the physical ones. You can read more about the psychic toll of a pandemic pregnancy at the link in bio. If you are pregnant and struggling with anxiety during this difficult time, we??턤 also included resources in the piece.

?瑜낇닔: Kate Gammon; ?踰? @mustafahussainofficial for The New York Times.",,,,,,,
https://www.instagram.com/p/CI4J_t5M5Pe/,2020-12-16T23:41:28.000Z,Image,1907,17,"When Hayley Orlinsky found out from the news in March that doctors and nurses were running low on masks, she wanted to help. ???ran up to my room and made a little friendship bracelet,??she recalled in an interview. And she told her mom, the children's author Lori Orlinsky, that she wanted to sell these bracelets and make money for one of the hospitals. They chose to fundraise for Lurie Children???Hospital of Chicago, where Hayley had been in the NICU as a baby. Now, a project that began with a modest goal of raising $200 has far surpassed their wildest expectations. The second grader has sold about 9,000 bracelets and raised more than $22,000 for the hospital's Covid-19 fund. ???couldn???believe it,??Hayley said. ??쬽 made me feel like I was doing something really important.?????Read more at the link in bio. 

?踰? Charles Rex Arbogast/Associated Press",,,,,,,
https://www.instagram.com/p/CIzYoAqB1y6/,2020-12-15T03:13:04.000Z,Sidecar,2679,199,"Hair, artwork, clothing, teeth and yes, even belly buttons... When @jessicadelfino, a self-professed ""saver of strange items,"" asked other moms to share the detritus they had kept from their children's early years, responses ran the gamut from delightful to creepy. 

So, let's do this ??what do you have stashed away? Tell us in the comments and tap the link in bio for Jessica's full delightfully creepy piece. ??? @vanderyacht for The New York Times.",,,,,,,
https://www.instagram.com/p/CItbCqEhnGm/,2020-12-12T19:38:44.000Z,Sidecar,3509,17,"Our colleagues who make @nytkids, a special monthly print section, are on Instagram now with news and fun stuff for families to enjoy together ??? These quotes came from students at the Lowell School in Missoula, Mont. who were asked to share opinions  about subjects they??켩 passionate about. ?夷?Swipe ?紐?琉?for the responses and head over to @nytkids for more!",,,,,,,
https://www.instagram.com/p/CIqEPaBMFGR/,2020-12-11T12:21:50.000Z,Image,2489,50,"??Meow! Kittens LOVE scrambled eggs for breakfast!'?履쮖d they??켩 gone. Total win."" Share your #tinyvictories below. Bonus points if it's ?留?related.",,,,,,,
https://www.instagram.com/p/CIlzhtXhXYu/,2020-12-09T20:38:46.000Z,Sidecar,1166,19,"Carla Bruce Eddings's pandemic cat had a secret. First of all, she wasn't a kitten ... and she had another surprise in store. Swipe ?紐?琉?for the full picture, and tap the link in bio to read one of the most delightful stories we've read about motherhood in 2020.

?踰? Eric Eddings ??? @uglyorchid  #catsofinstagram #kittensofinstagram #kittens #catstagram",,,,,,,
https://www.instagram.com/p/CIjsqKos4Ti/,2020-12-09T01:00:19.000Z,Image,4925,59,"After struggling with infertility, comedian @michellebuteau and her husband welcomed twins via a surrogate ??and thought the hard part was over. Only now those babies are ??봮ddling Tasmanian curly-haired daredevils,??and the couple have realized they approach parenting in very different ways. She writes:

??쓊fore you ask, ??뾢ll, Michelle, didn???y??셪l talk about how you were gonna raise these kids before you had them???Yes, girl, we did.

We would have artisanal crafted cocktails with overpriced cherries and fantasize: ??늗 we just pick the good and bad parts from our own childhoods, we??챟 be a Lenny Kravitz/Lisa Bonet combination of woke, cool and approachable parents in vintage leather jackets.??Instead, we??턤 turned into our own sitcom. I think he???too laid-back. He thinks I???a helicopter parent.??
Sound familiar? Tap the link in bio to read the full piece. ?踰? @peytonfulford for The New York Times.",,,,,,,
https://www.instagram.com/p/CIbQAtjhB5n/,2020-12-05T18:16:01.000Z,Sidecar,747,7,"He???making a list ??he???disinfecting it twice. Santas, and those who hire or work with them, have spent months brainstorming ways to make the Christmas season safe.

???ordered Santa masks that look like my face in case I???with kids and I need to be masked. I???doing everything I can to prove I???safe,??said Santa Claus, an impersonator formerly known as Frank Pascuzzi who changed his name legally in 2012.

Mitch Allen, who works with over 50 Santas in New York and over 1,000 across the country, has recently instituted a safe Santa program.

??팫??턤 created 6-by-6 acrylic shields with a bench base that we are sending to our retail clients so there???protection between Santa and the children,??said Mr. Allen, 49. ??팫??턤 extended mall hours and added more days so people can social distance,??he continued, adding that visits will be conducted six feet apart. ??칚 one will be sitting on Santa???lap.??
Tap the link in bio to read more. ?踰? @michelleagins for The New York Times.",,,,,,,
https://www.instagram.com/p/CIZhy1cstdm/,2020-12-05T02:12:58.000Z,Image,3565,71,"It's here! At the link in bio, find the most notable picture, middle grade and young adult books of the year, selected by The Times???children???books editor. And we want to hear your recommendations too. What did your kids love reading in 2020? 

??? @robertsrurans for @nytbooks. #kidsbooks #bookstagram #childrensbooks #nytbooks",,,,,,,
https://www.instagram.com/p/CIYXS3NAm3t/,2020-12-04T15:21:59.000Z,Image,1137,44,Anyone else struggling with the outerwear right now? ???Share your #tinyvictories below!,,,,,,,
https://www.instagram.com/p/CIW_GMlj8iP/,2020-12-04T02:31:18.000Z,Image,2016,41,"Griselda, an undocumented woman who has lived in Austin, Texas for more than two decades, was afraid to give birth in a hospital as she had done with her first three children. Because she didn???want to become a target for deportation, she found a midwife and delivered her daughter at home ??and has continued to avoid using government services, including those to which the baby is entitled as a U.S. citizen, for fear that it could have repercussions down the road. 

???don???want to be a public charge,??she said, holding her week-old baby girl, worrying about the cost of her two-month checkup that was coming up. 

And she???not alone. Doctors and public health officials say there is an escalating climate of fear among undocumented pregnant people like Griselda that is having disastrous consequences for their health and the health of their babies. Their stories are at the link in bio. ?瑜낇닔: @nytcaitlin; ?踰? @lynseyaddario for The New York Times.",,,,,,,
https://www.instagram.com/p/CIUbGogMkwH/,2020-12-03T02:38:18.000Z,Image,8346,116,You too? Which qualities of your own do you now see in your kids?,,,,,,,
https://www.instagram.com/p/CIS8Ct2s4Hl/,2020-12-02T12:47:39.000Z,Image,3226,76,D. All of the above.,,,,,,,
https://www.instagram.com/p/CIRzhubK7Mq/,2020-12-02T02:14:04.000Z,Image,3864,19,"When Monica Bridges and her husband decided to have another child, they thought they'd planned perfectly. Their bills were paid, they had some savings and support from family. Then, the coronavirus came to the U.S. and she panicked. Bridges took maternity leave from her job at Starbucks early so that she could stay home. She delivered on Easter, and her husband missed the birth while waiting for his parents to watch their older child. The 4-year-old couldn't go to meet his new brother because of virus restrictions.

Bridges is back at work now. Her husband is a restaurant manager at The Cheesecake Factory, and they switch off child care throughout the day. She goes in at 6 a.m.; he has a closing shift. She showers as soon as she comes home each day, before she touches the baby. She said she feels ??뱋 fortunate??to have a stable job, that her preschooler is ??똮stly carefree??and the baby is healthy. But the stress from the virus is pervasive. ??턮metimes I worry about going to bed,??she said, ??ecause I don???want to wake up to another day where there???still Covid.??
**This post is part of our ongoing series, telling the stories of parents across the country during the pandemic. You can find the full #nytpandemicparenting collection at the link in bio.** ?瑜낇닔: @kdaniblum; ?踰?via Monica Bridges",,,,,,,
https://www.instagram.com/p/CIOmLbDndGp/,2020-11-30T20:19:37.000Z,Image,1794,34,"If you're looking for gift recommendations, our pals at @wirecutter spent hundreds of hours researching and testing toys, games and gear for us ??and they are obsessively tracking CyberMonday deals on all of it. A link to all the guides is in our bio. ?踰? Michael Hession for Wirecutter.",,,,,,,
https://www.instagram.com/p/CIJmG_JB2nv/,2020-11-28T21:42:47.000Z,Sidecar,1786,8,"Zia Hellman, 26, is one of about two dozen Baltimore City Public Schools employees to enter one of the highest-stakes experiments in the history of public education: teaching face-to-face in a pandemic. The group was required to return to work on Nov. 16 for the first in-person instruction since March. Zia, a kindergarten teacher, recognizes that returning to the classroom means not being able to visit her grandmother, and putting herself at risk, but she's yearned to be back in her school building since September.

Sonja Santelises, the chief executive officer of Baltimore City Public Schools, says the decision to reopen for a group of 1,200 academically at-risk students ??such as kindergartners, special education students and English-language learners ??was not a choice but an obligation. ""If I were to cling to one-liners or seek to score political points like some people want, I would choose not to see those families who need options, who need translators, those refugee families who walked miles to get their children an education. I will not do that.??
To read the stories of those returning to the classroom in Baltimore, tap the link in bio. ?踰? Rosem Morton for The New York Times",,,,,,,
https://www.instagram.com/p/CIDU25RF5qK/,2020-11-26T11:16:38.000Z,Image,863,10,"It may look different this year, but it's still Thanksgiving. In that spirit, we wanted to say how thankful we are for all of you. Thank you for spending time with our journalism, and for supporting each other along the way. Whether you're having a small celebration at home, a giant crowd on Zoom or ignoring the whole thing, putting the kids to bed and having ice cream sundaes, we wish you a very happy holiday.

And now, it???your turn. Tag the people you??켩 thankful for in the comments. ???琉????琉????琉???? @monicagarwood for The New York Times.",,,,,,,
https://www.instagram.com/p/CIBAjoehNtU/,2020-11-25T13:40:44.000Z,Sidecar,17482,131,"From @nytopinion: Meghan, The Duchess of Sussex, spoke publicly for the first time about the miscarriage she experienced this summer. 

""Losing a child means carrying an almost unbearable grief, experienced by many but talked about by few,"" she writes. This year has brought loss and pain to every one of us, and we're embarking on a holiday where many of us are away from family, some are ""alone, sick, scared, divided and perhaps struggling to find something, anything, to be grateful for."" In this new normal, Meghan suggests committing to asking one another a question: ""Are you OK?"" 

Tap the link in bio for Meghan Markle's full Op-Ed. ?踰? Pool photo by Ian Volger. #miscarriage #pregnancyloss #nytopinion",,,,,,,
https://www.instagram.com/p/CH_piVoMnmI/,2020-11-25T01:05:26.000Z,Video,234,4,"Many of us are putting our Thanksgiving traditions on hold this year. But, @clarkbar, a columnist for @nytcooking, says there???a new custom we can embrace: getting kids to help cook the meal. Here are three of her top tips:

???Give the littlest kids (ages 3 to 5) jobs they can do with their hands, like pulling herbs off stems.
???Kids of any age can be put to work tearing bread for stuffing.
?? Grade school kids (ages 6 to 9) can easily whisk and beat ingredients for a torte. (Tweens and teens can even make the whole recipe.)

Tap the link in bio for more advice and the recipes Melissa recommends you try this year. ?踰?+ styling: @lucyschaeffer for The New York Times.",,,,,,,
https://www.instagram.com/p/CHz-krHgmv8/,2020-11-20T12:13:18.000Z,Image,1057,10,"""I managed to get cooperative sibling play, clean kiddos AND a clean bathroom ??triple win!"" Share your #tinyvictories below! 

#parenting #kids #toddlers #nytparenting #momlife #dadlife",,,,,,,
https://www.instagram.com/p/CHwW-dyBnul/,2020-11-19T02:29:32.000Z,Sidecar,1961,8,"Skipping showers. Cake for lunch. Who hasn???lowered their standards during the pandemic? But loosening the rules for our kids, while inevitable, can lead to a particular type of parental anxiety which was captured by @eflakeagogo in this week???newsletter. She imagines the age-old good and bad angels with a parenting twist: 

??컉 one shoulder sits a mother who says children ought to be treated extra gently now, because the continuing psychic fallout of school closures, truncated social lives and a silent viral menace are huge. The mom on the other shoulder tells me to suck it up and stop letting my kid be such a baby. I think this mom smokes??????

Swipe ?紐?琉?to see these two characters and tap the link in bio for Emily's full (and extremely relatable) piece. ??? @eflakeagogo for The New York Times",,,,,,,
https://www.instagram.com/p/CHrDLKiskOl/,2020-11-17T01:00:21.000Z,Image,1110,10,"This post is part of our ongoing series, telling the stories of parents across the country during the pandemic.

Wei Lien Dang felt like he was finally adjusting to life without his wife, cobbling together a sense of normalcy. He lost her, nearly three years ago, to an amniotic fluid embolism, a rare childbirth complication. 

Now, Dang thinks about his wife a lot, while cycling through the mechanics of pandemic parenting ??taking his 5- and 2-year-old girls to their newly-reopened school and day care, catching up with friends over Zoom and planning socially distanced play dates. ???feel like I always have to be on,??he said.

When Dang misses his wife, he will often write down his thoughts, to have a ??걇ntainer for what he???feeling.??And he plays with his kids. They bake and build Legos, run around the backyard and try to learn about plants. ??쬽???a reminder that even amid all these challenges, you can still have these moments of fun or joy,??he said. ??썀d not feel completely overwhelmed.??
You can find the full #nytpandemicparenting collection at the link in bio. ?瑜낇닔: @kdaniblum; ?踰?via Wei Lien Dang",,,,,,,
https://www.instagram.com/p/CHqg2bMllP-/,2020-11-16T20:00:25.000Z,Image,1221,33,"If you have kids doing remote learning, you may be missing what @lizegan3 calls ??봦e beautiful mess of normalcy.??She knows how fortunate her family is; Egan's younger kids are already in middle and high school and old enough to work independently, and the eldest is at college. But, she wonders:

??쬼 this really the best we can offer our children? A year ago they were forming genuine relationships with teachers, tossing an arm around a friend???shoulder. Now they??켩 isolated and glued to screens. Imagine yourself at 13, completing a group project by video chat with kids you don???know; at 16, learning physics alone in your bedroom; at 19, muting yourself in class. We all have to do our part, but I don???want to get too comfortable with what I think of as the ??춅w silence.??븝옙?

Does this resonate with you? Which parts of your own ""beautiful mess"" do you miss now? Share your responses in the comments, and tap the link in bio to read the full essay. (You may just want to grab tissues first.)",,,,,,,
https://www.instagram.com/p/CHiPUb9LaME/,2020-11-13T14:53:18.000Z,Image,5957,158,"Wheeee! What was your Tiny Victory this week? Share in the comments and we might feature you in an upcoming post. Remember, no win is too tiny. ?夷?,Wheeee! What was your Tiny Victory this week? Share in the comments and we might feature you in an upcoming post. Remember",,,,,,,
https://www.instagram.com/p/CHg0qZOrM6E/,2020-11-13T01:41:08.000Z,Image,4650,30,"Today we published a collection of stories about what parents have experienced over the past several months ??a time when millions of families have lost income and many have lost loved ones. A year in which we have had to recalibrate time and again, but have also cobbled together moments of joy. In the coming days, we??챟 be sharing what we heard from moms and dads across the country. This is LaKiaya Evans, a single mom of two from Houston, Texas. 

?????a Black woman in Texas who???also queer. I have a lot working against me,??she said. Evans was teaching preschoolers with special needs before the pandemic, but just as she was learning to adjust to working from home alongside her 5-month-old and 2-year-old, she was let go. She started adopting routines from her classroom at home ??circle time using YouTube playlists and laminated worksheets for her daughter.  In her ??뱎are??time, she  started a marketing and consulting company. But the stress has been constant. 

Her lifeline has been a local Facebook group Evans started while pregnant with her first baby. Recently, she???been able to see a few friends, by taking precautions ??Evans has asthma, and worries about how the virus could impact her lungs. She is also trying to take more time for herself, to focus on her mental health. ???100 percent lost myself in trying to make sure my kids were OK,??she said. ??칚w I???trying to walk that back.????욱닔

You can find the full #nytpandemicparenting collection at the link in bio. ?瑜낇닔: @kdaniblum; ?踰?via LaKiaya Evans.",,,,,,,
https://www.instagram.com/p/CHdyz8DhpzE/,2020-11-11T21:27:12.000Z,Sidecar,1104,7,"It's Veterans Day, so @jessgrosewrites spoke with several military mothers who have deployed, at great personal sacrifice. Moms are still a rarity in the military. Women make up 16 percent of enlisted forces and 19 percent of the officer corps, and a minority of those women have children under 18. Though the number of mothers in the armed forces has grown over the past several decades, studies have shown that insufficient child care and unfriendly parenthood and pregnancy policies have been barriers to retention for female service members. Still, despite the difficult times these mothers endured, they were all incredibly proud of serving their country. Tap the link in bio to read their stories, and share your support for our troops in the comments.

?踰? @willdeshazer for The New York Times #veteransday #militarylife #militarymom",,,,,,,
https://www.instagram.com/p/CHVkfMkjf9R/,2020-11-08T16:48:08.000Z,Image,2894,8,"In her first address as Vice President-elect, Kamala Harris offered this message directly to our children. 

She also recalled her own mother, an immigrant who came to California as a teenager, and the women upon whose shoulders she stood. ""I am thinking about her and about the generations of women, Black women, Asian, white, Latina, Native American women ??who throughout our nation???history have paved the way for this moment ??women who fought and sacrificed so much for equality and liberty and justice for all.??
She continued, before introducing President-elect Joe Biden: ??팯ile I might be the first woman in this office, I will not be the last. Because every little girl watching tonight sees that this is a country of possibilities.??

Tap the link in bio for the full transcript. ?踰? @rinschaff for The New York Times.",,,,,,,
https://www.instagram.com/p/CHP7v-oAQXf/,2020-11-06T12:15:58.000Z,Image,2325,16,Here's to getting sleep where we can this weekend ???Here's to getting sleep where we can this weekend ???2020-11-06T12:15:58.000Z,,,,,,,
https://www.instagram.com/p/CHL4jRnBn6b/,2020-11-04T22:31:02.000Z,Sidecar,4193,30,"No matter what happens with this election, one thing will remain true: Parents are tired. And yet, as one of our commenters put it: ???yoga video will not erase my witnessing the decline of the Earth???future for my child.??!

That???why @jessgrosewrites sought advice from Tricia Hersey, who founded @thenapministry, a social justice movement which ??긹amines the liberating power of naps.??Hersey???work centers on Black people and other marginalized communities, but she wants us all to start reimagining rest as ??퓆ything that connects us to our bodies and mind.??Like taking a longer shower, scheduling some extra sleep or daydreaming. And she has many more wonderful ideas on her account.

??톒is numbed-out, zombie state that we??켩 in when we??켩 sleep deprived, that???a public health issue, a racial justice and a social justice issue,??Hersey said. And we need to rest up for what lies ahead. 

?萸?Tap the link in bio to read the full newsletter and subscribe. ??? @louloujoao for The New York Times.",,,,,,,
https://www.instagram.com/p/CHJgFZChMA5/,2020-11-04T00:18:45.000Z,Sidecar,5346,48,"Start 'em young. Accompanying an adult into the voting booth is a tried-and-true American tradition ??and despite the pandemic, this Election Day has proven no different. Thanks to more than 50 @nytimes photojournalists reporting from 22 states today, we now have a batch of inspiring images from polls across the country. For the Times's live updates as polls close, tap the link in bio. 

?踰? @andrewseng @alyssaschukar @amr.alfiky @hiroko.masuike",,,,,,,
https://www.instagram.com/p/CHJLQcJh5Vf/,2020-11-03T21:16:45.000Z,Sidecar,10332,251,"Anybody else looking for a little distraction today? ???????May we suggest you swipe through this delightful comic by @conz and @eugeniaviti? Then, please share your own *unofficial parenting milestones* so we can enjoy them together in the comments! ?夷?

Of course, if and when you do want up-to-the-minute election coverage, head to @nytimes.",,,,,,,
https://www.instagram.com/p/CHHAbHcBq7H/,2020-11-03T01:03:37.000Z,Sidecar,889,2,"If you’ve been wary of discussing the election with your kids, don’t be. @melindawmoyer asked experts how to talk to kids about politics, and found out it’s important to do so, even if you’re stressed. Talking about politics can help you communicate your values, Nancy L. Deutsch, an education professor said. You can discuss the policies that a candidate supports and how they uphold your family’s values (or not). You can point out that both presidential candidates are white men, as a springboard to discussing sexism and racism. Or, discuss constructive steps to take as a family, if elections don’t go the way you hope. No matter what, you don’t need to have all the answers to start a conversation. Tap the link in bio for more tips.",,,,,,,
https://www.instagram.com/p/CG_V973osCU/,2020-10-31T01:38:00.000Z,Image,1840,22,"As a mother with a heart condition, Kimberly Rex needs her family to remain in strict quarantine even though many of their neighbors have started to get together very freely. For her, that has meant dealing with constant guilt over her children missing out. Halloween, with more holidays to celebrate with friends coming up, is yet another challenge. ??쫒gh-risk parents are struggling with an agonizing situation,??she writes in an essay about her experience. ??즪ery move we make seems to require an excruciating choice between our health and our children???happiness.??You can read the full essay at the link in our bio. ??? @sonia_pulido_illustration for The New York Times.",,,,,,,
https://www.instagram.com/p/CG9-OmgFq2Z/,2020-10-30T12:51:18.000Z,Image,1254,26,"This is Halloween ??
 What was your #tinyvictory this week? Remember, no win is too small!",,,,,,,
https://www.instagram.com/p/CG8tN7GBaBa/,2020-10-30T01:03:23.000Z,Image,1652,10,"The data is heartbreakingly clear: Black women in America have more than a three times higher risk of death related to pregnancy and childbirth than their white peers. For women over 30, the risk is as much as five times higher. In light of this knowledge, @ericachidi, the founder of @loomhq and @drericacahill, an ObGyn at Stanford, went looking for resources to help Black women navigate their prenatal and postpartum care ??but came up empty when looking for a resource that explicitly called out encountering racism during this time. So they created their own.

??팫 felt it required an allied, intersectional perspective that acknowledged the importance of care providers and health educators working together on behalf of patients,??they write. You can find their complete education guide, which includes a modern framework for medical providers to actively address their own racism, at the link in our bio. 

??? @carefulblackgrl for The New York Times.",,,,,,,
https://www.instagram.com/p/CG3lI6Vh_u3/,2020-10-28T01:16:35.000Z,Sidecar,5375,458,"Some parents don???need horror movies. The real terror already lives within their own walls. Harper, 6, told her parents about ??뱆eleton men??who live in their house and sometimes the yard, too. At 3, Calvin started talking about death. Torres McGovern???preschooler said, in a past life, she crashed while riding a mountain bike on an icy sidewalk and woke up in her mom???uterus. All of the above, experts said, are examples of normal developmental behavior. It???healthy to have a vivid imagination!

So in anticipation of Halloween, and because it is an election year during a pandemic, please share your best creepy kid stories in the comments.?紐?Bonus points for the most hilarious. And tap the link in bio for the full story by @caron_nyt. 

??? @janik_soellner for The New York Times. #???,Some parents don???need horror movies. The real terror already lives within their own walls. Harper",,,,,,,
https://www.instagram.com/p/CG0VYBSAvyX/,2020-10-26T19:01:09.000Z,Image,2143,37,"Mom, I just can’t stare at a screen all day!! Can I take a break and play video games now? See also: Can I watch a show?
",,,,,,,
https://www.instagram.com/p/CGvX1mcDudR/,2020-10-24T20:46:28.000Z,Image,2356,46,"More than seven months into the coronavirus pandemic, it has become clear that many patients do not fully recover. At just 12 years old, Maggie Flannery is one of these ""long haulers,"" left with symptoms like lingering fatigue and other chronic problems. She has trouble focusing on her homework, and no longer attends her ballet class online. ??턮me days are a lot better than others,??Maggie told the Times.

Dr. Richard Besser, a pediatrician and chief executive of the Robert Wood Johnson Foundation, said parents can be reassured by the data on children???reduced overall risk of infection. But he noted that continued vigilance is warranted. ??팱th schools reopening, we??켩 likely to see more infections in children,??he said. ??팫 need to make sure we??켩 doing the studies to understand the short, medium and long-term effects.??
Link in bio for the full story. ?踰? @bnewmanphoto for The New York Times.",,,,,,,
https://www.instagram.com/p/CGr0vdeBfZo/,2020-10-23T11:42:02.000Z,Image,1215,32,"""They also stick well on the fridge."" Share your #tinyvictories below!",,,,,,,
https://www.instagram.com/p/CGoGiulIWG4/,2020-10-22T01:00:41.000Z,Image,4051,69,"cw: This piece deals with pregnancy and infant loss.

If you??턤 experienced miscarriage, stillbirth or infant loss, you may understand when Priscilla Blossom says she is ??뎓alous of the ??줭sy??pregnancies"" she??챟 never have. Priscilla lost her first baby at 22 weeks. And while she wanted to feel bliss when she was pregnant again, she never did. As she puts it: 

??톒e loss of joy and wonder as a pregnant woman is a bit like losing your faith in Santa Claus, the Tooth Fairy, in magic, or in God. Knowing what???potentially behind the curtain changes something in you. Loss and high-risk pregnancies do that, except many of us don???talk about it.??

By talking about her trauma openly, Priscilla helps those of us who have gone through something similar feel a little less alone in our struggles. Link in bio for the full piece. 

#pregnancylossawareness #miscarriage #pregnancyandinfantlossawareness #stillbirth",,,,,,,
https://www.instagram.com/p/CGnq-2zhOtk/,2020-10-21T20:59:48.000Z,Sidecar,457,14,"As a diversion from all this ::gestures broadly:: mess, @jessgrosewrites searched the @nytimes archives to find out what kinds of bonkers parenting advice we were doling out a century ago. Swipe ?紐?琉?to see what she found, from the hilariously misguided to surprisingly sensible.

1926: A new magazine called ??엋ildren??was intended for parents, and the Times said its purpose was ??봮 bring scientific findings about children to the harassed elders on the firing line.??(1, 2)

1919: Dr. Lambert Ott, who was speaking at a convention of the American Medical Association said, ???have used red wine as a tonic for weak children with amazing results. (3)

1939: In the ??0s and ??0s, The Times had a parenting writer who quoted former New York City Mayor Fiorello La Guardia, with the advice for kids: ??죓n???play with knives, fireworks or guns.??(4)

1952: Clark E. Vincent, a graduate teaching assistant in sociology, who had surveyed 60 years of child-rearing advice provided his ultimate takeaway: Less dogmatism and more flexibility, ??뱋 long as the baby???needs are satisfied.??(5)

As Jess concludes, ??췢ybe if we keep giving this advice for the next 70 years ??that there???no one way to parent, that kids can thrive in many different situations ??it will finally stick.??Link in bio to read more in the newsletter and subscribe. ?萸?,As a diversion from all this ::gestures broadly:: mess",,,,,,,
https://www.instagram.com/p/CGlhxCnIYeC/,2020-10-21T01:00:51.000Z,Image,4904,150,"If this looks like live footage of your child at bedtime, welcome to parenting! Tantrums, common as they are among small children, are a complicated physiological response related to the brain???threat detection system. And since kids don???have fully developed brains, we have to help them mitigate these supposed threats. Three steps to remember:
??First, manage your own emotions
??Next, manage your kid???reaction
??Finally, validate your child???feelings

Link in bio for the science and advice. 
??? @armandoveve for The New York Times.",,,,,,,
https://www.instagram.com/p/CGk5LznhVjk/,2020-10-20T19:06:11.000Z,Sidecar,10197,339,"A portrait of the artist as a mother with a day job Now, what was I doing? 
",,,,,,,
https://www.instagram.com/p/CGgY7g3B4gM/,2020-10-19T01:07:22.000Z,Sidecar,12027,100,"Who’s up for a few more hugs this week? Important reminder via @lisa.damour, who writes the Times’s adolescence column.",,,,,,,
https://www.instagram.com/p/CGdQvcoFHnN/,2020-10-17T19:58:07.000Z,Image,3277,36,"Some good news for a change. The pandemic might be bringing us closer to understanding what causes premature birth. Studies in Ireland and Denmark this summer showed that preterm births decreased in the spring during lockdowns held to stop the spread of the virus in those countries. Anecdotally, doctors around the world have also reported similar drops, and they have some theories as to why. Tap the link in bio to read more. ?踰? Getty Images",,,,,,,
https://www.instagram.com/p/CGbMTqiBjal/,2020-10-17T00:40:52.000Z,Sidecar,4506,59,"For many pregnant people, seeking alternatives to a hospital birth has been a way to regain control during the pandemic. As a result, midwives in Los Angeles, where photographer @maggiehshannon is based, have seen demand for their services rise. Maggie spent the spring and summer capturing their experiences.

????턤 never documented anything with so much emotion in it,??Maggie said. ??칚t only extreme pain, but also extreme joy.??What was especially notable to her was how different each mother???experience was. Especially striking to her was ??봦e strength in women,??both on the part of the mothers and the midwives, regardless of what happened during each mother???labor.

One of Maggie???most memorable subjects was Tsune Brown, 29, who is shown in the first photo here with her second child, a boy. ???don???normally cry when I edit photos, but going through the images of her birth brought me to tears again,??Maggie said. Tap the link in bio to see more of her powerful series with reporting by @caron_nyt. 

?踰? @maggiehshannon for The New York Times.",,,,,,,
https://www.instagram.com/p/CGYJDGnBbOC/,2020-10-15T20:14:40.000Z,Sidecar,836,24,"During Judge Amy Coney Barrett???Supreme Court confirmation hearings, Republican senators have emphasized her role as a mom of seven. They described her mothering as ??봧reless??and ??뭙markable,??evidence that she was a ??뱔perstar.??Judge Barrett has embraced the image.

Senator Kamala Harris, the Democratic vice-presidential nominee, has, in other settings, spoken about her role as a stepmother. She???called Momala, she has told voters, and she cooks the Sunday night family dinners.

In a new column, Claire Cain Miller and Alisha Haridasani Gupta analyze the tightrope that female public figures like Barrett and Harris must walk when their motherhood takes central stage: ???woman who is professionally successful and ambitious is often seen as threatening or off-putting, researchers have found in multiple surveys of voters, but being a mother tempers that. It makes women seem warm and relatable ??and suggests they can relate to voters??lives, too. Yet Americans are also ambivalent about mothers who work, forcing women to negotiate an obstacle course of perceptions and expectations.??
Link in bio for the full piece. Comments for the ???琉????る쪌?묆??ｃ굪?ｂ뫆???놁뻹占쎈씚???
?踰? Erin Schaff for The New York Times",,,,,,,
https://www.instagram.com/p/CGVjYyKFUj1/,2020-10-14T20:07:07.000Z,Image,10293,132,"Say it again for the people in the back: The pandemic is forcing moms out of work. Women already accounted for the majority of jobs lost earlier in the year. And every month since June, ??봦ere???been a pronounced slowing of job growth and labor participation for married women,??according to Michael Madowitz, an economist at the Center for American Progress. Overall, four times more women than men dropped out of the labor force in September, just as many U.S. schools started with remote schedules. The cost is not only financial; it is emotional and has potential to do lasting damage to our society. 

Tap the link in bio to read more in this week???newsletter by @jessgrosewrites. ??? @owaller for The New York Times.",,,,,,,
https://www.instagram.com/p/CGSppBxBAwM/,2020-10-13T17:04:02.000Z,Sidecar,484,0,"In 1939, @meganrachel12's grandfather, an artist, helped create Captain America as a response to the horrors of Nazism taking over Europe. ??쌸ter he died in 2011, it was Captain America and his shield that served as my talisman and comforted me,??Megan writes in a delightful essay about how her grandfather???legacy has helped her ??and  now her 4-year-old ??weather the uncertainties and challenges of this year. Link in bio. ????????踰? @kayanaszymczak for The New York Times.",,,,,,,
https://www.instagram.com/p/CGOYv9qhYsw/,2020-10-12T01:19:28.000Z,Sidecar,375,6,"Monday, October 12 is Columbus Day. Some states recognize it as Indigenous Peoples??Day. If you??켩 interested in talking to your kids about the explorer and his complicated legacy, swipe ?紐?琉?for books to help start the conversation from our friends at @nytbooks. More info about each pick at the link in bio. 

1. ??갻fore Columbus: The Americas of 1491,??by Charles C. Mann. Ages 8 - 13.

2. ??뾥ere Do You Think You??켩 Going, Christopher Columbus???by Jean Fritz. Ages 7 - 9.

3. ??n Indigenous Peoples??History of the United States for Young People,??by Roxanne Dunbar-Ortiz. Ages 12 - 15.

4. ?? Coyote Columbus Story,??by Thomas King, with illustrations by Kent Monkman. Age 5 and up.

5. ??봦e Golden Flower: A Taino Myth from Puerto Rico,??by Nina Jaffe. Ages 4 -8.

#kidlit #bookstagram #childrensbooks #kidsbookstagram #kidsbooks",,,,,,,
https://www.instagram.com/p/CGL1h8Xhx2o/,2020-10-11T01:33:14.000Z,Sidecar,4376,13,"Tonight, in honor of #WorldMentalHealthDay, we're sharing Amanda Rosenberg's moving piece about her experience with mental illness before and after kids. Even with a treatment plan in place for postpartum depression, Amanda experienced postpartum psychosis. Once that lifted, she says her 'old depression' was still there. ""But as any parent knows, you can???even go to the bathroom alone, let alone have a meltdown."" 

The conversation around parents' mental health has always been vital, but the unprecedented pressures of 2020 have brought it to the forefront in a new way. Tap the link in bio to read Amanda's story, and use the comments to share your own, if you'd like. ?踰?via Amanda Rosenberg.",,,,,,,
https://www.instagram.com/p/CGLBsZBFQSe/,2020-10-10T18:00:18.000Z,Image,773,8,"For the first few months of pandemic parenting, @simonegorrindo was concerned, but generally unfazed. She is a military spouse ??and no stranger to the challenges of parenting solo; her husband is part of a rapidly deployable combat unit and spends much of his time overseas. Then, duty called over the summer, and a new kind of loneliness and dread sank in for Simone. She wrote about her experience and spoke to fellow military spouses about the challenges they're all facing now. Tap the link in bio to read. 

?踰? @fremson for The New York Times. #militaryfamily #militarywife #militaryspouse #militaryfamilies",,,,,,,
https://www.instagram.com/p/CGGSS3YhySK/,2020-10-08T21:49:08.000Z,Sidecar,6019,62,"Over fifty million people of all ages watched Senator Harris and Vice President Pence in the vice-presidential debate on Wednesday night, and viewership was even higher for last week???debate between Former Vice President Biden and President Trump. After loving her young daughter???running commentary ??""an antidote to my political malaise"" ??Leila Sinclaire, a teacher, writer, and mother, reached out to families to share their own kids' thoughts on both debates. Swipe ?紐?琉?for sharp analysis from kids across the country.

Leila also sought advice on how to talk about debates like the ones we??켩 seeing this year with children. She writes:

It???difficult to decide how much to involve our children in the democratic process when the adults in leadership roles don???always behave. Theresa Hall, a licensed marriage and family therapist, reminds us that children look to us, their close adults, to model appropriate behavior. Since young children aren???developmentally ready to process the (ahem) substance of the debates, they will likely focus on the interaction of the debaters. Hall says we should prep kids to watch and then debrief after, using any untoward behavior as a teaching opportunity, asking children, ??팯at might you do differently???She also suggests we (ahem) ??똞nage our own reactivity??as best we can.

Quotes via @lucidleila",,,,,,,
https://www.instagram.com/p/CGDdAuwBbyY/,2020-10-07T19:25:04.000Z,Sidecar,7890,101,"""If you didn't want to spend time with your kids, you shouldn't have had them in the first place."" Sound familiar? This infuriating retort, sometimes lobbed at parents who dare to complain, has become commonplace as more people express frustration with pandemic parenting. In this week's newsletter, @jessgrosewrites takes down this argument with such a vengeance that you'll want to highlight every word. Tap the link in bio to read and subscribe. ?堉껅닼? @kikiljung",,,,,,,
https://www.instagram.com/p/CF--_JTh4QZ/,2020-10-06T01:45:44.000Z,Image,3052,189,"“Mother’s little helper” is back — and daddy’s partaking too. @jessgrosewrites spoke to women across the country, and in Canada where marijuana is legal, about substances they're using to distract from the hellscape that is pandemic parenting. “I smoke some weed and am able to calm down and clean my kitchen and do my laundry and do some regular person things,” said Julie Kortekaas, 36, a mom of two, in London, Ontario.

That said, middle class parents’ self-medication has long been recreationalized, even romanticized in America (so long as they were white). And drinking or getting stoned isn’t an option for many parents with a history of substance abuse. Katy Maher, a mom of twins in Chicago who’s been sober for 18 years, said she tries not to judge the “mommy juice crowd,"" but “I absolutely think it’s harmful in many ways.""",,,,,,,
https://www.instagram.com/p/CF-Am8SBl5Y/,2020-10-05T16:40:40.000Z,Sidecar,519,3,"The last time Blandí Rodas walked out the door of her mobile home in Talent, Ore., the primary thing on her mind was school. All summer, her daughter, Kailyn, had talked about nothing else. The 7-year-old couldn’t wait to see her friends — even if it was just through a screen. But that day, the Rodas’s trailer park went up in smoke. School was postponed as an estimated 40 percent of students in their district lost their homes.

Now, with hundreds of families living in hotels or with family, camping in public parks or even taking rooms with strangers, Isobel Whitcomb, a journalist who grew up nearby, reported on an unprecedented challenge this community is facing: How can you make distance learning work when students have no place to call home? Read her story at the link in bio.",,,,,,,
https://www.instagram.com/p/CFz_Y0aF9vt/,2020-10-01T19:17:38.000Z,Image,14739,87,"Thank you, @smashfizzle, for this. ????Our thoughts are with @chrissyteigen and @johnlegend and so many others who have coped with the heartbreaking loss of a pregnancy or infant. You don???have to grieve alone. If you???like to share your own stories in the comments, we??켩 here to hear them ?裕?,Thank you",,,,,,,
https://www.instagram.com/p/CFxpTIOlHBE/,2020-09-30T21:26:08.000Z,Image,1709,38,"When we asked NYT Parenting readers for their most pressing pandemic concerns, we kept hearing the same question: How will masks, social distancing and lack of interaction with other children affect our kids??social and emotional development? For this week???newsletter, @jessgrosewrites asked four experts in child psychology and social development to share the minimum level of interaction kids need by age range. While yes, there are some changes afoot, the good news is most neurotypical kids will be just fine. Tap the link in bio to read and subscribe. ?堉? @uglyorchid",,,,,,,
https://www.instagram.com/p/CFvKOZzB2EE/,2020-09-29T22:16:06.000Z,Sidecar,1518,19,"Many families are struggling during the pandemic. If you have the means, swipe to learn how you can help, and tap the link in bio for more information.",,,,,,,
https://www.instagram.com/p/CFqLUrVDyv1/,2020-09-27T23:49:31.000Z,Image,769,39,"In the fall of 2018, all three of Mallory Bradley???kids got sick. Her sons, aged 8 and 2, were soon back to normal, running around their new house in Norfolk, Virginia. But Ryleigh, Bradley 3-year-old daughter, spiked a high fever, and seemed floppy and unsteady. So, on a hot Thursday in September, they went to a local children???emergency room. Doctors there told her not to worry, gave Ryleigh some IV fluids and sent her home. On Sunday morning, however, Ryleigh struggled to get out of bed. This time, the doctors didn't send her home.

Ryleigh was diagnosed with acute flaccid myelitis, or A.F.M., a rare neurological disease that follows an infection with a common virus from the enterovirus family. Most kids recover from enteroviruses, but a tiny fraction go on to develop A.F.M., and the consequences can be devastating. Doctors are warning that A.F.M. cases may increase this year, though social-distancing practices should reduce disease transmission at large. Still, it???helpful to know the signs. Tap the link in bio to learn more. ?踰? @gregkahn for The New York Times",,,,,,,
https://www.instagram.com/p/CFmZyYLBFJu/,2020-09-26T12:38:55.000Z,Sidecar,2602,33,"A bedtime classic that has been translated into 57 languages, ??쪀ess How Much I Love You??has been a part of parents??and children???lives for more than 25 years. The author, Sam McBratney, died on Sept. 18th at age 77. ??퐋u could recognize his voice in a moment,??a colleague said of him in a statement, ??냙 was an exceptionally talented wordsmith and always knew exactly what children would enjoy hearing the most.??To learn more about McBratney???life and work, tap the link in bio to read his obituary ??and tell us what this book means to you and your family in the comments below.",,,,,,,
https://www.instagram.com/p/CFlBnLEFKRn/,9/26/2020,Image,1112,20,"Wildfires are still burning in California and Oregon, and the larger fire season won???end until November. Smoke from these fires can damage children???lungs and throw their immune systems out of whack. Here???what you can do to keep your family healthy:?????逾?Don???take your children outside if the Air Quality Index is above 100. If it???over 150, considering staying indoors yourself if you??켩 able. ???????If you can go outside, have children wear masks, and limit it to 30 minutes of low intensity activity to avoid prolonged exposure and heavy breathing.?????裕?Indoors, it helps to think about the risk of wildfire smoke in terms of reducing it, not eliminating it entirely. Tightly seal your windows and repair any cracks to exposure up to 30 percent. You can also use HEPA air purifiers and upgrade your central air system with MERV-13 filters to cut down exposure. If doing this all over is prohibitive, even creating one ??걄ean room??makes a big difference.?????萸?If medicine helps control your child???asthma, stockpile extra doses during fire season. And stay attuned to your kid???reactions: watch for coughing and wheezing, and check whether they??켩 developing headaches or a dry mouth.?????醫묓닔 If a child has trouble breathing, becomes sleepy or refuses food or water, seek cleaner air and medical attention. For more tips on how to protect children from wildfire smoke, tap the link in bio. ?踰?: Celeste Noche for The New York Times??,20,1112,2020-09-25T23:48:27.000Z,false,false,Photo,Photo by NYT Well on September 25",,,,,,,
https://www.instagram.com/p/CFj7-hADZf0/,2020-09-25T13:39:59.000Z,Image,752,14,"""Now he happily slides right in as soon as he sees food ??no more kicking, screaming, or flailing limbs."" Share your #tinyvictories in the comments!",,,,,,,
https://www.instagram.com/p/CFhZoZojuaN/,2020-09-24T14:01:23.000Z,Image,2358,32,"Across the country, moms working in retail are facing an extra burden; they say they are being forced to choose between keeping their jobs, often with inflexible schedules, and facilitating remote learning for their kids. 

Patricia Reveles recently asked CVS, where she has worked for more than 20 years, to reduce her hours without taking away all of her full-time employee benefits. She is a single mom, and realized that her mother, who she has long relied on for child care, doesn???have the tech skills to support online learning. Likewise, Prandai Ramnauth, who works part time at Bloomingdale??? and is her children???sole caregiver, has considered taking a leave to be there for her kids. Onie Patrick, a part-time cashier at Aldi, works at night and manages virtual school for her four kids during the day. ??쬽 seems like a lot of moms, they take on the brunt of everything,??Patrick said. 

Tap the link in bio to read more of these women's stories. We??켩 also including a link to our recent piece on how to help families who are struggling during the pandemic. ?踰? @maggiehshannon for The New York Times.",,,,,,,
https://www.instagram.com/p/CFfXDvbF6yO/,2020-09-23T19:00:26.000Z,Image,7948,114,"Oof. If you’re a millennial, or millennial-adjacent, you probably saw @annehelenpetersen’s viral Buzzfeed article, “How Millennials Became The Burnout Generation,” which the internet heralded as the perfect summation of why many of us are so damn tired all the time. Now Petersen has turned that piece into a book, “Can’t Even: How Millennials Became the Burnout Generation,” with a chapter on how exhausted millennial parents are. And that was written pre-pandemic. Since we’ve currently added lockdown and virtual school and job losses and more to our plate, we asked Petersen to write about the unique pressures parents are facing at this particular moment. If you need a collective battle cry, or just to feel seen, tap the link in bio to read her spot-on take.",,,,,,,
https://www.instagram.com/p/CFc2e8OhIgv/,2020-09-22T19:37:59.000Z,Video,828,51,"Ever wondered why your kid completely loses it when their cookie breaks in half? They??켩 not just being difficult. Thanks to an odd quirk in the developing brain, small children can???always understand that things can look different and still be the same. That concept is what child psychologists call ??걇nservation.??And, it turns out, there is a very simple test you can do on your own child to see how it works. In this video, Dr. Stephanie Sitnick performs the experiment, called ??봦e conservation test,??with her 4-year-old son. 

Now it???your turn. All you need is one child under the age of seven, and materials you have around the house like water or Play Doh. A simple set of instructions are at the link below. Record what happens when you do the experiment and post your videos using #nytmindgames and we might feature it on our account. ???: The New York Times

https://www.nytimes.com/2020/09/21/parenting/children-minds-conservation.html",,,,,,,
https://www.instagram.com/p/CFa2u0UFD1o/,2020-09-22T01:00:59.000Z,Image,860,23,"If your child is refusing to do anything these days without also having a snack, you??챟 be relieved to know it???pretty normal. Without the structure of in-person schools and other activities, they may be self-soothing with food, which is not, in and of itself, an unhealthy thing to do, @vsolesmith writes. But if their snacking has turned into all-day grazing that replaces regular meals at the table, it might be time to intervene. Tap the link in bio for Virginia???steps on how to make a snack time schedule stick. ?踰? Gregg Segal",,,,,,,
https://www.instagram.com/p/CFZl_iLAsnq/,2020-09-21T13:15:29.000Z,Image,5234,63,if it's on the internet it has to be true ?堉? @coupdegracefarris for The New York Times,,,,,,,
https://www.instagram.com/p/CFXuXGWhSQI/,2020-09-20T20:30:09.000Z,Video,6889,172,"This is Mackenzie Adams, a kindergarten teacher in Washington state, who recently gave everyone a taste of the energy it takes to hold little kids??attention in virtual school. She posted this now-viral video of herself on TikTok, animatedly teaching her students about the number four ??and how to use a mute button. ??쬽???keeping them engaged and looking at me,??Adams told the new Times coronavirus schools briefing about her enthusiasm. ??톒at???where those facial expressions come from and those big gestures.?????

Of course, if you have kids in school this fall, you know how hard teachers are working. Let's take a moment to thank them all ??use the comments below to shout out an educator in your life. 

?踰?via Mackenzie Adams. Link in bio to read more and sign up for the new schools briefing. ?萸?,This is Mackenzie Adams",,,,,,,
https://www.instagram.com/p/CFU9DmqDR0u/,2020-09-19T18:00:48.000Z,Image,385,4,"This summer, @primattoo two children were supposed to spend a chunk of time with her parents who would immerse them in their Kashmiri culture and language. But they couldn spend that time together because of the pandemic, and in the absence of valuable grandparent time, Priyanka worried her children were missing out on a crucial opportunity to absorb their culture. What ended up happening when she listened closely to her children, however, pleasantly surprised her. Tap the link in bio to read her essay. We also love to hear how you been teaching your children about your culture in the comments.",,,,,,,
https://www.instagram.com/p/CFTOWKoBcaR/,2020-09-19T01:53:22.000Z,Image,22792,122,"From ""Ruth Bader Ginsburg Advice for Living,"" written in 2016 for @nytopinion.

Justice Ginsburg, the second woman to serve on the Supreme Court and a pioneering advocate for women rights, who in her ninth decade became a much younger generation cultural icon, died on Friday. She was 87. Her full essay is at the link in bio.",,,,,,,
https://www.instagram.com/p/CFRst19AHJT/,9/18/2020,Image,799,12,"triumph!

What was your tiny victory this week? Remember, no win is too small.",,,,,,,
https://www.instagram.com/p/CFPmREwl2Ho/,2020-09-17T16:05:27.000Z,Image,1747,22,"After months of sheltering in place without support or reprieve, @daniellecampoamor isn???sure her relationship can sustain the added pressure of the pandemic. ???know I???not alone,??she writes. ??쬽???not uncommon for me to peruse social media and read a post from a mom asking for guidance as she prepares to tell her partner she wants to separate, or a mom filing divorce papers and asking single moms for advice.??According to an Ipsos poll,  nearly one in 10 married or partnered people in the United States say they are very likely to separate from their partner or spouse at least in part because of issues related to Covid-19. Danielle spoke to attorneys, psychiatrists and parents about this unsettling trend. Link in bio.",,,,,,,
https://www.instagram.com/p/CFNVma8BViP/,2020-09-16T19:01:19.000Z,Sidecar,1417,39,"Since the pandemic began, the SaveTheChildren hashtag, which used to be a legitimate fund-raising campaign for the 100-year old Save the Children charity, has been hijacked by QAnon followers spreading conspiracy theories. And it has started appearing more regularly in wellness and parenthood spaces online, which makes parents particularly vulnerable to falling down a dangerous rabbit hole. What can you do if you see misinformation being shared? Swipe ?紐?琉?for some practical ways to push back against falsehoods, and tap the link in bio to read more.",,,,,,,
https://www.instagram.com/p/CFLk93gBI6E/,2020-09-16T02:37:06.000Z,Sidecar,2645,53,"Kindergarteners in Minneapolis get hula hoops to maintain social distance. A student in Los Angeles starts school in her backyard. Kids in Colorado take online classes from a child care program at school, while teachers work from home. Over several weeks in August and September, @nytmag photographed students during the opening days of the academic year, capturing the wide variety in learning environments around the country this fall. 

Swipe ?紐?琉?and tap the link in bio to see more of these images; they accompany an important roundtable discussion of five experts about the lasting impact of this unprecedented period of upended education. 

?踰? @dguttenfelder, @davewoodyphoto, @trentdavisbailey, @erikalarsen888, @durzt and @angsmithers for @nytmag",,,,,,,
https://www.instagram.com/p/CFIlK4OBA51/,2020-09-14T22:41:10.000Z,Sidecar,2030,24,"When Dr. Alberto Paniz-Mondolfi was forced to flee Venezuela in 2019, he thought his work battling deadly epidemics would ease up. Instead, once on staff at Mount Sinai in New York City, he was thrust into the epicenter of the coronavirus pandemic. 

As more cases came in, he began to worry ??but not for the reasons everyone else did. He worried the medical community was underestimating the coronavirus???potential effects on children. Most U.S. doctors have ??뛢ver lived through a dengue epidemic,??he told @melindawmoyer in an interview. Now, the ??뻟rus hunter??is working to solve one of the more vexing Covid-19 mysteries using clues from his past: Why does the coronavirus, which largely spares kids, make a very small proportion of them very, very sick with a condition that has come to be known as multisystem inflammatory syndrome, or MIS-C? And why so often children who are Black? Or Latino, like him?

Tap the link in bio to read @melindawmoyer???story about Dr. Paniz-Mondolfi's fascinating work. ?踰? @nytchangster for The New York Times / via Dr. Alberto Paniz-Mondolfi",,,,,,,
https://www.instagram.com/p/CFFjs0dl4QR/,2020-09-13T18:30:37.000Z,Image,846,7,"Prince is 9 years old, ebullient and bright; he has spent much of the pandemic navigating the Google Classroom app from his mother???phone. The uncertainty and isolation of the coronavirus lockdown is not new to him ??he is one of New York City???more than 100,000 homeless schoolchildren, the largest demographic within the homeless population. Families like Prince???are largely invisible.

Samantha M. Shapiro, a contributing writer for @nytmag, has spent the last two years speaking with over a dozen homeless families with children of school age. You can now listen to her powerful narrated story on ""The Sunday Read"" at the link in bio. ??? @hokyoungkim_ for The New York Times Magazine",,,,,,,
https://www.instagram.com/p/CE_5paMgh1W/,2020-09-11T13:46:58.000Z,Image,802,13,"Give that paper towel roll its Beyoncé moment What was your #tinyvictory this week? Share it in the comments so we can all celebrate together. And remember, no victory is too tiny!",,,,,,,
https://www.instagram.com/p/CE-nv19DWRN/,2020-09-11T01:51:18.000Z,Image,3564,38,"It used to be a whole lot easier to *not* mom-shame, @rosemarycounter writes. ??톒e trick was to just keep your mouth shut.??Now, the stakes are higher ??one parent???actions can directly affect the health of the other???child. Everybody is scared. Nobody feels supported. ??톒is is being presented to us like we have choices when most of us really don?????said Biz Ellis, who hosts the podcast One Bad Mother. ??썀d when you don???have a choice, it???really easy to lash out at someone who seems like they did.??Or to feel guilt about your own decisions. However, as Rosemary says, the good thing about peak anything is that there???nowhere to go but down. Tap the link in bio for her full exploration of mom-shame in the pandemic. 

??? @juliannabrion for The New York Times.",,,,,,,
https://www.instagram.com/p/CE68oyoBBYp/,2020-09-09T15:36:51.000Z,Sidecar,3959,38,"As we slouch into Month 7 of the pandemic, the mental health impact on caregivers shows no signs of abating. ??톒is is a chronic destabilizing force to our lives, and to families and parents and children,??@womenshealthdoc, a frequent contributor to NYT Parenting, told @jessgrosewrites in an interview for this week's newsletter about the latest studies that show in no uncertain terms how stressed parents of young kids are. According to one survey, 63  percent of parents felt they had lost emotional support during the pandemic.

Jess collected advice from experts for how we can bolster our own mental health when the usual go-tos for self-care may not be available. For example:
?踰멗f there's no time for a traditional 50-minute (virtual) therapy session, maybe you can use an asynchronous therapy app or exchange a few quick texts with a friend to boost your mood. 
?夷?There may be a bit of support right underfoot (and, now, always underfoot): ??켩ople were finding their little ones to be a source of comfort,??one researcher told Jess. So, perhaps today is a good one for some midday family snuggles? 

Tap the link in bio to read more and subscribe. ?萸?
??? @sophilecuyer for The New York Times.",,,,,,,
https://www.instagram.com/p/CEtr7vDAWX_/,2020-09-04T12:00:48.000Z,Image,1488,15," It’s been a long time coming, but... What were your #tinyvictories this week?",,,,,,,
https://www.instagram.com/p/CEsOT-4hv4J/,2020-09-03T22:22:41.000Z,Image,897,17,"@chloeeeecaldwell, an author in New York, never wanted a dog, not even as a kid. But when her step-daughter Louise???school closed for the pandemic, the 10-year-old started having anxiety; she couldn???sleep, sometimes waking up five times at night, and b",,,,,,,
https://www.instagram.com/p/CEp2gkKhhun/,2020-09-03T00:16:13.000Z,Sidecar,2261,45,"For this week's newsletter, @jessgrosewrites asked experts how to help develop our kids??love of learning if they are on Zoom all day at home or abiding by strict social distancing rules in a classroom. Swipe ?紐?琉?to find out what they said we can all do to retain some joy ??and tap the link in bio to read and subscribe!",,,,,,,
https://www.instagram.com/p/CEm_XuvhTfQ/,2020-09-01T21:35:56.000Z,Image,2999,42,"Even before @sarahpragerbooks??kids were born, she worried about parental paperwork. It began with concerns about how she and her wife would be listed on their birth certificates, and then on their adoption paperwork. Then, baby music classes sign-ups and preschool documents. Almost all of the forms ask for information about a mother and a father. But, like the majority of American families with children, Sarah???family does not consist of two different-sex parents in their first marriage. She writes:

??턮mething about it hurts more than an off-the-cuff comment, knowing that the staff I trust with my children???development and regularly see at drop-off refer often to the paperwork and don???take the time to change it. Every time, seeing words that only apply to certain families underlines how the world is not yet set up for us.??
Tap the link in bio to read Sarah???full piece. #lgbtq #lgbtparents #???,Even before @sarahpragerbooks??kids were born",,,,,,,
https://www.instagram.com/p/CEkddLwjUs6/,2020-08-31T22:01:08.000Z,Image,2221,30,"Name a more iconic distance learning role model. Heading into Round Two of remote education, @laurenomics paid tribute to Ms. Frizzle, the ??oundlessly energetic and sartorially out-there??teacher in ??톒e Magic School Bus??series. As Lauren???6-year-old said, ??턧e???very crazy and her bus can turn into anything and go into the ocean or up people???noses.??So, who???in? Ready to channel ??봦e Friz??this fall? Link in bio for the full piece. ??? @elenikalorkoti for The New York Times.",,,,,,,
https://www.instagram.com/p/CEbzj-rAluS/,2020-08-28T13:21:08.000Z,Image,1119,29,"Perfect weekend activity, right?

What were your #tinyvictories this week? Remember, no win is too small.",,,,,,,
https://www.instagram.com/p/CEaiIFehaCd/,2020-08-28T01:29:30.000Z,Image,5303,63,"Christen Madrazo has been staying at her parents??house in Pennsylvania with her husband and their 13-month-old son for almost six months. They left their fifth-floor walk-up in Washington Heights temporarily to have more outside space and help with child care. ??톒ey say it takes a village to raise a child, and now that I can take a shower each day, I get it,"" Christen writes ""But you know what they don???say takes a village? A marriage.??She's found herself constantly micromanaging her husband, and realizing: ??즪ery single quarantine marital scuffle we??턤 had is linked, somehow, to my perception of my parents??approval of my husband, too ??which is really just about their approval of me.??

Tap the link in bio to read her wonderful essay. ?踰? @josealvarado for The New York Times.",,,,,,,
https://www.instagram.com/p/CEX4sM2BASp/,2020-08-27T00:48:57.000Z,Image,1080,8,"Jill Waldbiesser has gotten used to her 6-year-old son, who is deaf, heading into her room at 6 a.m. and asking for milk, or waking her up by roaring like a dinosaur ??but she is still surprised by his volume. She writes, ??컀 all the ways in which I was unprepared to raise a deaf child, dealing with a constant, sustained level of noise has been the least expected. And it has only grown more constant, and more noisy, since the pandemic began.??While excessive noise poses a certain risk to hearing, the more immediate problem, in Jill???and many households, is that it stresses parents out. And because it???invisible ??and many of us are already anxious about so much else ??it's often overlooked. 

Jill asked experts how to get kids to turn it down a notch, and says she is learning from her son to unplug and enjoy the silence in her own head. Link in bio for the full piece.",,,,,,,
https://www.instagram.com/p/CEVWi03hI8T/,2020-08-26T01:12:05.000Z,Sidecar,948,16,"Many migrant children living in limbo near the U.S.-Mexico border have little to no access to formal education. Volunteers like Andrea Rinco?n Corte?s, 21, have stepped in with creative ways to help. 

Andrea, whose father tried to cross the border in 1992, discovered @theschoolboxproject, an organization that brings educational activities to refugee children, and quickly proposed using their distinctive rainbow-colored school-bus-turned-mobile-classroom in Tijuana. For a few months in 2019, the project was a success. Then, Covid-19 made in-person learning impossible. Still, Andrea didn???give up; she founded her own non-profit, @internationalactivistyouth, to set up an internet connection at the shelter, provide equipment and train staff on how to teach online. Last month, they started virtual classes. 

For Andrea, it was always more than just offering classes to kids though. She wanted to make them feel that someone was looking out for them, she said. ??톒at they mattered.??
Myriam Vidal Valero and Rodrigo Pe?rez Ortega spent time with these impressive volunteers and the wonderful kids they??켩 teaching. Read their complete story at the link in bio. ?踰? Picture Alliance, via alamy; @guillermoarias for The New York Times.",,,,,,,
https://www.instagram.com/p/CERmvFNhHmr/,8/24/2020,Image,1768,27,"Before her son was born, @sheisimanib had hoped to breastfeed for two years, though she didn’t know how “physically and mentally taxing” it could be. Still, despite the sore nipples, she was grateful to be able to nurse her son who wouldn’t take a bottle. “Being a new mom and pretty much winging the whole role, I found it was breastfeeding that gave me that one moment of joy that said, ‘You did something right,’” she writes in an essay about her experience with extended breastfeeding.

Her intention turned into a 2.5-year-long commitment, and the journey became Imani’s muse. “I gave up the idea that I would be able to do a lot of things on my own with a breastfeeding newborn and living abroad with no family around — but I could write with him in my arms.”

Tap the link in bio to read the complete essay.",,,,,,,
https://instagram.com/p/CEJvWNIhQkv/,8/21/2020,Image,2989,74,"Now I just need to make room in the sink for that bowl.

What was your #tinyvictory this week? No feat too tiny. Share them below!",,,,,,,
https://www.instagram.com/p/CEH6-mslNAF/,8/20/2020,Image,982,2,"During the pandemic, parents are either stuck at home or navigating the logistics of a changed world, to say nothing of our looming school stress. And then there are our children who need another snack and another snack and what’s for lunch. This constant grind of keeping kids fed on top of overwhelming pressures can bring back troubling habits for parents with a history of disordered eating, like skipping meals, binge-eating and purging.

“At their core, disordered eating behaviors are coping strategies,” Lisa Du Breuil, a psychotherapist, told our frequent contributor @v_solesmith. “We are all living with this ongoing existential threat. Of course that’s going to show up in your eating.”

Link in bio for @v_solesmith's full piece on how to avoid falling into a familiar, difficult relationship with food during the pandemic.",,,,,,,
https://www.instagram.com/p/CEFrVyrBPjc/,8/19/2020,Sidecar,1018,20,"Back in December (remember December?), we decided to profile a diverse group of passionate home-schoolers. With almost 1.7 million children being home-schooled, according to the most recent national data, we wanted to share the many reasons parents were choosing this approach — from a disenchantment with mainstream academics, to a desire to pass on specific cultural values. Now, this series has become even more relevant. 👀 Swipe 👈🏽 to read what a few had to say and tap the link in bio for the full stories of nine home-schooling families across North America.",,,,,,,
https://www.instagram.com/p/CEDeKo5BTAW/,8/18/2020,Sidecar,1601,23,"“If you’re a parent of kids (who am I kidding: girls) and possess a passing interest in basic human rights and dignity, you most likely have been gifted some of the books I have come to call the You Go Girl Collection,” writes Rebecca Traister for @nytbooks. With some trepidation, she tackled a new crop in this genre, published to mark today’s 100th anniversary of the ratification of the 19th Amendment. Not all assuaged Rebecca’s anxieties about how children’s books could confront the “complexities and nastiness, the racism and classism, the defining incompleteness of the project” and still inspire. But her favorite, “Finish the Fight!” by staff at The Times led by @vvchambers, made Rebecca hungry for even more history books like all of those she reviewed, which put women at the center.",,,,,,,
https://www.instagram.com/p/CEAvcKaBd0q/,8/17/2020,Image,10000,330,"The Families First Coronavirus Response Act was enacted this spring to provide workers with expanded family and sick leaves for reasons related to Covid-19. But Joan C. Williams, who runs the Center for WorkLife Law at @uchastingslaw, says: “Employers are using the pandemic to get rid of mothers, and our attempts to protect them are failing.” During the pandemic, calls to the center’s hotline, which provides legal resources to help workers claim family leaves, increased 250 percent compared to last year. One mother who has no child care options for her 6-year-old and 8-month-old said, “I have been given two options: either resign or get fired.”

The Times is looking for working moms to share their stories for an upcoming report on what the pandemic is doing to women’s livelihoods. If you’d like to participate, fill out the form at the link in our bio where you can also find the full op-ed.",,,,,,,
https://www.instagram.com/p/CD3gbgADIUI/,8/14/2020,Image,2755,37,Privacy for all! What were your #tinyvictories this week?,,,,,,,
https://www.instagram.com/p/CD1zHpolNyD/,8/13/2020,Image,2474,72,"In the Before Times, people who were struggling to breastfeed didn’t have to look very far to get hands-on support. There were baby cafes and mom groups; visits from friends and family; and lactation consultants who made house calls. During the pandemic, those resources have mostly shifted online. For many new moms, nursing is a challenge and seeking help is crucial. Since August is National Breastfeeding Month in the U.S., @caron_nyt spoke with experts and new moms about how to get lactation support — which traditionally requires showing and touching the breast — in this new world of social distancing. Read more at the link in bio.",,,,,,,
https://www.instagram.com/p/CDzOey1Bjl3/,8/12/2020,Sidecar,3081,54,"Because many of us need to be home with our kids for the foreseeable future, @jessgrosewrites asked researchers why we respond physically when kids wail, even if we know they’re O.K. The problem, for those of us who need to get anything done each day, is biological. But if the kids are melting down without reason or another responsible adult is caring for them, you can give yourself a break. Link in bio for tips on how to tune the tantrums out.",,,,,,,
https://www.instagram.com/p/CDwIUs8gJbt/,8/11/2020,Image,2862,30,"Through her work as a psychiatrist, Christin Drake has learned ""exactly what to do to raise her children well."" In a moving essay on Black motherhood, she says she feeds their bodies and brains with “perfect” foods, manners, books, schools and neighborhoods. But the hopes Christin has for her 4-year-old son come with a nagging sense of dread. “I know just what this country can do to my son, and also that I have no way to undo it,” she writes. “Fancy life and all.”",,,,,,,
https://www.instagram.com/p/CDumWzzBBJ2/,8/10/2020,Image,4963,33,"A combination of dread, panic and sheer exhaustion. This is what @womensmentalhealthdoc says she sees on her patients’ faces when they discuss school options for their kids. As a psychiatrist, Dr. Lakshmin can’t tell us whether to send kids into schools (if they reopen), but she does have a set of coping skills for handling decision-making anxiety. And, since so many parenting moments can be fraught and scary, these are strategies that will serve you well into the future, pandemic or not. Link in bio for the piece.",,,,,,,
https://www.instagram.com/p/CDo5bO3hW8Z/,8/8/2020,Image,3027,54,"In trying to answer this question, Elliot Haspel delves into the history of care work in America. What he finds is both fascinating and maddening, and has to do with the way our society has devalued care, and misunderstood the importance of brain development in a child’s early years. Link in bio for the full piece.",,,,,,,
https://www.instagram.com/p/CDmMc7YANQk/,8/7/2020,Image,4173,114,Is this what it's like in heaven? What were your #tinyvictories this week?,,,,,,,
https://www.instagram.com/p/CDkLoVXjxT9/,8/6/2020,Image,1232,15,"There are two key ways you can get involved in your child's schooling without spending all day monitoring classwork, hiring expensive tutors, or losing sleep while wracked with guilt:
Figure out how your kids learn. Ask for more feedback from teachers.
This fall, we should rely on teachers and counselors more, says Jenny Anderson, a journalist focused on the intersection of education, technology and parenting. She looked into how to proactively prepare for the upcoming unprecedented back-to-school season for our newsletter. Tap the link in bio to read and subscribe. ",,,,,,,
https://www.instagram.com/p/CDckpnyBZll/,8/3/2020,Image,7732,107,"anyakamenetz finished writing her parenting book, “The Art of Screen-Time,” while on maternity leave, which she says “was kind of like writing up lab results before the experiment was finished.” Now Anya is rethinking the advice she used to give. Strict screen-time limits have gone out the window, and she's realized they were ""always largely the province of more privileged families."" But some of the principles Anya preached have shown their mettle in new ways in this new world. One to keep in your back pocket: Focus on your children’s feelings, not the screens. In this scary time, we can do that for them. Link in bio to read the full piece.",,,,,,,
https://www.instagram.com/p/CDaAJ43gmcL/,8/2/2020,Image,1494,28,"Should your kids attend in person if local schools reopen, and risk being exposed to the virus? Or should they do distance learning if that's an option for your family, and lose out on in-person instruction and potential social interaction?

No single factor can settle such a fraught decision. But new estimates, from researchers at the University of Texas at Austin, provide a rough gauge of the risk that kids and adults could encounter at school in each county in the U.S. Lauren Ancel Meyers, an epidemiologist who led the research team at @utaustintx, said their work was “meant to guide schools so they can anticipate when it might be safe, or easier, to open and bring kids in.”

If classrooms opened right now, the estimates show that large parts of the country would likely see infected students, depending on the area and the size of the school. You can use the interactive map at the link in bio to find out how many infected people might arrive in your county’s schools.",,,,,,,
https://www.instagram.com/p/CDUokTBhX0m/,7/31/2020,Sidecar,790,8,"Today is the first day of Eid al-Adha, and normally Lail Hossain and her husband, who live in Dallas, would have spent the past three weeks preparing to host an open house brunch for more than 125 guests. They would have served a feast of traditional Bangladeshi food like paya, eggs, saffron semolina halwa and Mughlai paratha. But with coronavirus cases rising in Texas, Lail had to change gears; she decided to bake Eid-themed cookies in the shapes of a masjid, camel and lamb and share them with essential service providers in the community. She also decorated the house with Eid garlands, masjid-shaped lights and festive lanterns.

“We want to instill the love of Islam in my daughter and make the Islamic festivals a real part of her life,” Lail says. She and her husband built Rida, 9, a tent to help her learn about different rituals of Hajj, including the tradition of staying in the “Tent City” of Mina Valley. “We want to create memories, and Covid-19 isn’t going to stop us from doing that.”",,,,,,,
https://www.instagram.com/p/CDT5pR3gpYL/,7/31/2020,Image,1556,27,"Do not pass GO, do not collect $200. Do get your space What were your #tinyvictories this week?",,,,,,,
https://www.instagram.com/p/CDRw4SFBPkk/,7/30/2020,Sidecar,1741,25,"Soon after her first baby was born, Crystal McAuley started imagining scary things that could happen to her infant: “What if the baby overheats?” “What if he stops breathing?” “What if he falls?” She was experiencing intrusive thoughts — negative thoughts or images that seem to come out of nowhere. The immense responsibility we feel for keeping a newborn alive can bring them on, especially during the first six months, and with the added strain of the pandemic they may last longer. Juli Fraga and Karen Kleiman looked into the research behind this phenomenon, and provided a set of steps to help reduce intrusive thoughts, including speaking up about them and getting support. Tap the link in bio to read their full piece.

If you are experiencing intrusive thoughts that interfere with caring for children, the authors recommend getting professional help, which can include psychotherapy, group support and medication, when necessary. ",,,,,,,
https://www.instagram.com/p/CDP4R0ohyeS/,7/29/2020,Sidecar,2435,22,"“Schedule: Bath time, Bed time, Fight fascists, Defend Black lives, Repeat.”

What started with a few dozen moms in Portland, Ore. has become a nationwide movement. Last weekend, @wallofmoms groups showed up at protests in Seattle, Oakland, Calif., Aurora, Colo. and Washington DC; more chapters are forming in Missouri, North Carolina, Alabama, Texas, Chicago and Maryland. @kdaniblum talked to the organizers and others about the critical role mothers have long played in American activism. Collette Flanagan, who founded Mothers Against Police Brutality after police in Dallas killed her son in 2013 said, “The power of being a mother, whether you have lost a child or not, is that because you’re a mother, you’re able to absorb another mother’s pain. That becomes a very powerful chain of resistance.”",,,,,,,
https://www.instagram.com/p/CDOsZinBYjg/,7/29/2020,Sidecar,876,15,"This is a staggering figure: Over 56 million families have lost income since March 13, 2020, according to the most recent Household Pulse Survey from the U.S. Census Bureau. Many are now struggling to afford basics, like diapers, wipes and formula. For this week’s newsletter, @jessgrosewrites spoke to parents in this situation and diaper banks who are straining to fill the void. Troy Moore, of @diapernetwork, said their locations are “distributing on average, 50 percent more diapers monthly to families in need.” Holly McDaniel, who runs the @austindiaperbank said, “This is going to be long-term chaos.”",,,,,,,
https://www.instagram.com/p/CDKYWMChZZj/,7/29/2020,Image,668,6,"As a widow who lives alone, Mimi White needed company, even virtual. The pandemic came only three years after losing her husband. “I think this threatening virus has shut me down just when life was coming back to me more fully,” she writes in an essay about teaching her 12-year-old grandson poetry, from a distance. His parents needed relief, and while she didn’t know if he’d want to write, she started simply — and he found his voice. Link in bio to read her full, lovely piece.",,,,,,,
https://www.instagram.com/p/CDE2ey3hwjC/,7/25/2020,Sidecar,1274,13,"Although play therapy has been around since the 1940s, a recent groundswell of public interest in trauma-informed care has led academics and practitioners to focus on its potential. Play therapy can reach children who have experienced ongoing stressors or multiple traumatic events in a way that talk therapy can’t, says Paris Goodyear-Brown, who co-founded Nurture House, a treatment center in Franklin, Tenn.

Some play therapists follow the child’s lead while witnessing and narrating. Others eventually take a more directive role, engaging the child in activities intended to teach something and reorient behavior. What unites them all is the belief that play itself is therapeutic. The toys, musical instruments or art supplies aren’t used to keep children busy or distracted while they talk through problems. Instead, play gives them an opportunity to “work out the trauma in their bodies.”",,,,,,,
https://www.instagram.com/p/CDCvHdeB4rA/,7/24/2020,Sidecar,1986,74,"Anyone else noticing ""pod mania?"" Faced with an uncertain fall, families across the country seem to be taking education into their own hands. But, as @melindawmoyer writes, experts and parents have concerns.

Alexis Kushner de la Peña, a Mexican-American mom who joined a pods Facebook group, noticed that most families in it were white and well-off. “We should all think about how pods might further the gap between our students. Families of underserved communities might not be engaging on Facebook, might not speak English, might not have means to pay, to drive, etcetera,” Alexis posted. It’s also likely that children with disabilities, learning differences or behavioral issues will be left out of pods.

Swipe for possible ways to mitigate these concerns. We'd also love to hear from you. What do you think about this practice? Is your family planning to pod up in the fall? (Link in bio for the full piece.)",,,,,,,
https://www.instagram.com/p/CDBbpZCg6h2/,7/24/2020,Image,4151,36,I believe that's called living the dream. What were your #tinyvictories this week?,,,,,,,
https://www.instagram.com/p/CDAcB9BBxx8/,7/23/2020,Sidecar,1217,8,"The challenges of pandemic parenting have hit home for elite athletes, and for moms in particular. As American professional sports return this summer inside “bubble environments” that limit outsiders, the players need to get back to work, but can’t necessarily secure child care. So, kids have become fixtures in the bubbles. Stephanie Cox’s daughters, 7 and 4, cheered her on at a match during the National Women’s Soccer League’s tournament being held in Utah. Jessica McDonald brought her 8-year-old son there, along with his own excellent jersey.
Children and families are not allowed in men’s league bubbles like this, partly out of concerns over the size of the operation and its cost. But those decisions, and the different ones in women’s leagues, are also a reflection of how American society largely treats child-rearing as the responsibility of women even as the workload takes a toll on their careers and mental health. Read more at the link in bio.",,,,,,,
https://www.instagram.com/p/CC_zEnjlgdK/,7/23/2020,Image,1165,5,"From backyards to schoolyards, the game-songs Black girls play predate Emancipation. Double-dutch, hand games and chants are a way to “learn how social relationships are negotiated within America’s racialized and sexist map of reality,” says @kyracatures, who has studied and written about the sophisticated culture of Black girls’ play for nearly 30 years. “Their musical blackness has much to offer once we unpack the magic in the rhythms and rhymes that animate their torsos and release their tongues with laughter.”",,,,,,,
https://www.instagram.com/p/CC80ix4FL31/,7/22/2020,Video,2890,21,"We’ve always wanted to report on how and why kids play. Then came the coronavirus, quarantine, nationwide protests over police violence, and a summer unlike any we’ve seen before — and this subject felt no less urgent. Without school, child care or play dates many parents were trying to fill their kids' days with fun (or at least keep them busy for a minute). Stuffed animals went to the “hospital” with a mysterious illness. Backyard games sold out nationwide. We wanted to understand more about how our kids are playing now.

The answers became a new collection of stories called “The State of Play,” which you can start digging into at the link in bio. We hope they delight you.",,,,,,,
https://www.instagram.com/p/CC6Wiupj-bF/,7/21/2020,Image,1885,16,"As protesters and the federal police clashed in Portland, Oregon, over the weekend, dozens of women locked arms and chanted, “Feds stay clear! Moms are here!” The “Wall of Moms” lined up at a demonstration last night as well, clad in yellow as a sign of unity, and stretching across a whole block, wrote Mike Baker, a Times reporter who was there. The group led a march towards the federal courthouse in Portland and began",,,,,,,
https://www.instagram.com/p/CC4ia5-juUZ/,7/20/2020,Image,2494,124,"When Kimberly Muñoz imagined the birth of her child, she saw herself screaming and clutching the hands of her husband and sister-in-law. Instead, she labored alone in a new 12-bed unit of a South Texas women’s hospital that was created for expectant mothers with coronavirus. ⁣⁣
⁣⁣
As this part of Texas, the Rio Grande Valley, battles virus outbreaks on “a straight up trajectory,” they’ve had to expand this labor and delivery unit twice. No guests are allowed into the facility. Each woman with the virus is provided a nurse to give her not just medical support, but also emotional support during labor. (In this photo, Bernadette Canezo, a registered nurse, is introducing Kimberly to her newborn.) Afterwards, the babies are taken away to be tested. The mothers aren’t able to see their babies for another 14 days, or until they test negative.⁣⁣
⁣⁣
@nytcaitlin, a national immigration reporter, and @lynseyaddario, a Pulitzer prize-winning photojournalist, spent a week embedded in Texas, reporting on the devastation this community has experienced. “I saw both new life and death at close range,” Caitlin says. “Both showed how high rates of poverty and chronic illness make the virus even more destructive.”",,,,,,,
https://www.instagram.com/p/CC3z8Wgh_hb/,7/20/2020,Sidecar,2936,81,"As U.S. school districts grapple with whether to reopen schools, Ginia Bellafante, The Times’s Big City columnist, says one possible stopgap isn’t getting enough attention: holding classes outdoors. A century ago, this was how schools beat plagues, she found. ⁣
⁣
In 1907, two Rhode Island doctors, Mary Packard and Ellen Stone, created an open air classroom in Providence to mitigate transmission of tuberculosis. The New England winter was brutal, but kids stayed warm with wearable blankets known as “Eskimo sitting bags” and heated soapstones at their feet. The experiment was a success by nearly every measure — none of the children got sick — and within the next decade there were dozens of open-air and outside schools around the country. In these photos:⁣
⁣
A classroom on a ferry in New York City, circa 1915. ⁣ A student keeping warm in an open-air classroom, 1910. Art class on a New York City roof, 1912. ⁣⁣ Public School 51 in Manhattan, 1911 ⁣ and wide-open windows keeping the fresh air flowing in the cafeteria there.⁣
⁣
“Distressingly, little of this sort of ingenuity has greeted the effort to reopen schools amid the current public-health crisis,” Ginia argues. To read more about how open-air classrooms once worked and why she thinks we should try outdoor schools, too, tap the link in bio.⁣ ",,,,,,,
https://www.instagram.com/p/CC0xZ75H9Dn/,7/19/2020,Image,2241,37,"When it was announced that New York City’s school system, the nation’s largest, would open on a part-time basis in September, it set off a new child care crisis. How can parents return to work when their children aren’t regularly in classrooms? And how can children return to the classroom if the people staffing their schools can’t return to work?
Across the U.S., policy-makers and parents are grappling with some version of these questions. Reopening schools is vital to undo the severe economic damage from the pandemic, but doing so before the coronavirus outbreak is contained could lead to more infections.
“Every way that you look at it, it feels impossible” to plan for fall, Emily James, a mom of two who teaches high school English in Brooklyn, said, perfectly summing up how many parents are feeling as districts scramble to decide whether schools will reopen — and what that will look like — in a matter of weeks. Tap the link in bio to read more about this developing crisis. ",,,,,,,
https://www.instagram.com/p/CCyu_WQFC4W/,7/18/2020,Video,2021,122,"Many adults remember being tickled in a way that made them feel annoyed, uncomfortable or even violated. Yet plenty of children, Jenny Marder’s 3-year-old daughter included, genuinely seem to enjoy it. So Jenny wanted to know, is it time to stop tickling? She asked experts about this semi-controversial form of play, why kids may be laughing when they’re not actually happy and signs to watch out for if your own kids might not be having as much fun as it seems. Tap the link in bio to read.",,,,,,,
https://www.instagram.com/p/CCvsAZ1D3JT/,7/17/2020,Image,528,24,Partly cloudy with a chance of winning Share your #tinyvictories below.,,,,,,,
https://www.instagram.com/p/CCtzGErgP_M/,7/16/2020,Image,776,5,"Paige Martin Reynolds says her house is “a mess of displaced possessions.” Her son who has autism has a penchant for bags, which has turned their home upside down — and has helped her understand the inner workings of his mind.

“One of Max’s great gifts to us is this insight. To have our house mirror his mind,” she writes. “Although I will never be able to see the world through his eyes, I feel like our home’s ‘migration abnormalities’ give me a glimpse into my boy’s brain. And with that glimpse comes the glimmer of understanding.”",,,,,,,
https://www.instagram.com/p/CCtSPQ0hhCd/,7/16/2020,Sidecar,874,9,"Meet Izzy, an essential worker — and a very good girl. For 8-year-old Everett Gray, who suffers from a rare heart defect, she has been a hero in recent months during the pandemic. When Everett woke up in March after a trip to the cardiac I.C.U. at Children’s Healthcare of Atlanta at Egleston, the hospital needed to put strict visitor limitations in place and suspend most of the activities that kids like Everett relied on to make a hospital stays more bearable. No more art cart, no more bingo.⁣
⁣
“Things were just being taken away,” his mom, Kelley, says. “But Izzy was still there.”⁣
⁣
Izzy is one of 15 full-time facility dogs employed by Children’s Healthcare of Atlanta’s Canines For Kids program. Some studies suggest that interacting with these trained therapy dogs can help pediatric patients for a number of reasons -- from improving blood pressure after surgery to reducing pain and stress during blood draws and even elevating their mood.⁣
⁣
“We were so lucky that Izzy was considered essential,” Kelley says. “Because to Everett, Izzy is essential.” To read about how Izzy and her colleagues are helping kids during the pandemic, tap the link in bio. And yes, there are more cute puppy pictures",,,,,,,
https://www.instagram.com/p/CCrPebGnAU3/,7/15/2020,Image,7808,240,"Working moms, if it feels like your family’s entire world is sitting on your shoulders during the pandemic, it’s because it probably is. A new study comparing dual-income couples before and after shutdown shows just how uneven the division of labor can be, even for women with active, present partners. Tap the link in bio to read, and let us know how you handle household responsibilities when you’re working from home with kids in the comments.",,,,,,,
https://www.instagram.com/p/CCo-Regl5AZ/,7/14/2020,Image,1113,48,"Nannies wanted. Antibodies preferred? Nicolette Setola, 32, a nanny based in Charleston, S.C., is one of many caregivers reflecting on how much they’re willing to divulge or sacrifice for a job. Families are looking for applicants who have already had coronavirus, and medical records to prove it, and are asking those they hire to sign restrictive contracts. ⁣
⁣
Nicolette turned down a live-in position with a family, whose daughter was born with lung problems, because they asked her to stay in the house for however long the pandemic lasts. She was reluctant to give up socially distanced activities with her own friends and freedom to move about. “We also need support in our life that doesn’t come from our employers or the children,” she said.⁣",,,,,,,
https://www.instagram.com/p/CCmazIoBL24/,7/13/2020,Sidecar,6189,200,"Thinking of starting a quarantine pod with another family? Swipe to learn how to do so safely, and tap the link in bio to read the full article by @melindawmoyer",,,,,,,
https://www.instagram.com/p/CCkC1i1jo9z/,7/12/2020,Image,3462,89,Is sex dead for parents? Is it? Link in bio for the full essay.,,,,,,,
https://www.instagram.com/p/CCgtizDJGBt/,7/11/2020,Image,731,7,"If Black parents are unable to care for their children, the first person they turn to is often a relative — usually their own parents — to make largely informal adoption arrangements. This practice, known as “kinship care,” dates back to pre-colonial Africa, and according to a 2018 research study by the AARP, remains common. Black grandparents are more likely to take a hands-on role in raising their grandkids and are significantly more likely to be their primary caregiver than within the general population.⁣
⁣
In a gorgeous and informative essay, @iamnefertitiaustin writes about her own experience with kinship care, being raised by her grandparents. ⁣
⁣
“My parents did not possess the emotional maturity to stay still long enough to raise children,” she writes. “As a child, I understood that my grandparents’ intervention was the best outcome of a precarious situation, and this dynamic laid the foundation for my becoming a mother through adoption.” Tap the link in bio to read more. ⁣",,,,,,,
https://www.instagram.com/p/CCdgNvenYOn/,7/10/2020,Image,2972,77,"""We leave paper and a marker in her bed and she writes down questions until she falls asleep. Then we go over the questions during breakfast when I’m fully caffeinated."" What were your #tinyvictories this week?",,,,,,,
https://www.instagram.com/p/CCbgvP4Befe/,7/9/2020,Sidecar,1163,17,"When her daughter Chelsea was 14 months old, Monica Coenraads’ life was upended. Her baby was diagnosed with Rett Syndrome, one of about 7,000 known rare diseases. Fewer than 200,000 people nationwide are affected by each of them, and 95 percent have no known therapies. They’re also often overlooked by scientists, and a lack of research can leave doctors puzzled on how to treat them. ⁣
⁣
Chelsea is now 23 and, over the last two decades, Monica has encouraged and propelled research into Rett Syndrome on behalf of her daughter; she also coaches other parents of kids with rare diseases to become advocates. “We have no choice. We are desperate parents. We have children with horrible diseases,” she told Gina Kolata, who profiled Monica and three other families fighting for more research into rare conditions. Tap the link in bio to read their stories.",,,,,,,
https://www.instagram.com/p/CCYsKQvHqos/,7/8/2020,Image,2605,31,"For couples fortunate enough to work from home, “us time” is in no short supply these days. So why might we feel so distant from our partners? “We don’t have any stories to tell each other about our day because we lived the same day,” a friend told @jessgrosewrites. “We don’t have questions for each other because we know the answers.”

To find new ways to feel warmly toward her husband, rather than just “passing him in the hallway like a co-worker at the world’s most existentially depressing office,” Jess spoke to two therapists and the author of a best-selling book about relationships to figure out how we can all breathe fresh air into our relationships during this moment of infinite togetherness. Tap the link in bio to read and subscribe to our newsletter.",,,,,,,
https://www.instagram.com/p/CCWfU6xhdWT/,7/7/2020,Sidecar,2365,37,"“Children with autism express themselves truthfully regardless of the social consequences. I know, because I am autistic,” writes Madeleine Ryan, in an open letter to parents of kids with autism. She urges them to embrace their children for who they are, to stop people who “are going to ensure that those on the spectrum are seen as a problems.“ “When you defend your child’s honesty and expressiveness, you’re defending honesty and freedom of expression for every human being,” she says. Tap the link in bio to read Madeleine’s letter.",,,,,,,
https://www.instagram.com/p/CCT_1I5hCmt/,7/6/2020,Sidecar,3944,79,"Last fall, we published “The Rage Mothers Don’t Talk About,” a personal piece by @momlists about the unrestrained anger many women experience during pregnancy, postpartum and beyond. Today, it is one of our most-read pieces. “I expected Twitter-hate,” Minna writes in a new follow-up. “What I did not expect were the many emails I received from mothers around the world, saying they too struggle with mom rage and my story made them feel less alone.”

Since stay-at-home orders went into effect months ago, the number of emails Minna receives has only increased. To offer guidance for these stressful times, Minna spoke to experts about how to calm mom rage as the pandemic continues. Swipe 👈🏼 for some quick tips to feel less angry in the moment, and tap the link in bio to read the full article.",,,,,,,
https://www.instagram.com/p/CCRQoVzD4jX/,7/5/2020,Image,1434,36,"
Breaking up is hard to do, especially when it’s with a friend who has seen you through the deeply vulnerable first years of parenthood. The bond formed between new mothers is special, and many of those friendships do go the distance. But others can often be complicated by big emotions — from confusion to grief — when they don’t turn out as expected.

@laborofloaf spoke to psychologists and moms about how to cope when the person you used to count on for a bleary-eyed, 1 a.m. text convo leaves you on read. One tip we loved: Ask yourself what kind of friendships you need in parenthood, and how you can form those, rather than pursuing relationships that you have been convinced are necessary. For more advice, tap the link in bio.",,,,,,,
https://www.instagram.com/p/CCN8M66DQP0/,7/4/2020,Image,549,8,"You may not be celebrating the Fourth of July how you typically would, but if you have some cookies and strawberries on hand, this year’s subdued festivities can be just as sweet. Kids will love helping make this gorgeous strawberry pie from @samanthaseneviratne on @nytcooking. Put them on cookie-crushing or strawberry-mashing duty after breakfast and the pie will be ready to pull out of the fridge just in time for the fireworks. Have a safe (and delicious) holiday!",,,,,,,
https://www.instagram.com/p/CCMOE9lBEHK/,7/3/2020,Sidecar,1397,17,"As states reopen and coronavirus cases surge, families face differing and sometimes contradictory rules for social distancing, along with a myriad of opinions within their communities about just how seriously to take those rules. As a result, many families have found themselves out of sync with their neighbors, which can be stressful to navigate as a parent and heartbreaking for children who feel left out. @caron_nyt spoke to parents across the U.S. who are trying to decide for themselves when and how to re-emerge into the world, if at all. Tap the link in bio to read.",,,,,,,
https://www.instagram.com/p/CCLe6myHz7E/,7/3/2020,Image,2476,62,A truly tiny (sock) victory. Share your #tinyvictories below!,,,,,,,
https://www.instagram.com/p/CCJluTGl0IJ/,7/2/2020,Image,12000,245,"This primal scream on behalf of working parents across the U.S. by @debperelman will have you highlighting every other sentence, it's that real. Tap the link in bio to read, and let us know your thoughts in the comments.",,,,,,,
https://www.instagram.com/p/CCJP4DkH-_I/,7/2/2020,Image,2369,140,"The Babysitters Club fans, assemble! If you were deeply invested in the trials and tribulations of Kristy Thomas, Mary Anne Spier, Claudia Kishi and Stacey McGill growing up, this essay from @galbeckerman is for you. As a kid, Gal was obsessed with the series, despite it not being a ✌🏼 typical ✌🏼 choice for boys.

As he revisits the books with his daughters, Gal writes about how he's been struck all over again by the depth of the series, including how it deals with “the slippage between how things are and how you want them to be, hanging out on that threshold between the dreaminess of childhood and the compromises of adulthood.” He also spoke to @goraina and Rachel Shukert who are behind the newer graphic novel and Netflix adaptations, respectively, about what makes The Babysitters Club so special and enduring. Will you share these books with your kids? Tap the link in bio to read Gal's essay.",,,,,,,
https://www.instagram.com/p/CCHf0_sHFqs/,7/1/2020,Image,1191,23,"Black families were hit hard by the pandemic. The effects on children may be lasting. Kourtney McGowan, pictured here with her 8-year-old son, was furloughed in March after the California preschool she worked at closed. When her workplace prepared to reopen, she asked her boss for a more flexible schedule to accommodate a lack of child care. Her boss said no, and she was replaced. Her son, who she said is unaware of their financial hardship, is suddenly anxious about death and dying. He’s in counseling, and she’s thinking about going back to college. ⁣
⁣
In the U.S., 1.7 million Black women like Kourtney have been left without a job during the pandemic. The majority of Black mothers are the primary breadwinners for their households, and the hardships that poverty places on children, like food and housing insecurity, can cause them to experience toxic stress that takes a toll on their developing minds and bodies. Paired with the stress of experiencing systemic racism, it can be a dangerous combination, experts say. ⁣
⁣
“We do what we got to do,” she said. “Raising Black boys is hard in itself. I’m just trusting God.” Tap the link in bio to read more about how the pandemic is disproportionately affecting Black families. ",,,,,,,
https://www.instagram.com/p/CCG9ZmBhyEv/,7/1/2020,Image,2774,29,"The desire to be perfect can be crippling for just about anyone, but especially for young children. @jessgrosewrites became more aware of her daughter’s perfectionist tendencies, which mirrored her own, the more time she spent with her because of lockdown. At first, she used the tried and true advice about teaching children to accept failure, like praising her focus and telling her about times in her life when she failed and it was OK.⁣
⁣
But when that didn’t move the needle, and her daughter’s despair over minor setbacks seemed to get worse, she knew she needed to address the problem at its root. So, for this week’s newsletter, Jess spoke to a child psychologist, a research psychologist who focuses on perfectionism and an educator to figure out how best to support children who strive to be perfect. The first step: Listen and absorb your tiny perfectionist’s feelings before rushing to address them. Tap the link in bio to read and subscribe. ⁣",,,,,,,
https://www.instagram.com/p/CCCCbfvBWov/,6/29/2020,Sidecar,452,1,"Growing up as a young, queer woman, Stephanie Fairyington didn’t think the traditional roles of wife and mother were in her future. All of that changed when she met her spouse, Sabrina, and they had their daughter, Marty. But there was still one thing she never anticipated: becoming a stay-at-home mom.⁣
⁣
Enter the pandemic. When day cares closed and forced her into full-time parenting, Stephanie was “prepared to die of ennui or lose my sanity entirely,” she writes in an essay for NYT Parenting. But a few months into her new role, she found delight in learning who her daughter was beyond the fleeting moments they’d spent together between work and school, and how best to parent her … which sometimes means using a furry, green puppet monster named Scraggy (a hero, pictured) to encourage broccoli consumption and potty-training. Tap the link in bio to read her essay on embracing full-time motherhood.",,,,,,,
https://www.instagram.com/p/CB-l9cHDGM2/,6/28/2020,Image,2057,68,"After her 5-year-old came down with a rash a month into a careful quarantine, @melindawmoyer had one simple question: How are kids still getting sick in lockdown? They’re not going to school, not seeing their friends and some are barely going outside. Melinda spoke to pediatricians and other parents about why your garden variety childhood ailments still seem to be around, even flourishing, despite all the social distancing. The answer? Bodies are … way grosser than we give them credit for. Tap the link in bio to read the full article.",,,,,,,
https://www.instagram.com/p/CB9VT42BLBT/,6/27/2020,Image,5395,390,"So much is different these days, but a few things remain the same ... like babies being impossible to get to sleep. What tricks do you use, or did you use when your kids were small? Let us know in the comments.",,,,,,,
https://www.instagram.com/p/CB5d8qYAVmP/,6/26/2020,Image,742,13,Now if we could just train them to take out the trash ... Share your #tinyvictories in the comments!,,,,,,,
https://www.instagram.com/p/CB3O1j9hDdG/,6/25/2020,Sidecar,1297,25,"It doesn’t take an expert to tell you that relationships can flourish — or wither — in times of stress. Add stir-crazy kids with little to no daily structure, the physical and emotional toll of a pandemic and global protests on top of that, and you have the perfect storm of chaos to upend the status quo in your household. ⁣@nytgender wanted to know how people who have been isolated at home together have fared. What had they learned, about the other people or themselves? How had they fought, or made up? Tap the link in bio for 18 stories of what so much togetherness looks like.⁣",,,,,,,
https://www.instagram.com/p/CB08212hhU5/,6/24/2020,Sidecar,1943,37,"The parental burnout is real. You know it, we know it, and now, we're all bracing for a cruel, cruel summer A survey from the American Psychological Association found that while 69 percent of parents were looking forward to the school year being over, 60 percent have “no idea how they are going to keep their child occupied all summer.” For tips on how to preserve your sanity over the next few months, swipe 👈🏼 to read the thread, and tap the link in bio for more on how to recognize and treat burnout.",,,,,,,
https://www.instagram.com/p/CBy5ovFBOlT/,6/23/2020,Sidecar,1594,37,"Like many New York City families, LaToya Jordan, her husband and their two children have no green space by their apartment. Normally, she’d rely on the city’s playgrounds and parks to get them out into nature, but closures and social distancing concerns during the pandemic have eliminated those possibilities. She says the adverse effects on her kids’ behavior are palpable. “Both of them are more moody and cranky,” she said.⁣
⁣
Richard Louv, a journalist and the author of “Last Child in the Woods: Saving Our Children from Nature-Deficit Disorder,” was the first to give this predicament a name. While Nature-Deficit Disorder isn’t a medical condition, researchers have found spending time in nature is vital for a child’s psychological and physical well-being. If a long nature hike isn’t an option for your family, don’t panic; there are other, simpler ways to help. How have you handled getting your kids outside time? Tap the link in bio for Meg St-Esprit McKivigan’s complete piece.",,,,,,,
https://www.instagram.com/p/CBybAXphnK0/,6/23/2020,Video,658,18,"Opinion: Parenting During a Pandemic

How has pandemic parenting been working for you? Based on our comments these past three months, we’re guessing many of your answers are: “not great.” If so, you’re certainly not alone. In this video for @nytopinion, three families share what it has been like to work, parent, educate, eat, sleep and hang out while jammed under one roof for three months straight. In the words of 5th grader Lena Paul, “At this point, things are getting annoying.",,,,,,,
https://www.instagram.com/p/CBwBQCuBhOS/,6/22/2020,Sidecar,959,8,"When the pandemic forced St. Mary’s Hospital for Children in Queens to suspend visitation, the hospital made an unusual offer to some families: One parent per child could move in, as long as they didn’t leave. Twenty moms and two dads took them up on the offer, and most now have been there for three months, sleeping on recliners, sharing a single shower and becoming immersed in their children’s care.⁣
⁣
“It’s been a loop of emotions — learning trach cares, vent settings, plus learning Noa’s patterns,” said Sheronda Patton, one of the moms staying with her baby, who weighed just 1 pound, 4 ounces when she was born a micropreemie in the fall. Sheronda wrote in her journal “I’m beyond exhausted.”⁣
⁣
For those parents who left spouses and other kids at home, it’s been a difficult sacrifice. Patty Agurto, whose 18-year-old daughter Taylor requires a feeding tube and ventilator, has two older children she can only interact with through the lobby windows. “I see my kids,” she said, “through the glass.” ⁣
⁣
But many of these parents are grateful for the time they get to spend with their hospitalized kids. Poonam Pathak used to wake up yearning to be with her 2-year-old daughter, who needs daily ventilator support. “Here, every day I see Christine,” she said, describing walking with her daughter and holding her as “the best moments of my life.” ⁣
⁣
Though a few parents did leave the hospital eventually, the ones that remain have created a sense of community within the walls of their children’s units. ",,,,,,,
https://www.instagram.com/p/CBtXvDMhwhg/,6/21/2020,Sidecar,967,4,"In his new book, “When We Free The World,” civil rights activist @kevinpowellinbrooklyn includes a heart-wrenching letter to the child he one day hopes to have. It is about how to survive in a world filled with fear, violence, sexism and racism, yet offers a glimmer of hope for the future. Tap the link in bio to read our exclusive excerpt.",,,,,,,
https://www.instagram.com/p/CBsg4bFHNUG/,6/21/2020,Image,2153,34,"Does becoming a dad mean losing your edge? That’s the question @erikvance, an NYT Parenting staff editor who used to travel the world as a reporter — and was 700 (!) miles away when his wife went into labor — examined in a personal piece for #fathersday. “I’ve been at this for four years now, and I’m just starting to understand how I have changed,” Erik writes. In search of answers, he turned to of the two most adventurous dads he could think, a mountaineer and a deep sea diver, to ask if having kids changed their lifestyles and, if so, what made the sacrifice worthwhile? His full essay is at the link in bio.⁣
⁣
Is there a dad in your life who this might resonate with? Let them know in the comments, and from all of us at NYT Parenting, Happy Father's Day! ",,,,,,,
https://www.instagram.com/p/CBrP64vB178/,6/20/2020,Sidecar,1764,19,"This Father’s Day, many families will be celebrating dads who have become primary caretakers. Young Choi, 47, is one of them. He used to put in long hours as a barber in Baltimore, but when coronavirus hit, he couldn’t work, his wife had to move her physical therapy practice online to stay afloat and their 18-month-old daughter’s day care shut down. Overnight, Young turned into chief parent, teacher and “boo-boo healer,” and though it’s been challenging, he says he’s rediscovered his daughter.⁣
⁣
“They are surviving by taking it a day at a time, with so many beautiful moments sprinkled in between,” says @rosemmorton, a photojournalist who is a friend of the family. She took these photos over the course of two days to document how their lives have changed.⁣
⁣
The family doesn’t plan on falling back into their old patterns, where Mom does most of the caretaking, any time soon though. “I want to do this and be involved and be a better parent and a better father,” says Young. ⁣",,,,,,,
https://www.instagram.com/p/CBoMdx1lCQS/,6/19/2020,Image,1788,23,Priceless. What were your #tinyvictories this week?,,,,,,,
https://www.instagram.com/p/CBnfHKMhQhI/,6/19/2020,Sidecar,2531,31,"Today is Juneteenth, an annual holiday commemorating the emancipation of enslaved African Americans in the United States, less than two centuries ago. Despite marking a significant moment in American history, the day doesn’t appear to be taught in schools. “Juneteenth wasn’t mentioned in my school textbooks,” Maya Phillips, the Times’ arts critic fellow, writes. “And I, as a young black woman, didn’t know anyone who observed it.” ⁣⁣
⁣⁣
Now, amidst nationwide protests over police brutality and the deaths of George Floyd, Breonna Taylor, Ahmaud Arbery and other African-Americans this year, there’s been renewed interest in a day that celebrates freedom.⁣⁣
⁣⁣
How best to teach children about Juneteenth and celebrate? We can start with books. As pediatricians and childhood psychologists say, making sure your home library has books that tell black people’s stories is one of the most important ways to keep an open dialogue about race. Here are three great reads to start with. We also recently asked you for your favorite inclusive children’s books, and have included some of the top responses to keep the momentum going. ",,,,,,,
https://www.instagram.com/p/CBlppPLAwY4/,6/18/2020,Image,832,3,"cherissmay, a freelance photojournalist in Washington, D.C., was heartbroken when she heard how her young relatives were processing the news of George Floyd’s death. But when her cousin, their father, J. Jioni Palmer, organized a protest for families to attend together, it became a teachable moment. First, J. Jioni and his son Middleton, 8, marched from their home to a busy intersection, holding signs that read: “A Man Was Lynched.” The next day, Palmer’s wife, Ashli, and their other son, Caldwell, 5, joined. Cheriss picked up her camera and began documenting her family. By the third day, more than 20 people had joined — and within a week, there was a crowd of 60, many of whom were children.⁣",,,,,,,
https://www.instagram.com/p/CBiy9fOn1Ms/,6/17/2020,Image,728,20,"In a moment that’s magnified just how much is out of our control, those who are lucky enough to have some disposable income might find themselves “impulse buying.” @kaitlyngreenidge, one of our frequent contributors, certainly has, though she says growing up poor means every purchase she makes as an adult is fraught. In this week’s newsletter, she writes:
⁣
“I had hoped adulthood, relative financial stability and parenthood would cure me of this anxiety. I did not want to pass it on to my daughter or have her live in the tense atmosphere of it. But then quarantine and protests and all of a sudden it felt like my anxiety around purchases was justified. I have never bought more things on a whim than during this time: baby-sized tool kits, baby-sized musical instruments and so many novelty onesies.” ⁣
⁣
What’s your experience been like? Have you made any impulse buys these past few months? Or is shopping the last thing on your mind? Let us know in the comments and tap the link in bio to read and subscribe to our newsletter. ⁣",,,,,,,
https://www.instagram.com/p/CBf-_6VBI0V/,6/16/2020,Sidecar,2441,30,"While there’s never a perfect time to have a baby, deciding to grow your family in the shadow of a pandemic is especially fraught. @caron_nyt spoke to households across the country about how they grappled with family planning during the coronavirus outbreak, each balancing their hopes against uncertainty. Swipe for quotes from some of their responses and tap the link in bio to read the full piece.",,,,,,,
https://www.instagram.com/p/CBd451Lgc5s/,6/15/2020,Sidecar,6028,70,"Last week, a different kind of protest was held in Brooklyn. It was for children, dedicated entirely to their voices. Maebel Gebremedhin, 33, a mom to three black boys, organized the event with @warriorsinthegarden, an activist collective. ⁣
⁣
“I’m black and I’m proud,” said Manguc, Maebel’s 11-year-old son, when he spoke in front of the crowd of hundreds, with kids of all ages. There was no set list of who could get up to the podium. The kids took turns, with the littlest ones using a step stool so the crowd could see them. ⁣
⁣
After about a mile of marching, there was pizza, snacks and a few naps. “It was nice to march with people who look like me and people who support me,” said Tiffany Williams, who brought her 7-year-old, Preston. “It was even better to march with my son.”⁣
⁣
Swipe to see photos from the day and tap on the link in our bio for more about the Children’s March in Brooklyn.",,,,,,,
https://www.instagram.com/p/CBalo_BBh9e/,6/14/2020,Sidecar,2097,26,"What happens when two people who can’t sleep have a baby who also doesn’t sleep? Comedian @birbigs (a sleepwalker) and his wife @jhopestein (an insomniac) found out after bringing home their daughter Oona (a newborn). In an excerpt from his new book, ""The New One: Painfully True Stories From a Reluctant Dad,"" Mike paints a hilarious and sleep-deprived picture of the first year of new parenthood that eventually spun totally out of control.⁣
⁣
He writes of those first days: “Now I sleep in a straitjacket in a room that’s chain locked from the inside, filled with cat litter dust and super-pee, and every morning I’m awoken by a wild animal trying to murder me in my sleep.” Tap the link in bio to read.",,,,,,,
https://www.instagram.com/p/CBWR5kXhhH3/,6/12/2020,Sidecar,3331,114,"When will life return to normal? “Well, it depends,” is what most epidemiologists say. “That's really our slogan,” says Melissa Sharp, who has made a hobby out of epidemiology-inspired needlepoint. But in their personal lives, the experts are making decisions about when to resume everyday activities, just like the rest of us. ⁣
⁣
The Times asked 511 epidemiologists when they would send children back to day care, camp and school. Of the 304 that responded, answers ran the gamut, from raring to go to reluctance. To see the complete survey results and commentary, tap the link in bio.",,,,,,,
https://www.instagram.com/p/CBVaWbjnnbx/,6/12/2020,Image,4010,91,The best way to ensure maximum coverage. Share your #tinyvictories below!,,,,,,,
https://www.instagram.com/p/CBRikHsKBC7/,6/10/2020,Image,1630,71,"The small-business loans day cares were relying on are expiring, rising unemployment rates are making it harder for parents to make payments and essential workers with small children are suffering. Now, two major child care providers — Bright Horizons and KinderCare Learning Centers — have closed hundreds of their locations across the United States, with more centers and home day cares that could quickly follow suit, according to a harrowing report by the Center for American Progress.⁣
⁣
Adrienne Keener, a neurologist, is one of many healthcare workers who depended on Bright Horizons for child care. She was left scrambling to find another option for her 4-year-old daughter after receiving an email stating that her center would be closing just a few days later. “As America wants to open up and get back to work without considering child care, it’s not going to be feasible for a lot of families, especially with younger kids,” Adrienne said. ⁣
⁣
Link in bio for more on the scale of these closures and what parents are doing to cope. | Reporting by Emily Sohn. ⁣",,,,,,,
https://www.instagram.com/p/CBOVsPij-Uu/,6/9/2020,Image,1628,29,"Sarah Kunz of Seattle has been making family dinners for her five children for nearly 25 years. She figured out a formula early on and never deviated from it. “I make one meal and let everyone serve themselves, so every kid chooses which parts of dinner to eat or not. They put back what they don’t want or give it to someone else,” she told @vsolesmith, our frequent contributor on all things feeding.⁣
⁣
Experts say sharing one big meal can take the pressure off of families with a wide range of eating preferences — especially now, when many of us are eating more meals at home together than we ever imagined possible. To learn more about the benefits of family style eating (including how to avoid way too many dirty dishes), read Virginia’s piece at the link in bio.⁣",,,,,,,
https://www.instagram.com/p/CBMa4Q5h0n_/,6/8/2020,Sidecar,1196,3,"“Black boys from Mississippi know the Black boys from New York,” @kieselaymon writes in a meditation on black boyhood and summer. Separately, @photodre, a photojournalist, has documented how boys experience summer in New York City, from 2015 to 2020. The two artists’ work was paired in “The Look,” a Times column that examines identity through art.⁣⁣
⁣⁣
In his piece, Kiese remembers the boys from New York who visited relatives in Mississippi each summer — and bonding over the experiences that separated and connected them all. He writes: ⁣
⁣
“We all knew something, too, and what we knew was more than short trailers and shotgun houses, more than magnolias and pines trees, more than semi-trucks filled with chickens headed to be slaughtered at the plant. We knew another way for Black boys in America to say I love you and I am afraid. And we kept saying I love you and I am afraid in as many different ways as we could that Saturday in the summer until it was time for New York to go home.”⁣ ⁣",,,,,,,
https://www.instagram.com/p/CBLHtQEFHAo/,6/8/2020,Image,1070,19,"With kids spending way more time at home this summer (and likely with less supervision), it’s important to make sure your house is as safe as possible. It might seem overcautious, but a whopping 40 percent of all accidental injuries among newborns to 19-year-olds occur between May and August, according to the Centers for Disease Control. We consulted safety experts about hazards in and around the home and how best to prevent accidents this summer. Tap the link in bio to read.",,,,,,,
https://www.instagram.com/p/CBI4GuxFXwT/,6/7/2020,Image,1377,16,"Research is limited, but studies have shown that same-sex couples fight healthier — and smarter — than different-sex couples. Is there really a lesbian way to fight though? Or a way to address conflict that is specific to gay men? @caron_nyt asked experts and couples for their thoughts and gleaned a few constructive methods to handle disagreements along the way. One key reminder: Strive for equality in your relationship. Same-sex couples don’t have traditional societal roles defining which tasks each member of the couple should perform, which allows them to create their own dynamic. To that end, straight couples should negotiate and discuss their roles more and not just in terms of who is the breadwinner. Tap the link in bio to read. ",,,,,,,
https://www.instagram.com/p/CBGVgs4BHiu/,6/6/2020,Image,3363,20,"Many children are feeling sad right now. They’re missing friends, teachers, play practices and birthday parties. Some are even mourning people they've lost to Covid-19.

If you’re concerned about how your kids are dealing with quarantine, @melindawmoyer spoke to experts about how to help. The first step: Remember that it’s O.K. and understandable for kids to be sad right now, and that it’s not your job to rescue them from their feelings. Instead, focus on helping them learn to live with them. ⁣
⁣
If you think your child is showing signs of a more serious mental health issue, you may want to consider getting professional help. You can start by contacting your pediatrician and asking for referral suggestions. Tap the link in bio for Melinda’s full piece with more guidance. ⁣",,,,,,,
https://www.instagram.com/p/CBEdqCGB5Qs/,6/5/2020,Sidecar,7848,337,"This one’s for the grandparents. After Tara Parker-Pope, the Times’s Well columnist, wrote about when it would be safe to see grandkids, she heard from many in anguish about not being able to hold them. “So many [grandparents] told me that life on indefinite lockdown, without hugs and time with family, is just not worth living,” she says. With that in mind, Tara turned to scientists, including one of the world’s leading experts on airborne disease transmission, to learn the safest way to hug during a viral outbreak. A quick breakdown:⁣⁣
⁣⁣
DO ⁣⁣
Let children hug you around the knees or waist⁣⁣
Hug facing opposite directions⁣⁣ . Kiss your grandchild on the back of the head⁣⁣
⁣⁣
DON’T⁣⁣ Hug with cheeks together, facing the same direction.⁣⁣ Hug face-to-face⁣⁣
And try not to cry. Tears and runny noses increase risk for coming into contact with more fluids that contain the virus. ⁣
⁣
The risk of a quick hug with these precautions is very low but not zero, so just be sure to choose your hugs wisely.",,,,,,,
https://www.instagram.com/p/CBDm0Q4DBBx/,6/5/2020,Image,3484,31,Let's recharge those hugs and kisses. Share your #tinyvictories below. ,,,,,,,
https://www.instagram.com/p/CBBHbZqF0x9/,6/4/2020,Image,3126,59,"Women have been largely saddled with the burden of child care during the pandemic, and experts worry reopening will make things even worse for working moms, especially those who are single. If you’re trying to balance increasing demands from your job — or your partner’s — without child care, you know all about the tradeoffs. ⁣""It’s just too intense — I’ve thought about nothing else,” said Karin Ann Smith, a single mom from Jupiter, Fla. who was laid off from her job with the Department of Education in mid-March. “There’s no help. There’s no break. When you’re worried about keeping a roof over your heads, when it’s something that fundamental, you can’t worry about anything else, like whether your career is on track or your résumé is good.” Tap the link in bio for more on the painful shifts occurring in households across the country, and what it might mean for the future. ⁣",,,,,,,
https://www.instagram.com/p/CA_Zx2tl6aA/,6/3/2020,Image,1608,21,"Loving and supporting my nonbinary child who they are is the easy part.
For @sandsmama, the hardest part of having a child who is not cisgender has been *other people*. When her child, M, started using “they” pronouns at the age of 6, Sandy and her husband agreed to use them too — and it all “worked well enough.” But, M’s teachers and peers at school wouldn’t always follow suit, and family members, especially M’s grandmothers, still “expend remarkable amounts of mental energy to communicate that they don’t believe that M knows who they are,” Sandy writes. ⁣
⁣
M knows who they are though. “I just feel like a human being. Like a person. That’s all,” they told their parents. Or, as their T-shirt in this photo says, they’re “too cute to be binary.”
⁣
In her essay, Sandy speaks to experts about how parents of gender-nonconforming children can best support their kids — and shares how her family stays true to M’s identity. ",,,,,,,
https://www.instagram.com/p/CA-zA3xh3HZ/,6/3/2020,Sidecar,4151,87,"The conversation about race needs to start early and keep happening. For parents who may not know when or how to have these talks, swipe 👈🏼 to read our thread of expert advice, and check out our story for reading recommendations for every age ",,,,,,,
https://www.instagram.com/p/CA8EPVJBI62/,6/2/2020,Sidecar,2309,7,"In the week since the killing of George Floyd, American cities have been theaters of dissent. The Times asked protesters from all walks of life what inspired them to take to the streets, where they face potential violence and the ever-present threat of the pandemic. Sydney Driver, who protested in Brooklyn, told @nytcaitlin he and his wife cried together watching the video of Mr. Floyd’s fatal encounter with the police. “If I have to die out here,” he said, he didn’t care. “I don’t. I just don’t.” ",,,,,,,
https://www.instagram.com/p/CA6KIJ1jhj0/,6/1/2020,Video,2362,48,"A Conversation About Growing Up Black. “We live in a world where my mom has to be afraid when I walk outside from the people who are meant to protect me,” says 17-year-old Malik in this 2015 Op-Doc by @nytopinion. Joe Brewster and @perrip08 asked young black men and boys to speak candidly about the daily challenges they face; their answers include memories of strangers crossing the street to avoid them, being arbitrarily stopped by the police and knowing their parents fear for their lives every day.⁣",,,,,,,
https://www.instagram.com/p/CA5inS1hwe5/,6/1/2020,Sidecar,6964,48,"You may be struggling to find the words to talk to your children about the events of the past week, which have recentered complicated questions about race, policing and violence. That was the subject a group of journalists from The Times came together to discuss back in 2016, after the shootings of Philando Castile and Alton Sterling, and it sadly remains a topic for us today. How do we talk to our kids about the killing of George Floyd and the protests that are taking place around the country? If you’re looking for guidance, the whole transcript is worth a read, but we especially liked this advice from Dana Canedy, a former senior editor, and Sandra Stevenson, a visuals editor. What questions are coming up for you and your family? Have you started talking about racism and the news? Share your comments below or DM us if you have a story you’d like to share. Link in bio to read more.",,,,,,,
https://www.instagram.com/p/CA01tdZB_nF/,5/30/2020,Image,3524,38,"noideadaddyblog is rethinking some of his family’s pre-quarantine ways. He explains: “Listen, I don’t want to downplay how much this pandemic has hurt the world. I’ve never felt so much uncertainty in my whole life. People are losing family members and friends, along with their livelihoods.” But without soccer doubleheaders, gymnastics practices and errands to run every weekend, he’s found more time to connect with his wife and kids. And he’s realized that time together may be exactly what they all needed. His full essay is at the link in bio.",,,,,,,
https://www.instagram.com/p/CA0JPmLhR3h/,5/30/2020,Sidecar,2218,16,"All month we’ve been featuring single moms by choice, photographed by @jackiemolloy13. This is Alexa, a 36-year-old psychologist, who was emotionally and financially ready to conceive. But, she went through five failed IUIs, a round of IVF, a miscarriage, a frozen embryo transfer and about $36,000 paid out of pocket, before she finally had her baby girl.⁣ ⁣Lucca was born in 2018, and the two live in a one-bedroom apartment near Alexa’s parents in Manhattan. With New York under shelter-in-place orders, she’s been especially grateful for her mother’s help. “Being a single parent now is very difficult and unrelenting,” she said.⁣ One of Alexa’s biggest fears is who will watch Lucca if anything happens to her. “I think it’s just the vulnerability of the pandemic and god forbid something happens to me. It’s just showing me the vulnerability of life and what would happen if I wasn’t here.”⁣ Tap the link in bio to see all of Jackie’s portraits of single moms by choice and read about their journeys.",,,,,,,
https://www.instagram.com/p/CAyVtrDlNMj/,5/29/2020,Image,6459,38,"Today we published a beautiful and searing essay from @sheisimanib, a writer who has chosen to live abroad with her family because she wants to keep her black son safe from violence. She writes:⁣
“We didn’t have those clichéd conversations about the house and white picket fence we hoped to have... For my husband and me, the conversation was: Where could we safely raise a family? Where could we feel like we didn’t have a constant threat or target on our backs?”⁣",,,,,,,
https://www.instagram.com/p/CAxPLfojNGj/,5/29/2020,Image,1300,36,Can you even imagine? What were your #tinyvictories this week?,,,,,,,
https://www.instagram.com/p/CAwIgGiFM3n/,5/28/2020,Image,1900,34,"Absence of flow, that heavenly state of total absorption in a project. Living in a household that resembles the 1960s, but carrying the work and parenting expectations of 2020. A very good chance that both of the above are related.Jennifer Senior, who wrote the parenting book “All Joy and No Fun,” says these are the factors that make quarantine parenting, for those who are lucky enough to work from home, so maddening. And, in her column for @nytopinion she reminds us to give ourselves and each other a bit of grace. ",,,,,,,
https://www.instagram.com/p/CAu538eBENn/,5/28/2020,Sidecar,1226,19,"Pregnancy and the postpartum period are already vulnerable times. During the coronavirus pandemic, @womensmentalhealthdoc, a psychiatrist who specializes in taking care of pregnant and postpartum women, says she is seeing an increase in perinatal mood disorders, including intrusive worry, obsessions, compulsions, feelings of hopelessness and insomnia in her patients. And she’s not alone in her observations: Worldwide, mental health professionals are concerned. Dr. Lakshmin writes:⁣ “I’m urging women not to wait to seek help. It can be tempting to dismiss your symptoms as just stress. But, perinatal depression or anxiety that may be caused by Covid-19 is still perinatal depression or anxiety. It responds to treatment.” Link in bio for her full piece on what to look out for. **If you’re experiencing symptoms, you can call Postpartum Support International’s help line at 1-800-944-4773 or visit their provider directory.",,,,,,,
https://www.instagram.com/p/CAtZpCMlFYL/,5/27/2020,Image,1349,33,"Even as the coronavirus has wrecked so many lives, writer Michael Wilson has found “a bright side to a dark chapter”: Quarantine is bringing many families closer together. ⁣“I think I needed to break away from my habits of life, learn new stuff and spend time with family,” Brian Lindsay, 38, told Michael, while he was at a park in the Bronx with his wife, 3-year-old daughter and baby cousin. At first he needed to write himself a note as a reminder to take those breaks, but now it feels natural. “I am happier that this happened,” Brian said.⁣ Have you experienced moments like this, when things feel almost normal? Has your family found other silver linings to the pandemic? Share them in the comments. We all could use some joy.",,,,,,,
https://www.instagram.com/p/CAsStrNh4-l/,5/27/2020,Image,1763,47,"Before the pandemic, a couple probably didn’t need to discuss whether their kid could use a public restroom before going out. But now, decisions small and large require negotiation. “To me, obviously that’s off the table,” Lian Chikako Chang, 39, said about the restrooms. “But my husband is less interested than I am in having our son poop in a Ziploc bag.” The pandemic has introduced a whole new world of things for couples (and ex-couples) to fight about. In this week's newsletter, @jessgrosewrites talks to parents about the types of disagreements they’re having — and got advice from @profemilyoster, @alexandrasacksmd and more experts about how to have productive conversations instead.",,,,,,,
https://www.instagram.com/p/CAq7R0SBvUx/,5/26/2020,Sidecar,2614,16,"Sniff. @nothingbutbonfires reached out to the people who miss our kids, including teachers, caregivers and even a clown. ⁣“Put your clothes on backward, your underwear on the outside and an adult’s big old tennis shoes on your feet,” said Boswick the clown, who has performed at more than 10,000 children’s events over the past 30 years. These days, he misses the in-person energy of a live audience, but said children can conjure their own magic by staging a circus at home. “You don’t need special clown makeup, just a circle of red lipstick on your nose and cheeks.” Once you’ve assembled an audience of stuffed animals, it’s on with the show. ⁣",,,,,,,
https://www.instagram.com/p/CAqPXmmBWDH/,5/26/2020,Sidecar,2046,61,"As the pandemic stretches on, grandparents are split into two groups: those who are quarantined from their families and those who are isolating beside them. Reva Fishner, who recovered from coronavirus in March, is in the latter camp. Her son and his wife called for reinforcements after juggling full-time jobs and parenting for six long weeks. Now, Reva, 66, cares for her 3-year-old twin grandkids every day. She used to see them a few afternoons a week, and loves having extra time with them, but says it’s been “incredibly challenging.” ⁣",,,,,,,
https://www.instagram.com/p/CAnTzIel5BI/,5/25/2020,Image,384,6,"It’s the (unofficial) first day of summer, and while our options for fun in the sun are limited, there are many amazing activities that can be done at or near your home. In this photo, a reader’s two daughters listen to their omi (grandma) tell them stories about her childhood over speakerphone while tracing their heritage on a map. A lesson in history and geography, plus quality time with loved ones? A+ ⁣We want to hear about the creative and safe ways you and your family are having fun this summer that don’t involve a lot of travel or money. Are you camping in your backyard? Building a makeshift water park out of sprinklers? Tap the link in bio to share with us, and we might feature you in an upcoming piece.",,,,,,,
https://www.instagram.com/p/CAkzgZblHNl/,5/24/2020,Image,2468,24,"The demands of nonstop caregiving during the pandemic may make it a bit harder to keep your cool when things go wrong, which is why we wanted to reshare this particularly relevant essay from Brianna Sharpe. When Brianna — who had a rambunctious preschooler and a newborn at the time she wrote this essay — found herself feeling overwhelmed by her emotions, her first instinct was to blame herself. But upon discovering mindfulness practices that worked for her, she’s been able to take a more self-compassionate stance. “It was not my kids I needed to ‘handle,’ it was my own reactions,” she wrote. “And that does not mean my son runs the show while I meditate in a corner. Instead, I allow myself the same compassion I grant to him.”",,,,,,,
https://www.instagram.com/p/CAiqK5JBuQT/,5/23/2020,Sidecar,551,7,"In this unnatural state of isolation, the Times asked its photographers to turn their lenses inward and show us what life looks like now. @idrissolomon and his wife, who live in New York City with their 5-year-old son, Talib, have been given an opportunity to start homeschooling — something they’ve wanted to do since before the pandemic. So far, it’s been a success. “He is happier now than he was in school,” Idris writes. “We watch a lot of movies. I teach him how to cook and play chess. We wrestle and kick the soccer ball around.” Tap the link in bio for more beautiful photos and to read the rest of the stories.",,,,,,,
https://www.instagram.com/p/CAiMAz0BOEo/,5/22/2020,Sidecar,1689,43,"Are play dates safe again? Can you bring back your babysitter? As your state reopens, you may have questions about what activities are safe for your kids. ",,,,,,,
https://www.instagram.com/p/CAgH9MgBPM6/,5/22/2020,Sidecar,1405,29,"After a marriage, a child and a divorce, Trelawney McCoy, 55, from Rochester, N.Y., decided she wanted to open her home to more children — on her own. She adopted eight from the foster care system and has cared for more than 20 others who have come to live with her.⁣ As part of her project following single moms by choice, @jackiemolloy13 documented Trelawney’s day-to-day life, which, on top of caring for her family, includes working with teen moms to get them essential supplies and transporting them to doctor appointments and job interviews. She also runs a local association dedicated to keeping inner-city youth participating in sports and off the streets. “If you had told me years ago that I would be where I am now, I would have told you you’re crazy,” Trelawney told Jackie. Still, she dreams of a bigger house with more children. “I just want to look out for the kids, give them something to do, opportunities and a chance for a happy future.”",,,,,,,
https://www.instagram.com/p/CAfXJGxA9Kl/,5/22/2020,Image,3016,60,Our 4 year old has decided to potty train her 2 year old brother. She makes him sit on the potty and she reads books to him. So sweet! Share your #tinyvictories below.,,,,,,,
https://www.instagram.com/p/CAdJOkTlBCz/,5/21/2020,Image,1236,70,"With many schools, daycares and camps closed, keeping our kids active has become more and more of a challenge, and many of us have had no choice but to get creative. For example, Rachel Camhi — a teacher who lives in a three-bedroom apartment with her husband and two children in New York City — bought a 10-foot-by-7-foot bounce house and squeezed it inside her living room to keep her 4-year-old and 18-month-old occupied. As you can see, it was a big hit! ⁣⁣
⁣⁣Unfortunately, bounce houses are sold out just about everywhere, but we know there are tons of other ways to keep kids moving throughout the day. We’d love to hear the creative ways that you’ve entertained them. We’d also love to *see* those ideas, if you have photos. To share with us, head over to the link in bio and fill out the form. That, and as always, our DMs are open. ",,,,,,,
https://www.instagram.com/p/CAberSmnF15/,5/20/2020,Image,1128,91,"“Magic” — “game changer” — these are words frequently used by parents describing how melatonin helps their children fall asleep. “It’s so widely used, it is astonishing to me,” said Dr. Judith Owens, of Boston Children’s Hospital. But is the popular (and, btw, completely unregulated) sleep aid safe, or even effective? @caron_nyt got answers from experts about when melatonin can be helpful for kids and how to use it safely. Tap the link in bio to read, and remember to talk to your pediatrician before starting your child on any sleep aid.",,,,,,,
https://www.instagram.com/p/CAaeQh-Bi5D/,5/20/2020,Image,550,7,"Do you find that you’re comparing yourself to other parents on social media more since we’ve been in lockdown? @jessgrosewrites has, and isn’t feeling great about it. “I’m particularly disgusted with myself for the pettiness,” she writes, “considering how much death, fear and disruption I read about and report on every day.”⁣ For this week’s newsletter, she spoke to experts about why it’s so tempting to mom-shame oneself, especially in the most fraught of circumstances. Tap the link in bio to read and subscribe to our newsletter.",,,,,,,
https://www.instagram.com/p/CAYgasGjPR0/,5/19/2020,Image,3315,40,"Matthew Fray is a Cleveland-based blogger who coaches men on how to avoid divorce. His qualifications? In 2016, Matthew wrote an agonized blog post about his failed marriage, which swiftly went viral. He repeatedly emphasizes that he is not a psychotherapist (“I don’t have a Ph.D. or anything”) and that his services do not supplant counseling, but has heard “thousands of times” that his piece saved someone’s marriage. ⁣
@janceedunn, the author of “How Not to Hate Your Husband After Kids,” was intrigued by Matthew’s unconventional approach. She’d researched invisible labor for her book, and couples counseling had ironed out most of the larger issues in her own marriage. Nevertheless, Jancee asked her husband to try out a session, with hope that Matthew could help her husband kick the habit of “putting things down rather than away.” Not only was the session effective, but Jancee discovered some of Matthew’s marriage-saving tricks along the way.",,,,,,,
https://www.instagram.com/p/CAWOqP9oDNR/,5/18/2020,Image,2444,72,"Is your child completely over Zoom? The good news is they’re not alone. @kellyhgreenway spoke to experts about why kids might be resistant, and how to improve their experience. “It’s easy for parents to forget that kids aren’t yet experts at small talk,” says @drcourtneybolton, a child and family psychologist. So video-chatting, which relies on a certain amount of chit-chat, may be especially awkward for them. ⁣Two major tips: Discuss potential questions to ask their friends ahead of time with your child, ideally centered on common interests. ⚠️Give your kids a “code word” so that they can call for help if they’re feeling uncomfortable or just need help finding the mute button.",,,,,,,
https://www.instagram.com/p/CAVE5M9j93c/,5/18/2020,Image,2101,83,"Desperate times call for desperate measures. Every workday, Rachel Kanarek Boudoin, a commercial real estate attorney in Atlanta, gets dressed, makes breakfast for her daughters (4 and 2) and kisses them goodbye before heading out to a makeshift office in the garage. The girls think she’s still commuting to her office! There are some very complicated acrobatics in place for her to use the bathroom. When the 4-year-old asked why Mommy’s car is still at the house, Rachel’s husband said she’s using Uber. Bravo, Rachel. We’re impressed. Rachel isn’t the only one getting creative during lockdown. Parents are hiding in their cars, showers and crawl spaces, all in the name of productivity. What’s your go-to hiding spot? ",,,,,,,
https://www.instagram.com/p/CAS0lDTBkT0/,5/17/2020,Sidecar,4601,38,"Seth and Meg Mosier had dreamed of starting a family, but when their chance finally came, coronavirus almost took it away. After years of difficult fertility treatments and then adoption challenges, they were set to adopt their daughter, 2-year-old Selvi, in India. Then, just 20 hours after the couple arrived, the country sealed its borders.⁣
@abihabib, a South Asia correspondent for the Times, met the Mosiers while she was being evacuated from Delhi and they were stranded with their new daughter in a near-empty hotel. “So many people told us we were the bright spot in their day,” Meg said of that time. “The staff were all sleeping at the hotel, scared — and hated being separated from their families. Selvi drew so much light to them.” ⁣",,,,,,,
https://www.instagram.com/p/CAQPjyKhigM/,5/16/2020,Sidecar,1083,10,"For @hillarysavoie’s 9-year-old daughter Esmé, life is “essentially a prolonged, inhabited emergency.” Esmé is medically fragile, developmentally delayed and immune-compromised, with a host of other symptoms and conditions that leave her extremely vulnerable — even when there isn’t a pandemic raging outside. In a beautiful essay, Hillary explores how life perpetually on the brink of crisis has not only affected her motherhood, but transformed her as a person. She writes, “I’m worried that I no longer know how to love other than with this soft fierceness that comes from being haunted by our vulnerability — the fragility of Esmé’s life and of mine, reshaped to wrap around hers.” ",,,,,,,
https://www.instagram.com/p/CAOhBOFBxaH/,5/15/2020,Sidecar,8574,129,"Erica Moffett always yearned for closure in her own adoption story. She knew she was born in Seoul, South Korea, her Korean name was Sohn Soon and she was abandoned on the steps of a police station as a baby. For most of her life, Erica also thought about adopting to start her own family — and even though she knew it would be a challenge to do so as a single woman in her 40s, she started the process in 2015.⁣As part of her project following single moms by choice, @jackiemolloy13 captured Erica’s journey — from making brochures, a website, postcards about herself and even paying for Google ads to finally adopting her daughter Chloe Ann two years later.⁣Erica knows one day she'll need to explain her daughter’s adoptive story to her, and hopes her personal experience will make it easier to have that conversation. Tap on the link in bio to read the rest of her story and see more of Jackie’s project.",,,,,,,
https://www.instagram.com/p/CANVYE5DFAn/,5/15/2020,Image,3051,74,I taped an old shoelace across my door frame and draped random scarves on it. My 18 month old just ran in and out of the 'scarf curtain' for 15 minutes! I sat by myself in the next room. It was great. By! Herself! Share your #tinyvictories below,,,,,,,
https://www.instagram.com/p/CAL7mWro3YI/,5/14/2020,Image,1005,10,"It took a pandemic for @shoshannah7, an actor and co-creator of “This Close” (the first show written by and starring deaf people), to finally see people communicating with their eyes, as she always has. Sheltering in place with her husband and young daughter who can hear, Shoshannah has found an expressive upside to the hush that has fallen over the land. “Now, in this pause that has blanketed the world, my daughter tells me that she can hear the birds,” she writes for Modern Love. “And rooted as I am, I can feel the sigh of relief this has given to the world and to us.”",,,,,,,
https://www.instagram.com/p/CALILCXB0aW/,5/14/2020,Sidecar,670,19,"As states across the U.S. slowly begin to reopen, the fate of county fairs remains uncertain. In rural communities, summer without a fair is a heartbreaker for many children, but *especially* those kids in 4-H clubs, youth organizations run by the USDA, who have been tending their animals for months to prepare for livestock shows. To curb some of this disappointment, and bring us all a little joy, local farm clubs are asking kids to submit photos and videos of their cows, sheep, pigs and goats for online events. Here’s Lilly Mae Bryan, 5, from North Carolina showing off her goat, Ariel, for the judges. Emma Helsinger, 9, from Ohio, also participated in an online show, but said she was sad she didn’t get her pigs, Luke and Leia, in the ring after training them for months. We think they would have won big, Emma. Tap the link in bio for more delightful images and the full story.",,,,,,,
https://www.instagram.com/p/CAIXb5-j1en/,5/13/2020,Image,1084,26,"Have the words “remote learning” started causing you existential angst, too? In this week’s newsletter, @jessgrosewrites — whose children are among the millions in N.Y.C. who don’t know when they’ll be able to return to a physical school — spoke to a teacher, a learning specialist and a head of school about how we can get through the rest of this year (at least) without completely burning out. One big thing to remember: teachers are in the trenches with us, and many of them are ready and willing to help. ",,,,,,,
https://www.instagram.com/p/CAGyoAuBNG_/,5/12/2020,Sidecar,2506,23,"In this unnatural state of isolation, the Times asked its photographers to turn their lenses inward and show us what life looks like now. @joshhaner, a Pulitzer-winning photographer, is home in San Francisco with his wife and young daughter. “I doubt our 15-month-old daughter notices much difference in her daily life except that her dad is around more,” Josh writes. “We no longer play on the swings at the park or take long bike rides. But we still say hi to the birds from our porch and check on our newly planted vegetable seeds in the backyard.” Tap the link in bio for more beautiful photos and to read the rest of the stories. ",,,,,,,
https://www.instagram.com/p/CAGVLgIAShS/,5/12/2020,Image,515,6,"The wails. The screeching. One more conference call interrupted. If your kids are fighting more during lockdown, you’re far from alone. While the “quarantine quarrels” may be testing your patience, they also might be an opportunity to teach conflict resolution, says @seasquared, our reporter. “Wait, don’t roll your eyes just yet,” she’s quick to add. “Maybe quarantine could provide the perfect environment for bickering siblings to build better relationships.” It can be tempting to intervene, but experts say that can stop them from brainstorming ways to fix their problems on their own. That doesn’t mean it’s pleasant or convenient when the fighting is happening directly in your ear, though. The good news is there are ways to reduce the fighting without getting involved in your kids’ squabbles, like praising them when they *are* getting along.",,,,,,,
https://www.instagram.com/p/CAEMBW4osEI/,5/11/2020,Image,621,59,"Companies are now offering screen-based child care. Of course, virtual babysitters can’t change diapers, chase a toddler or tuck anyone into bed. But they can entertain kids and give us short breaks. So, would you try it? Let us know in the comments below, and tap the link in bio to find out more. ",,,,,,,
https://www.instagram.com/p/CADRKZ9BnLh/,5/11/2020,Sidecar,1555,33,"Womp. Who’s spending more time home-schooling your kids or helping them with distance learning? In a new poll, mothers and fathers did not agree on the answer to that question. Among parents with kids under 12, 45% of men believe they are carrying the weight, but only 3% of women agree — and 80% of moms say they spend more time on it. So, who’s right? Researchers and couples had previously assumed women were bearing the brunt of the extra labor during the pandemic, but this survey is among the first efforts to quantify it at a national level. ",,,,,,,
https://www.instagram.com/p/CAAV0frn8pY/,5/10/2020,Image,2367,76,"We don’t have to tell you all the ways Mother’s Day looks different this year. But, even amid this horrific pandemic, one thing we can hold onto is the community motherhood gives us. That’s why we’re sharing this line from @natashiadeon’s piece about learning to accept help more readily as a mom. Natasha writes:⁣
⁣
“In our blood are hundreds of mothers who came before us and we stand ahead of hundreds more, because we will survive this challenging time and our children will inherit our choices. Asking for help is not a sign of weakness. It takes a special kind of bravery that can only come from humility and surrender.” ⁣Consider her words a little reminder to lean on — and celebrate — each other. Tag those who have helped you in the comments, tell us how you’re spending the day or let us know if you could use a little extra love. Happy Mother’s Day, friends.",,,,,,,
https://www.instagram.com/p/B_-NOQ9BD9O/,5/9/2020,Image,5144,96,"It’s Saturday and it’s #mothersday weekend. So here’s a gift from @womensmentalhealthdoc. If you find you are sacrificing more of yourself to make life easier for your family, especially during the pandemic, wrap her piece around you like a warm blanket. Dr. Lakshmin explains the deep, painful psychology that can cause us to diminish ourselves in service of those around us, and speaks to other experts for tips on how to quit martyrdom. ",,,,,,,
https://www.instagram.com/p/B_8U1ZyBkgb/,5/8/2020,Sidecar,8798,216,"After a string of bad dates, Sarah McKnight, a pilot who had once imagined meeting someone and getting married before having a baby, decided she didn’t want to wait any longer. ⠀
⠀
“You don’t need a partner, who needs them. We can do this on our own,” she told @jackiemolloy13, a visual journalist who spent two years capturing Sarah’s journey to single motherhood by choice. Jackie was with her through fertility treatments, including six intrauterine inseminations, an in-vitro fertilization, a failed frozen embryo transfer and miscarriages; she was there in the delivery room and the early days of Sarah caring for her daughter. These photos are part of Jackie’s project following single moms by choice. ",,,,,,,
https://www.instagram.com/p/B_7fr1ujHdG/,5/8/2020,Image,2134,42,My 2 year old wanted to play hide mommy with stuffed animals. I got to lie down for 20 minutes. Twenty. Whole. Minutes. What were your #tinyvictories this week?,,,,,,,
https://www.instagram.com/p/B_5BK2jl6MB/,5/7/2020,Image,2436,84,"When a person gets pregnant, changes sweep through their body. But what happens to their brain? Honestly ... nobody really knows. Researchers across the world have only begun to chip away at this perennial question, and the results they’ve gathered so far are affirming: The brain, it seems, may change more quickly and more drastically during pregnancy and the postpartum period than at any other point in life — including puberty. @jennigritters spoke to the scientists who know most about so-called “mommy brain” about what we know so far, and @armandoveve illustrated those changes. We particularly appreciate the volcano",,,,,,,
https://www.instagram.com/p/B_3gj6FBnbQ/,5/6/2020,Sidecar,1313,39,"“I have a 5-year-old. I had a balloon,” said Rachel Yoder, a novelist in Iowa, about the impetus for making this coronavirus piñata. Little did she know she was part of a mini-trend. When Milo Field turned 10 under lockdown he said he wanted “a coronavirus piñata to smash to bits.” His dad, the British ambassador to Bosnia and Herzegovina, obliged. It should be said that this kind of destructive creativity can help kids (and adults, tbh) cope with uncertainty. When Monica Wideman's children finished hitting their ""coroñata"" she asked them, “Do you feel better now? And the answer was ""Yes."" Link in bio for more excellent piñata pics.",,,,,,,
https://www.instagram.com/p/B_2TCgoh2-z/,5/6/2020,Sidecar,1833,43,"Today, in honor of Mother’s Day, we are kicking off a conversation about the whole messy, glorious, complicated story of identity and motherhood. We have short essays from @colabird76, @amberrosetamblyn, @cupofjo, @caseyrosewilson, @angelagarbes, @robintunney and several others on how motherhood changed their lives. There are helpful pieces on how becoming a mom rewires your brain and how not to lose yourself when you have children, gorgeous portraits of women who chose to become single parents, and so much more.",,,,,,,
https://www.instagram.com/p/B_0TC06JjGG/,5/5/2020,Image,798,17,"Dr. Joi Bradshaw-Terrell is concerned for the fate of pregnant people in Chicago’s South Side neighborhood. St. Bernard Hospital, where she provides obstetric care to the majority-black population in the South Side’s Englewood neighborhood, announced they would stop delivering babies to respond more effectively to Covid-19.⁣ ⁣ “It’s heartbreaking,” said Shamya Bland, a mother of two who has given birth to both her children at the hospital. “It’s in the heart of the hood. Most black people in the neighborhood were going to go there.”⁣  This closure came on the heels of two nearby hospitals also shuttering their maternity wards. Experts fear this trend will pick up steam nationwide post-coronavirus, devastating an already vulnerable population. Research has shown that black patients receive better care and communication when they see black doctors.",,,,,,,
https://www.instagram.com/p/B_yFPIjhOmB/,5/4/2020,Sidecar,2942,117,"Turn your child into a productive co-worker. Like most preschoolers, Michaeleen Doucleff’s 4-year-old has a slew of daily demands. But Michaeleen, a science reporter for @npr, realized she could learn from her own research into cultures that raise remarkably cooperative and generous children. In these cultures, she says, you find a striking commonality: Mothers and fathers don't feel the need to constantly entertain and play with their kids. Parents allow children to participate in adult work — an opportunity that many American kids don’t have today. So, Michaeleen has stopped being her kid’s “event manager.” Instead, she’s training her daughter to be her co-worker. What do you think? Could you do this in your home? ",,,,,,,
https://www.instagram.com/p/B_xVz_dF3zj/,5/4/2020,Image,585,3,"At 6 a.m. alone in her room at a homeless shelter for expectant and new mothers, Camila — the 22-year-old subject of @sugarpuss74’s new book “This Is All I Got: A New Mother’s Search For Home” — went into labor. Camila labored alone in her single room at the shelter, then had an emergency c-section with no company other than her doula. Her challenges only continued from there. As Sandler writes in the book, “Camila spent her fourth trimester nursing her baby in the purgatory of government offices, seeking public assistance and subsidized housing, trying to stay in school — on a quest f",,,,,,,
https://www.instagram.com/p/B_uwvCOHGyG/,5/3/2020,Image,788,24,"What rights do pregnant workers have in a pandemic? Anna, 29, is an administrative assistant in her 21st week of pregnancy, and despite a recommendation from her doctor to work from home, she isn’t allowed to. Her employers gave her a choice: be laid off for a few weeks and collect unemployment, or come into the office. Anna (who asked that we use her middle name, and not specify her location, because she fears reprisal from her employers) chose the layoff, but that only lasted until her office got a loan, at which point, they called her back, and she grudgingly returned. Now, as some states begin to reopen businesses, more and more pregnant workers may be faced with similar, difficult scenarios. @jessgrosewrites spoke to legal experts about what their rights to leave and other accommodations are. ",,,,,,,
https://www.instagram.com/p/B_sSX-_BXAC/,5/2/2020,Image,939,20,"From the list of @nytcooking’s easy recipes to make with your kids, we present this beautiful mac n’ cheese, courtesy of @juliamoskin. What makes this one especially simple? No roux required, and you don’t need to pre-cook the noodles ahead of time. Just mix the ingredients together, pop it in the oven, check on it halfway through, and in an hour you’ll have the perfect comfort food. Still, the question remains: will your kids eat homemade mac or only the boxed kind?",,,,,,,
https://www.instagram.com/p/B_ph34CFxcM/,5/1/2020,Image,625,21,"Made musical instruments out of Tupperware , rice, bottle caps, and rubber bands. My 9 months old enjoys these for a few minutes per day. Sometimes my coffee is still hot. Hot coffee, what a luxury! Share your #tinyvictories below!",,,,,,,
https://www.instagram.com/p/B_n9WEEhxQz/,4/30/2020,Image,5245,166,"Last year, @momlists wrote a brave essay for us about ""mother rage."" Since then, she says she has received countless messages from women around the world who relate. Minna told us: ⁣“It's very affirming, but it's also upsetting. Mothers are raging everywhere. Right now, during week 7 of shelter in place, with mothers picking up the bulk of the child care, the cooking, the cleaning ... behind the rainbows and teddy bears in the front windows, fury is festering.” ⁣With this in mind, we wanted to share her piece again. If you're losing patience more than you'd like to, you're not alone — and it's worth talking about. Link in bio to read. Comments and DMs are open to share and support.",,,,,,,
https://www.instagram.com/p/B_lS4KwIbuf/,4/29/2020,Image,2272,119,"Dissuaded from going to clinics, but armed with blood pressure cuffs, fetal heart rate Doppler monitors and screens, many pregnant people are being taught to self-monitor. Most of their previously required in-person appointments are canceled. As @emgollie notes, collecting information about your own vitals and symptoms can be “oddly empowering” during this uncertain time. Putting more control in the hands of pregnant people and using telemedicine may call into question whether all those prenatal care visits were truly necessary at all. Tap the link in bio to read about what this could all look like, even after the pandemic ends.",,,,,,,
https://www.instagram.com/p/B_kRp-OBYwp/,4/29/2020,Sidecar,1575,40,"Yes, she is well aware that this is a nonproblem right now, but @jessgrosewrites says not being the “fun” parent still irks. In this week’s newsletter, she spoke to experts about why these fun/not-fun fault lines develop between parents, how to talk to a partner about them and be kinder to yourself, too.⁣ Which type of parent are you? Link in bio to read the full newsletter and subscribe. ",,,,,,,
https://www.instagram.com/p/B_iZnYJFDdn/,4/28/2020,Video,1873,123,"profemilyoster is certainly not the first parent to wonder whether having siblings is better or worse for kids. Her children have been happily playing together during lockdown, when they are not whacking each other with sticks. So the economist and author of “Cribsheet” and “Expecting Better” looked into the data. She found, as other experts have before, that having siblings or not doesn't predict success. What does matter, though, is birth order. First borns — regardless of whether they have siblings or not — have an edge. ",,,,,,,
https://www.instagram.com/p/B_f-BRaDEAR/,4/27/2020,Image,807,29,"hese no-bake peanut butter and chocolate cookies save you the hassle of turning on your oven, and they take just 15 minutes. It's a recipe @margaux_laskey, a senior staff editor for @nytcooking, says is perfect for making with your kids; she recommends using quick-cooking oats, not instant, for a ""delightful texture and chewiness."" Link in bio for the recipe. Let us know if you try it — or if you've found other easy dishes and treats to make with the kids at home.",,,,,,,
https://www.instagram.com/p/B_dp4BXpjB3/,4/26/2020,Image,1598,47,"How’s everyone doing? Things are starting to break down in @fmanjoo’s house, the columnist writes for @nytopinion. Not just social bonds and sense of self. Household appliances and bodies, too. Then, the kids presented them with this, a written declaration of war, including demands for control of bedtime, how long walks are and how much TV can be watched. “I am really starting to wonder how anyone could think this is sustainable,” Farhad writes. “This is not just about my personal annoyance and incapacity. Much of the future depends on parents coping.” ⠀",,,,,,,
https://www.instagram.com/p/B_cstIXg8Rl/,4/26/2020,Image,1753,54,"Jonna Rubin, a writer and stay-at-home mom in Framingham, Mass., was shocked when her daughter FaceTimed into a play date where five or six children were gathered, despite the stay-at-home advisory issued by the state. “My frustration turned to rage when I remembered that the mother is an E.R. nurse,” she said. “So she’s going to a hospital, coming home and hosting other children for play dates, and then sending those children back to their homes.”⁣
⁣
Before the pandemic, disagreeing with another parent’s choices usually wasn't a big deal. Now, when those choices may violate public health guidelines, the situation becomes significantly more uncomfortable. @nothingbutbonfires spoke to psychologists about why some people might be resistant to social distancing, and how to deal with your child who might feel jealous or confused when they see other children together. ",,,,,,,
https://www.instagram.com/p/B_a02rbBq-I/,4/25/2020,Image,477,19,"Looking for a new podcast to entertain your kids this weekend? You might want to give ""Ear Snacks"" a try. Led by musicians @andrewandpolly — who’ve created songs for Sesame Studios among others — “Ear Snacks” leads with a catchy soundtrack and features the voices of children weighing in on a range of subjects, like Ruth Bader Ginsburg and the United States census. Tap the link in bio to give it a listen and get more podcast recommendations for stir-crazy kids from @emmdib.",,,,,,,
https://www.instagram.com/p/B_X_df8B14-/,4/24/2020,Image,2206,88,"In this prolonged period of Time Together™, the best parts of our relationships — and the not-so-great parts — are magnified. @primattoo has realized her constant nitpicking of her spouse probably isn't ideal, even if it's her default behavior. ""This should be easy,"" she writes, ""and it is, for so many. But in traveling from my heart to my tongue, my feelings drift, mutating into grotesque, prickly shapes. I walk into the kitchen, where my husband has sauteed shrimp and greens for dinner. It looks delicious! What I mean to say is 'Thanks for making dinner, it smells wonderful!' What I actually say, watching him season the chard, is 'Ugh, you and the fish sauce!'” Have you found yourself criticizing your partner more now that you're always together?",,,,,,,
https://www.instagram.com/p/B_XaUA6g9Xy/,4/24/2020,Image,774,31,"Our 1 year old has recently started to whine during diaper changes, so I taped pictures of cats on the underside of the shelf above his changing table. Worked like a charm he giggles and laughs the entire time. Share your #tinyvictories below.

#parenting #momlife #dadlife #babies",,,,,,,
https://www.instagram.com/p/B_Uszb9AQ25/,4/23/2020,Image,968,15,"Ramadan begins today and Asiya Shakir, a pediatric gastroenterologist from Atlanta, has written a sweet essay about why she is letting her 7-year-old daughter fast. Asiya was already grieving the loss of a communal Ramadan. Attempts to get her kids excited for the holiday had flopped. Then, her little girl told her she wanted to fast to “know what it feels like to not have food like the people who don’t have food and are hungry!” Asiya was initially reluctant (fasting is not required for kids and any threat to her child’s health was a non-starter), but with a little planning and creativity, she found a way to foster her daughter's nascent spirituality safely. Tap the link in bio to read more — and Ramadan Mubarak to those celebrating!",,,,,,,
https://www.instagram.com/p/B_S_wBRBSRe/,4/22/2020,Sidecar,1801,50,"Your yound child isn't saying they are stressed out about covid and social distancing, but you still feel like something's up. Here are some silent signs they might be having a hard time. Knowing the more subtle ways stress can manifest in your young child may help you be more attentive to their needs.",,,,,,,
https://www.instagram.com/p/B_SaiYYBAhm/,4/22/2020,Sidecar,850,12,"One night recently, @eflakeagogo’s 7-year-old daughter burst into tears at bedtime. “What is all this even for?” she wailed. “All of this, why are we even here? Why are we even alive?” The mini-existential meltdown echoed feelings that Emily, who is a cartoonist for @newyorkermag, has been having about her own identity, in this moment. “The part of me that used to think and feel and react in ways I could shape into a cogent essay, a humor piece or a gag has been replaced by a small, panicked bird that lives in my chest cavity,” she wrote for today’s newsletter. ⁣That night, Emily tried to soothe her daughter, who was having none of it. So, she did what so many of us do when our kids need help. “I held her, and rocked her, and hoped my silence helped.” Are your children asking tough questions more during coronavirus? ",,,,,,,
https://www.instagram.com/p/B_Qa2juDdLO/,4/21/2020,Image,398,13,"“Tangled"" may feel a bit too real right now to qualify as escapism: When we meet Rapunzel, she's trapped in her tower and hasn’t gone outdoors in 18 years 😰. Despite the parallels to our current plight, Nancy Coleman, a culture reporter for the Times, finds herself returning to this film. ""It’s part classic, heartwarming princess tale, part princess fighting her way through the kingdom with nothing but a frying pan, some magic hair and a partner in crime who stumbled on her abode by mistake,"" she says. Is ""Tangled"" on rotation in your household? Tap the link in bio to read about why it's become of one Nancy's top comfort films and let us know what your family's are in the comments.",,,,,,,
https://www.instagram.com/p/B_Oaxz5oA2S/,4/20/2020,Image,3937,55,"Today, @michelleobama read one of her favorite children's books, ""The Gruffalo,"" in a live stream for all the kids stuck at home. The virtual story-time was the first in a four-week series, called “Mondays with Michelle Obama,” that the former first lady is doing in partnership with PBS Kids, Penguin Young Readers and Random House Children’s Books. “As a little kid, I loved to read aloud,” Ms. Obama said. “And when I became a parent, I found such joy in sharing the magic of storytelling with my own children — and then later, as first lady, with kids everywhere.” ",,,,,,,
https://www.instagram.com/p/B_Nbk_MhxK7/,4/20/2020,Sidecar,2116,14,"“Kids are getting more bored by the day,” according to Henry Dodd, 11, who was tapped by the Times to write about what he and his peers are experiencing during coronavirus. “We wish we could go back to school to see our friends. But some of us are also really scared about getting the coronavirus, and we don’t want our friends and family to get it either.” Their responses run the gamut of emotions: from the relief of having a flexible schedule, to fear and frustration, and — perhaps, most heartwarming — an appreciation of more time home with their families. Swipe for a small sample of what they had to say, in their own words, and tap the link in bio to read the rest of their colorful and unflinching replies.",,,,,,,
https://www.instagram.com/p/B_H08h7B_1V/,4/18/2020,Sidecar,4043,48,"For the first few weeks, @coupdegracefarris, a hospital-based doctor in New York City, tried not to miss her kids. She and her husband had sent their boys to live with their grandmother so they would not be infected. ""I channeled my blackest, stoniest heart,"" she writes. But as weeks stretch into months with no end in sight, it gets a little harder to be away from her kids, even if she knows it's the safest thing for everyone. “I’m eager to know when I can scoop them up, sniff the tops of their heads and prepare snack plates that they won’t eat.” Many thanks to Grace and all the medical personnel on the frontlines keeping us safe. You may also recognize her name from the comics she makes here on Instagram. Swipe to see her illustration of this time, and tap the link in bio to read her beautiful essay.",,,,,,,
https://www.instagram.com/p/B_FhQWAFh1L/,4/17/2020,Image,727,15,"At this point, we'll gladly take a week. Share your Tiny Victories below! ",,,,,,,
https://www.instagram.com/p/B_DiBWYhHd-/,4/16/2020,Image,1242,178,"Why your kid wants to cuddle with her toothbrush.Anyone else’s kids insist on bringing unusual things to bed, leaving their teddy bears and jilted lovies on the floor? “Some children bring a teddy bear to bed. Mine just brought a desk lamp,” wrote one parent in reddit’s r/toddlers forum. In this article, @anniegabillet delves into the psychology behind this behavior — and what you could learn if your own child is cuddling with a toothbrush.
Have you found household items in your child's bed?",,,,,,,
https://www.instagram.com/p/B_CroDmALqy/,4/16/2020,Image,740,17,"A growing number of parents on the front lines of the coronavirus are fighting to retain custody of their children amid fears of infection. Doctors, firefighters and others who risk exposure are being taken to court by ex-spouses who want to keep them away from their kids. Those who are deemed essential workers say they shouldn’t be punished for doing crucial services; their counterparts argue that the jobs pose too great a risk to other family members. Amid the pandemic, the landscape of family law, which varies across the country, has become more uneven, with few guidelines to address the current safety concerns. “This is unprecedented,” said a lawyer who works on child custody cases in Florida. “It all boils down to: How do you co-parent in a pandemic?”",,,,,,,
https://www.instagram.com/p/B_A55CWhTCX/,4/15/2020,Sidecar,538,47,"Here’s a llama, there’s a llama, and another little llama. Plush llamas. Sequined llamas. Knit llamas. If you've found toy llamas strewn all over your home, you're not alone. But, why has the industry suddenly become obsessed with these gangly, spitting pack animals? Back in February, @chavielieber visited the largest toy fair in the U.S. to find out how the humble llama rose to fame, threatening to eclipse even the beloved unicorn. Theories abound. Tap the link in bio for a very important investigation.",,,,,,,
https://www.instagram.com/p/B_APJ2aA0mp/,4/15/2020,Sidecar,1720,18,"Has your child been backsliding on potty use, or having more tantrums? It may appear that social distancing is causing them to regress, but experts say these perceived setbacks in our children’s development may have nothing to do with the pandemic at all. In this week's newsletter, @jessgrosewrites asks pediatricians and child psychologists about why big kids may be acting more like babies these days. The bottom line: While it's perfectly normal to be frustrated by the behavior, you shouldn't worry too much about it. ",,,,,,,
https://www.instagram.com/p/B--TfcChabe/,4/14/2020,Image,5961,98,"The denizens of @sesamestreet are social distancing, but the show must go on. In their new special, “Elmo’s Playdate,” which debuts on PBS Kids today, Elmo is having a virtual meet-up with his Muppet pals and celebrities like Lin-Manuel Miranda and Anne Hathaway — and it was produced entirely from the homes of the cast and crew. Here, Peter Linz, the puppeteer who has played Ernie since 2007, perches on a dolly three feet off the ground in his small home office in Westchester County, N.Y. so Ernie can get through to Bert from a spot that convincingly doubles for their apartment. “It was comforting to do something normal in a very abnormal time,” Peter said. And Sesame Street isn’t the only show helping kids understand things like germs and quarantine — Daniel Tiger, Spongebob, and The Wiggles are taking these topics on too. For the full story on how our kids’ favorite shows are adapting to this new normal, tap the link in bio.",,,,,,,
https://www.instagram.com/p/B-9qOVknq0S/,4/14/2020,Image,3015,44,"Raising a newborn as a single parent is a challenge. Add a pandemic to the mix, and it can be harrowing. In a powerful essay, @tanzinavega, the host of @thetakeaway says being isolated while on maternity leave has shown her just how fragile her support networks really are. ""When it became clear that New Yorkers were going to be asked to stay home for at least a few weeks to 'flatten the curve' of the viral spread, people began picking their quarantine groups and partners. It felt like a game of musical chairs where my son and I were the last ones standing because we couldn’t secure a seat in time."" But it hasn't been all bad, she says. Being alone with her son ""has let us bond in ways that I couldn’t have imagined.""",,,,,,,
https://www.instagram.com/p/B-76Wr1HN01/,4/13/2020,Image,642,17,"Is quarantine worse for an only child? @larimalower, a marriage and family therapist in Los Angeles, was concerned that lockdown would be especially hard on her 3-year-old son. “He doesn’t say he’s lonely, but he certainly seems isolated. Would a live-in playmate make a difference?” she wrote. Thankfully, the experts she spoke to were generally reassuring and provided helpful tips for other parents of onlies. For one, resist the (common!) urge to treat your singleton like a little adult. “You can pop them in front of the television and almost forget that you’re watching the news on Covid or a press conference they shouldn’t be watching,” Dr. Kathy Hirsh-Pasek, a psychologist, said. Tap the link in bio for more advice on how to help only children adjust to social-distancing.",,,,,,,
https://www.instagram.com/p/B-7avmphMkC/,4/13/2020,Image,6088,124,"It is a moment of joy, in the midst of crisis. Precious Anderson was admitted to the hospital with Covid-19, so severe that her baby had to be delivered by emergency C-section, more than two months early. Precious remained on a ventilator for a week after the birth — but both she and her baby survived. Here, through tears of joy, Precious meets her son David, who tested negative for the virus, over video chat. By her side is Dr. Erroll Byer Jr., chairman of the department of obstetrics and gynecology at The Brooklyn Hospital Center, whose quick action with his team, helped to save their lives. ⁣ For the past several weeks, Sheri Fink, a correspondent for the Times, and @victorblue, a photojournalist, have gotten to spend time at The Brooklyn Hospital Center, one of the hospitals that has been hardest hit by the coronavirus. Tap the link in our bio for more from their emotional story, including video, about the battles being fought and won in the maternity ward there. ",,,,,,,
https://www.instagram.com/p/B-5bu5-BBjn/,4/12/2020,Sidecar,3290,40,"As the coronavirus upends every corner of our lives, @brigidschulte says there may be one silver lining; she hopes it finally disrupts outdated beliefs about work that hold women back in their careers. ""Women are more likely to have care responsibilities, so the belief that the best work is done in the office hurts us most,"" Brigid wrote in an op-ed for @nytopinion. But now, anyone who can do their work from home — from CEOs to late night talk show hosts — is being encouraged to do so. We're all getting used to babies, kids and pets in the background of video calls and negotiating schedules to best care for our kids. Brigid thinks this moment may just usher in a new and better understanding of professionalism. Link in bio for the full op-ed.",,,,,,,
https://www.instagram.com/p/B-4W94RBvcr/,4/12/2020,Sidecar,354,3,"Some Easter joy for your feed As Christian families around the world have no choice but to get creative with their holiday celebrations, Matt Weber took things to a new level. With the help of a friend's chainsaw, he built a church in his Virginia backyard so his family would have somewhere to observe Holy Week. And, as you can see from the photo of his 3-year-old daughter, it's been a big hit. Tap the link in bio to read his beautiful essay.",,,,,,,
https://www.instagram.com/p/B-2I2t1DY-Z/,4/11/2020,Image,781,15,"They’ve played basketball, walked the dog, baked cookies, eaten cookies, FaceTimed with grandparents and painted a rainbow. Now they're bored, and maybe a little frustrated. @nytbooks rounded up the most relatable children's books for our cooped-up kids, ages 3 to 16. Tap the link in bio for the list and let us know if we missed any good ones in the comments",,,,,,,
https://www.instagram.com/p/B-zLEJ7HoQ5/,4/10/2020,Image,2127,20,"In convinced my son to teach his little sister how to do things like brush her teeth, get dressed, and sit at the table for dinner. This means he actually does those things and she is learning it from her big brother she idolizes! Sometimes they get along and it is magical. Happy #NationalSiblingsDay Share your #tinyvictories below",,,,,,,
https://www.instagram.com/p/B-w8pQ1jgiX/,4/9/2020,Image,1645,44,"What do a bouncer, kindergarten teacher, hockey referee, marriage and family therapist, and police officer all have in common? They know how to break up a fight. If your kids are squabbling more lately (or just, you know, always have), this piece by @edsullivan2 is not only the widest array of expert advice you'll find on the topic, but also extremely helpful.",,,,,,,
https://www.instagram.com/p/B-uyKq3DOav/,4/8/2020,Image,878,5,"onight is the start of Passover and Sunday is Easter. You may not have macaroons or Peeps — or the emotional and financial reserves — to celebrate in traditional ways. But, ""can you stand it if I use the word 'luckily' right now?"" @catherinewman writes. ""Because, *luckily*, Easter and Passover celebrate not only renewal and rebirth, but also a certain scrappiness and resilience, a certain indomitability of spirit. Hope and life triumphed over death and fear!"" With that in mind, Catherine rounded up ways to make this week feel warm and special and connected, without the extra shopping and prepping that would surely push us all over the edge.✡️ Happy Passover to everyone celebrating. Link in bio for the tips. Please share your own below!",,,,,,,
https://www.instagram.com/p/B-uQy4bhJ0W/,4/8/2020,Image,2580,82,"Crying in your car counts as self care. Things are really tough right now, and with near-constant kid contact, it may feel like there's no time or space for you. In this week's newsletter, @jessgrosewrites shares where she's found solace, including, yes, alone in the car. The “in between transition times” we used to have to ourselves — like during our commutes, and after we dropped off our kids at school — are gone, @womensmentalhealthdoc points out. But, taking these moments to *feel* on your own is vital. Tap the link in bio to read and subscribe, and let us know where you've found peace — or even joy — in the comments below.",,,,,,,
https://www.instagram.com/p/B-sJc16BE1c/,4/7/2020,Sidecar,4831,204,"Whether or not you're working from home, the struggle to get a few minutes to yourself has never been more real than right now. The good news is you can teach your kids how to play on their own. @strongasamotherbook spoke to educators and parenting coaches to find out how to keep even the clingiest of kids busy. Not only will their advice help your family weather this moment, but it will serve your kids well for the rest of their lives. ",,,,,,,
https://www.instagram.com/p/B-qE384hBUU/,4/6/2020,Image,540,15,"Should you feed your baby from a bottle, using pumped breast milk? Or should it be directly from the breast? Should a mother be separated from her baby? And if so, for how long? Currently, the advice differs depending on which organization you consult, and if you're a new mom, you may be feeling very confused and overwhelmed. @seasquared rounded up the guidance we have so far from health officials to provide answers. Link in bio to read.
#breastfeeding #coronavirus #covid19 #health #parenting #newborn",,,,,,,
https://www.instagram.com/p/B-pAusMB-2v/,4/6/2020,Sidecar,2396,69,"In this weekend's @nytbooks, @aronnelssteinke, author of the “Mr. Wolf’s Class” series, described the very real problem of a bibliophilic kid in this coronavirus moment — with an important reminder to support local bookstores (if you have the means). ",,,,,,,
https://www.instagram.com/p/B-nPo5oFVzi/,4/5/2020,Image,1788,23,"This chocolate cake only calls for a handful of ingredients, and it’s mixed and baked in one pan. That's why @margaux_laskey, a senior staff editor for @nytcooking, says it's an ideal baking project to do *with* your kids. Margaux promises it's delicious on its own, but in times like these, she recommends adding a layer of buttercream frosting and a rainstorm of colored sprinkles. Plus, baking counts as science, right? ",,,,,,,
https://www.instagram.com/p/B-mfCQxBPve/,4/5/2020,Image,2478,64,"As a single mom in Bensonhurst, Brooklyn, Stephanie Cadet has struggled to navigate the past few weeks alone. Each of her kids, ages 4, 5, and 7, require a different tech setup for their schoolwork; they squabble and ask why they can’t go to the playground. “It’s 24/7,” Cadet said. “No break, no relief.” But, she’s doing it. Every day, rain or shine, Stephanie walks with the kids to pick up free lunches through the school meals program. On the way home, she points out the signs of spring — buds dotted on trees, sun hitting the sidewalk — and comforts them when they ask why people are wearing masks. This weekend, she’s adapting her son’s birthday party into a quarantine activity, with decorations she bought frantically, a dance party and games on Zoom and recorded videos from family friends. We’re in awe. Stephanie is just one of the single parents who told us about their experience helping their kids through this moment. Tap the link in bio to read more, and use the comments below to share support or your own stories.",,,,,,,
https://www.instagram.com/p/B-kqwNFBPJt/,4/4/2020,Sidecar,800,19,"When @chriscolin3000 started looking for kids in his San Francisco neighborhood to write and draw about this time in our lives, he expected a handful of families to play along. But, he used social media to get the word out and friends forwarded his idea to other friends and... ""Six Feet of Separation"" was born. Issue 1 includes poems, drawings, reviews, recipes, trivia, horoscopes (!), nature writing and service journalism. Two-year-old Elsie's piece was more of an ""as told to,"" Chris admits. But, Maddy, 9, made MADdy Libs, Ryder, 6, drew himself with his ""social-distancing hula hoop"" and Ender, 7, gave “tonight’s dinner,” linguini with meat sauce, three out of five stars. Issue 2 is now in the works. “We pay zero dollars and offer a generous benefits package featuring satisfaction, civic pride and probably some other stuff,” Colin wrote in his call for new contributors. And, “they’re already pouring in.” Link in bio to check it out.#covid #covidkindness #socialdistancing",,,,,,,
https://www.instagram.com/p/B-jwB3NHqrm/,4/4/2020,Image,478,9,"Two months ago, Thomas and Callie Mitchell, who live in Chattanooga, Tenn. with their three daughters were making plans to travel to China to finalize the adoption of a 3-year-old boy living in an orphanage. As the virus began to spread from Wuhan, the trip was called off. “At first we thought it would be just a minor setback by a couple weeks, maybe months,” Thomas said. But with the U.S. emerging as an epicenter of the pandemic, the couple expects a much longer period of uncertainty. And, they’re not alone. @bydaviddodge reported on how coronavirus is affecting adoption as well as surrogacy and foster care for families across the country, making these already emotional processes even more so. Read his full story at the link in bio.",,,,,,,
https://www.instagram.com/p/B-iMy0WhpMY/,4/3/2020,Sidecar,1891,14,"Deemed an essential worker at an Amazon fulfillment warehouse on Staten Island, where people have tested positive for Covid-19, @daniellecampoamor's partner works four days a week, 10 hours a day, while she shelters in place with their children. ""There are no masks available for him to wear. They’re running out of hand sanitizer. He recently traded a co-worker a bag of chips for a box of latex gloves,"" she writes. Their family needs the income and his insurance though. And, while she's afraid, Danielle is also immensely proud of her partner for doing this work so others can continue to practice social distancing effectively. Tap the link in bio to read her complete essay.",,,,,,,
https://www.instagram.com/p/B-hCqQVDApw/,4/3/2020,Image,469,12,"My toddler is not afraid of his shadow anymore because we all say hi shadow every day now shadow.

What were your tiny victories this week? Share them in the comments and we may feature you in an upcoming newsletter.",,,,,,,
https://www.instagram.com/p/B-fjg6qB4gR/,4/2/2020,Sidecar,2933,70,"On his son’s first day of distance learning, @jbrightphoto, a photographer and avid rock climber, added one extra activity to their home school schedule: a photoshoot. Harper, 10, just had to read with his mom, let her cut his hair and do a few other activities while Dad scrambled up the walls of their family’s one-bedroom apartment in Manhattan. “I knew I wanted to create something humorous to break from the bad news, something that reflected on our family routine at this time and also spoke to my missing the climbing gym,” Joshua said. At 46, Joshua has a pre-existing heart condition, so has had to be extra careful about not leaving home. “Intimacy is so missing,” he said, noting how hard it’s been to avoid spending time with friends. “I wanted to celebrate that too.” ",,,,,,,
https://www.instagram.com/p/B-cO1vkHgem/,4/1/2020,Image,905,28,"For anxious children (and adults, tbh), the abrupt way life has changed over the last few weeks may be scary and overwhelming. In this week's newsletter, @jessgrosewrites spoke to psychologists to get their advice for how to help anxious kids deal with the transition. One big takeaway: Just acknowledging the recent changes to their lives can feel validating, said Becky Kennedy, Ph.D., a clinical psychologist. “With young kids, you can keep an ongoing list of things that have changed and things that have stayed the same. You used to go to a school building, that has changed, but you still have Mommy tucking you in every night, that’s the same.” For more advice on how to help your anxious kids right now, tap the link in bio.",,,,,,,
https://www.instagram.com/p/B-arBgMhZKO/,3/31/2020,Sidecar,2892,101,"Since many of us are now spending more time with ur kids, here is what to do if they will not stop asking why. Why do flowers have petals? Why do we have bedtime? Why can't I have a play date? If you have a toddler, you are likely familiar with this litany of why questions. Before you jump to, 'Because I said so,' @nchaudharymd has a few tactics to try that will give everyone in the family more satisfaction. Swipe 👈🏼to read the thread, and tap the link in bio to read the full article by @nchaudharymd",,,,,,,
https://www.instagram.com/p/B-ZyRUWAdt9/,3/31/2020,Image,802,12,"If coronavirus has you considering a home birth out of fear of possible exposure, visitor limits or overrun hospitals, you're not alone. Midwives and doulas have seen an uptick in inquiries about home birth since the virus began spreading in the U.S. However, they, along with experts, are reticent to encourage pregnant people to change their plans — especially those due in the next few months. Tap the link in bio to read more.",,,,,,,
https://www.instagram.com/p/B-XopuNBOHP/,3/30/2020,Sidecar,1067,44,"Seeing empty shelves when you're looking for baby supplies can be stressful for anyone, but it's especially harrowing for people like Catie Weimer and Ethan Pack of Ogden, Utah. Catie and Ethan's 7-month-old, Arlo, relies on a specific hypoallergenic formula due to a milk protein allergy. Panic buyers in their state, and across the U.S., have cleaned out the stores of supplies, leaving families like Catie and Ethan's in a bind. If you're facing shortages of formula — or diapers and wipes — in your area, swipe left for advice on how to cope, and how to help your community. Link in bio for the full article.",,,,,,,
https://www.instagram.com/p/B-VFG1-DlDV/,3/29/2020,Image,1514,15,"Mothers have been unfairly blamed for their children's illness even in the face of public health crisis, for decades. At some point in the 19th century, the perception of who was responsible for the welfare of children changed in the U.S. from a communal effort (it takes a village, etc.) to an individual responsibility placed squarely on mothers' shoulders. In @nytopinion, @jessgrosewrites explores how, even in a pandemic, it is all too easy for mothers to blame themselves (and each other), instead of holding institutions accountable. Tap the link in bio to read her op-ed.",,,,,,,
https://www.instagram.com/p/B-SdeE3Bqjv/,3/28/2020,Image,1015,15,"Honestly, we didn't want to go to Chuck E. Cheese even before the coronavirus was around. In a special episode of The Daily, Michael Barbaro, host of the show, and Carl Zimmer, a science reporter for the Times, tried to answer this and more questions from kids. Link in bio to listen.",,,,,,,
https://www.instagram.com/p/B-SELz3hGtJ/,3/28/2020,Sidecar,1432,15,"primattoo, pictured here as a child, grew up in Saudi Arabia during the Persian Gulf War. At night, while her family crammed into the basement to wait out air raids, her mother's confidence helped them stay positive. ""Today, thanks to 'The Fiona Virus,' as our son calls it, I’m navigating a different crisis, this time in Mum’s role,"" Priyanka writes. ""The weight of work, existential dread and raising two children, all at the same time, nearly sunk me, until I realized I could just channel my mother."" Tap the link in bio to read her essay. ",,,,,,,
https://www.instagram.com/p/B-QGgbKDtnm/,3/27/2020,Image,1608,50,"All hail Shiri Kenigsberg Levi, the mom of four whose 90-second diatribe on home schooling has ricocheted around the internet. ""If I knew Victoria Beckham would put me in one of her Instagram stories, I would have gotten a blowout, put on a nice shirt, some makeup,” Shiri told @tminsberg over the phone from southern Israel. If you haven't watched her video yet (or even if you have), do yourself a favor and head to the link in bio to read our interview and press play.",,,,,,,
https://www.instagram.com/p/B-PZQKthe9D/,3/27/2020,Sidecar,1020,22,I made a school bell by filling three different sized glasses with water and hitting them with a spoon. We ring it at the start of school and between periods. It's Tiny Victories: Work From Home edition. Let us know how you're winning at home with your kids in the comments below. #tinyvictories,,,,,,,
https://www.instagram.com/p/B-M7U3zn0s1/,3/26/2020,Image,2798,54,"Spousal distancing when both members of a couple take daily alone time in order to maximize conflict while working from home. Remember when the most annoying person in your office was Steve from accounting? It seems almost quaint now. WFH with a partner can be a challenge, but @janceedunn is here to help. After all, ""I’ve personally been training for this moment for years. My husband, Tom, and I are freelance writers. For a decade, we have worked, Monday through Friday, at opposite ends of the kitchen table,"" she writes. Tap the link in bio to read her advice, along with guidance from psychologists on how to navigate this strange, new work environment. Also, for those parents who aren't new to WFH together, we'd love to hear from you about how you've made this work, albeit with the added wrinkle of kids at home too, in the comments below",,,,,,,
https://www.instagram.com/p/B-K14eLnQ0A/,3/25/2020,Image,1666,20,"Home with your kids? Writers want to help. School closings have posed a unique challenge for children's authors, who are used to reaching their readers via classroom visits and book tours, but many have found innovative ways to reach their fans anyway. Perhaps among the most recognizable right now is author and illustrator @mo.willems.studio, whose popular “Lunch Doodles” sessions on YouTube have kids across the U.S. drawing pigeons and other creatures together. To learn more about how children's authors are adapting to social-distancing (and to find some cool entertainment options for your kids), tap the link in bio to read the full article from @nytbooks.",,,,,,,
https://www.instagram.com/p/B-KUw9Nhhxh/,3/25/2020,Sidecar,1681,18,"With kids at home, away from their friends and the comforting routines of school, a question we're hearing from from many of you is: Should I be concerned about any potential long-term damage that a lengthy quarantine may have on my child? For this week's newsletter, @jessgrosewrites spoke to a psychologist, pediatrician and child advocates to try to find some answers. ""First, let’s be clear,"" she writes. ""The new coronavirus pandemic is a unique, once-in-a-lifetime situation."" But by examining studies on how things like natural disasters and war affected the long-term health of kids, Jess found some hope: with love and affection, structure and routine, we can make it through. ",,,,,,,
https://www.instagram.com/p/B-In9i3jbtB/,3/24/2020,Image,958,40,"Getting pregnant was a challenge. Then covid happened. 인증됨
Last week, the American Society for Reproductive Medicine (A.S.R.M.) issued new guidelines, advising its members to avoid starting new fertility treatment cycles; consider canceling embryo transfers; and suspend all nonemergency surgeries. For so many people who have been trying to conceive, an already emotional process, the news was devastating. “I cried,” said Caroline Haugen, who was planning to start a new IUI cycle in Michigan. “Because it feels like a negative all over again. Except we didn’t even try.” Has coronavirus forced you to postpone your fertility treatments? Tap the link in bio to read more about the A.S.R.M.'s recommendations — and if you're comfortable, share your story in the comments or via the form in our piece.",,,,,,,
https://www.instagram.com/p/B-H5iK1hzKP/,3/24/2020,Sidecar,2209,168,"How to home school during covid. Teaching is hard work, even for professionals. That’s why we asked Katharine Hill, a learning specialist at an independent school in Brooklyn, for resources, advice and sample schedules to use with little kids. But first, Katherine reminded us that school-based lessons rarely go perfectly. “Kids struggle with instructions and get frustrated, no matter how well we prepare. As families step into teaching roles, it’s crucial to treat inevitable missteps as learning opportunities,” she wrote.",,,,,,,
https://www.instagram.com/p/B-GOEJfDw4j/,3/23/2020,Image,2106,73,"Alexandra March, who's just entering her third trimester of pregnancy, wrote a beautiful essay about what being pregnant in the age of #coronavirus has been like for her. This experience, she says, is proving to be an early lesson in uncertainties and parenthood. Tap the link in bio to read her piece.",,,,,,,
https://www.instagram.com/p/B-FkG19hSiy/,3/23/2020,Sidecar,1412,35,"Johanna Moran and her husband, Terry, have created a schedule with three shifts: The morning, when Terry does child care and school for their 3-, 5- and 7-year-olds while Johanna works; the afternoon, when Mom takes over and the evening is split between them — for now. Courtney Hill had her daughters make a sign during ""art class"" last week that says: ""STOP: Mom is on a call.""Many of us are having to get creative like this. The juggle is magnified​​ for hourly wage workers, who can't just stay home. And for moms, there is an added stressor; ""They remain the chief operating officers of their households, even when they have full-time jobs,"" @jessicabennett reports. ",,,,,,,
https://www.instagram.com/p/B-DFsKmFc5V/,3/22/2020,Image,1223,57,It’s such a struggle. How are you getting your kids to (actually) wash their hands?,,,,,,,
https://www.instagram.com/p/B-Aa7yBFmdE/,3/21/2020,Image,1831,82,"Play dates, performances, vacation. Even school itself. The list of cancellations seems infinite, and telling kids about them isn't easy. @erinnemagee spoke to experts about how to help children muddle through big feelings. Tap the link in bio to read. ",,,,,,,
https://www.instagram.com/p/B99a-RyjY7P/,3/21/2020,Image,2060,57,"I have been getting my picky 4 year old to eat more veggies by having crunching contests at meals to see who can crunch the cucumber, carrot, bell pepper the loudest. Veggies intake is up! Share your #tinyvictories below! #feeding #kids #parenting #momlife #dadlife",,,,,,,
https://www.instagram.com/p/B97UvGQAtcM/,3/19/2020,Image,2968,196,"If you’ve already watched “Frozen” *and* “Frozen 2,” gotten on video-chat with your kids’ friends, and read all the books in the house, there’s another world of media to explore: podcasts. From feminist fairy tales to science lessons to daily meditations, Lindsay Patterson, who co-hosts @tumblepodcast has compiled this great list of pods for toddlers and preschoolers. Tap the link in bio for her recs, and share any favorites we may have missed below!",,,,,,,
https://www.instagram.com/p/B94s25sBgkL/,3/18/2020,Image,4104,114,"To call this a stressful time for parents would be an understatement, which is why it's important to go easy on ourselves. In this week's newsletter, @jessgrosewrites shares how running and daily yoga sessions with her kids have helped her manage her anxiety, and gathers advice from experts on other ways parents can manage stress when things get tough. One great takeaway: setting a ""worry window,"" or a limited time to indulge your anxiety each day. Link in bio for the rest — stay healthy out there",,,,,,,
https://www.instagram.com/p/B92mSN8FFgn/,3/17/2020,Image,3016,154,"Jaime Fitch, a manager at the University of Washington School of Medicine, woke up on Monday to learn that her children’s caretaker had some symptoms of Covid-19, but not enough to get tested. Her mother-in-law, who has babysat in the past, had recently been injured in a car accident. Jaime's husband also needed to work, too. So, they are doing what a lot of parents across the country are doing during school closures: multitasking, playing jiu-jitsu with their schedules and hoping for the best. But it's not coming easy. ""It is a nightmare out here,” Jaime told @seasquared for our story on how parents in Seattle, one of the first major cities to close its public schools because of coronavirus, are juggling work and child care. (Link in bio.) Are you in the same boat? Leave your best advice in the comments",,,,,,,
https://www.instagram.com/p/B910QjbArtU/,3/17/2020,Image,535,29,"Working or schooling from home during the coronavirus crisis? We want to know how you're making it work in our new normal. It could be a yoga video you did with your 3-year-old, like @jessgrosewrites did, a moment of peace you found hiding in the pantry, or an adorable ""conference"" call between kids who are friends. Share your Tiny Victories (Social Distancing Edition) below and we may feature you in an upcoming piece on the site. If you want to send along pictures, our DMs are open too! #parenting #momlife #dadlife #kids #health #coronavirus #socialdistancing #quarantine #tinyvictories",,,,,,,
https://www.instagram.com/p/B9zsaigB6cw/,3/16/2020,Image,3873,36,"Social distancing is awkward and hard, but it keeps the vulnerable safe. @drjengunter knows this firsthand — she did it for 18 months with her premature twins. ""They weighed 1 pound, 11 ounces and 1 pound, 13 ounces, respectively, and were among the most vulnerable a human can be to lung infections,"" she writes. Tap the link in bio to read Dr. Gunter's essay, including advice on how to social distance effectively.
#coronavirus #parenting #health #kidshealth #socialdistancing #momlife #dadlife",,,,,,,
https://www.instagram.com/p/B9uHo5sAg6o/,3/14/2020,Image,2155,75,"The benefits of social distancing. In all seriousness, how's everyone doing today?",,,,,,,
https://www.instagram.com/p/B9rBHsClaYO/,3/13/2020,Image,1185,12,My 3 year old treats hand washing like a competitive sport now thanks to preschool lessons. Do you have kids who are now home from school or day care? We want to hear the ways you’re getting through our new normal. DM then to us and we’ll collect the best ideas so everyone can benefit! #tinyvictories #parenting #momlife #dadlife #nytptinyvictory,,,,,,,
https://www.instagram.com/p/B9kpfq7gJag/,3/10/2020,Image,638,32,"Jared Bilski is duking it out with another guy for his wife’s affection, and in his estimation, it's not a fair fight. After all, the competition is their 2-year-old son. ""The more understandably annoyed my wife becomes with my antics ('You’re almost 40, when are you going to stop with the prank emails?'),"" he writes, ""the more enamored she seems to become with her pint-size prince in diapers. And I can’t help but feel resentful of the attention he receives, even if I find him just as enamoring."" Have you ever felt jealous of the attention your child receives from your partner? Tell us in the comments below, and tap the link in bio to read Jared's essay.",,,,,,,
https://www.instagram.com/p/B9hbcdpBWaK/,3/9/2020,Sidecar,1052,96,"Pro Tip of the Week If your sleep-trained baby suddenly stops sleeping through the night, you might feel defeated and even a little annoyed. Swipe 👈🏼 to read about why these regressions happen, and what you can do about them. #sleepawarenessweek #sleep #babies #toddlers #parenting",,,,,,,
https://www.instagram.com/p/B9et6HsBe5r/,3/8/2020,Sidecar,3505,84,"We talk a lot about emotional labor here, specifically how it's often inequitably divided in heterosexual couples. @noideadaddyblog recognizes how much emotional labor his wife does, but he also thinks it's high time he, and other involved dads, are given a chance to take on some of the load — without being overcorrected. Check out his essay at the link in bio and let us know what you think in the comments. ",,,,,,,
https://www.instagram.com/p/B9cDveGpLMT/,3/7/2020,Image,480,35,"Can elderberry treat the flu? It’s become a social media cult favorite, touted as a “miracle” remedy for a variety of pesky winter bugs: colds, flu and yes, even recently, the coronavirus. But does elderberry actually cure anything, and is it safe for kids to take? Tap the link in bio to read what doctors and experts have to say. ⁣",,,,,,,
https://www.instagram.com/p/B9ZHnlvnUJ6/,3/6/2020,Image,2250,65,"Got my toddler to take a shower by calling it a party shower. We had cake soap, presents toy wrapped in washcloth and dancing. Share your #tinyvictories below! #toddlers #parenting #momlife #dadlife #kids #nytptinyvictory ",,,,,,,
https://www.instagram.com/p/B9VMoBfHLWs/,3/4/2022,Image,1234,12,here i'll airdrop it to you,,,,,,,
https://www.instagram.com/p/B9UVTCUhjw9/,3/4/2022,Sidecar,1060,49,"If your child has ever told you they prefer their other parent over you, you know it can hurt. It can also be a welcome break if it means your partner has to do all the things. In this week's newsletter, @jessgrosewrites answers a reader's question about why toddlers go through these very normal phases. (How typical? It even happened to Cardi B. Stars, they’re just like us!) ⁣
⁣
She also shares experts' advice on how to cope when you're not in the spotlight, and how to support the co-parent getting snubbed. Tap the link in bio to read and subscribe.",,,,,,,
https://www.instagram.com/p/B9RxaRyBytO/,3/3/2020,Sidecar,698,15,"Given all the talk about #coronavirus, your kids *might* have a few questions. @jessgrosewrites shared tips from experts on how to navigate that conversation without stoking anxiety. Swipe 👈🏼 to read the thread, and tap the link in bio to read her full article. #parenting #health #kids #momlife #dadlife",,,,,,,
https://www.instagram.com/p/B9PULWRhsyf/,3/2/2020,Sidecar,2255,92,"Pro Tip of the Week Was this morning a garbage fire for you, too? Getting out the door with kids can be a major struggle, but these tips may help make things less painful. Swipe 👈🏼 to read the thread and tap the link in bio to read the full guide by @paullunderwood #parenting #babies #toddlers #momlife #dadlife",,,,,,,
https://www.instagram.com/p/B9M-4lshf8M/,3/1/2020,Sidecar,1117,10,"We debunked five common myths about money and parenting, from buying vs. renting to whether or not you need a living will. ",,,,,,,
https://www.instagram.com/p/B9HDoY7DKaG/,2/28/2020,Image,915,15,"While my 3 year old asked Alexa questions about animals and dinosaurs, I got to take a five minute shower. Five WHOLE minutes! Share your #tinyvictories in the comments below.
#parenting #toddlers #kids #momlife #dadlife",,,,,,,
https://www.instagram.com/p/B9FVkfMhzkK/,2/27/2020,Sidecar,482,4,"How do we teach our kids about the joy of being black in America in the face of so much pain? In this gorgeous essay, A. Rochaun Meadows-Fernandez writes about how she's focusing on triumphs with her kids this Black History Month. She also spoke to other parents about how they've done the same, and shares their tips. Tap the link in bio to read their wonderful ideas, and let us know how you've been celebrating Black History Month in the comments.⁣",,,,,,,
https://www.instagram.com/p/B9DLZmWj480/,2/26/2020,Image,695,49,"If you're considering canceling an upcoming trip because of recent #coronavirus updates, this reporting from @seasquared can help you make a call. Have questions we didn't address? Let us know in the comments. #parenting #travel #kids #coronavirusupdates #vacation #springbreak",,,,,,,
https://www.instagram.com/p/B9CM2_aB1wj/,2/26/2020,Image,2373,86,"“You have to talk to her all the time,” @kaitlyngreenidge’s mother said, from the moment Kaitlyn got home from the hospital with her baby. “All. The. Time.” As a self-declared “naturally silent person,” the idea of making small talk with someone who couldn’t talk back seemed impossible. But she forced herself to keep trying. In this week’s newsletter, Kaitlyn shares the piece of advice that made her come around — and what she learned about parenting and herself. Tap the link in bio to read and subscribe to our newsletter, to get NYT Parenting in your inbox twice a week #parenting #newborn #newmom #newdad #babies #momlife #dadlife",,,,,,,
https://www.instagram.com/p/B89xvmiBMXC/,2/24/2020,Sidecar,2285,45,Pro Tip of the Week You don't have to fix your relationship with your body overnight to be a good role model for your kids. Swipe 👈🏼 to read the thread and tap the link in bio for the complete article by @v_solesmith. ⁣ #parenting #momlife #dadlife #kids #health #bodyimage #bodypositivity,,,,,,,
https://www.instagram.com/p/B87Agdupcrp/,2/23/2020,Image,1271,25,"(cw: loss of a child) As @miraptacin and her husband muddled through the aftershocks of losing a pregnancy in the second trimester, many bereavement professionals warned them the divorce rates after experiencing child loss are staggeringly high. Twelve years after their heartbreaking loss, Mira shares how they healed together in a powerful essay. Tap the link in bio to read. If you’re currently grieving and would like more resources, our DMs are open.",,,,,,,
https://www.instagram.com/p/B84CTswhF1U/,2/22/2020,Sidecar,545,18,"In an already stressful time, the unexpected out-of-pocket expenses associated with a NICU stay can be crippling to new parents. Eric and Stacey Brown, whose triplets were delivered at 28 weeks and 5 days were left with thousands of dollars in out-of-pocket costs after receiving a bill for over $4 million. “Yes, your life is always turned upside down when you have a child,” said Eric, who shared these photos of his babies as newborns. “But with us, it was with the snap of a finger and a minute and a half we essentially doubled the size of our family and cut our income in half.” Tap the link in bio to read about how families have coped with these expenses, and what to do if you end up with an unexpectedly high NICU bill. #nicu #motherhood #fatherhood #preemie #preterm",,,,,,,
https://www.instagram.com/p/B81UF7CDxb4/,2/21/2020,Image,1245,56,This is just the cutest Share your #tinyvictories below! #parenting #momlife #dadlife #nytptinyvictory #toddlers #moana,,,,,,,
https://www.instagram.com/p/B8uqkCJhZ5G/,2/18/2020,Sidecar,2074,110,"Pro Tip of the Week How did you meet your closest parent-friend? While you don't necessarily *need* parent-friends to feel happy and adjusted, it can be good to have a group of people who ""get it."" For a few ways to make your search a bit easier, swipe 👈🏼 to read the thread and tap the link in bio for the full guide, written by @lyzlenz. ⁣#parenting #momlife #dadlife #momfriends #parenthood #newmom #newdad #friendship",,,,,,,
https://www.instagram.com/p/B8mcTT6BR_O/,2/15/2020,Sidecar,856,12,"Each adoption process shares the same ultimate purpose: to unite children who need families with those that want children. Yet, the price tag of adoption in the United States varies widely, from nearly nothing to tens of thousands of dollars. We asked three families (including single mom Jacqui, pictured here) about the variety of choices — and costs — involved in adopting their kids.#adoption #adoptionstory #adoptionjourney #parenthood #family #parenting #momlife #dadlife",,,,,,,
https://www.instagram.com/p/B8jHOr3ggNI/,2/14/2020,Image,2916,69,"The baby was finally down and my husband and I had some time to talk about topics other than sleeping and pooping, but I also needed to shower. Instead of cutting the conversation short, we took the rest of our bottle of wine into the bathroom, where we talked and drank while I showered. You and me ... and a bottle of wine Share your #tinyvictories below! #valentinesday #parenting #parenthood #momlife #dadlife #nytptinyvictory",,,,,,,
https://www.instagram.com/p/B8esb7NHZDF/,2/12/2020,Image,398,5,"When Tanya Brice’s mother moved into her apartment, Tanya was already caring for twin toddlers — one of whom has autism and an intellectual disability — and a teenage son. Tanya (pictured here with her daughter) is also a single mom supporting her family on a social worker’s salary, so the adjustment stressed her budget and schedule to a breaking point.⁣
⁣
Tanya is part of the ""sandwich generation,"" a group of millions of Americans who are taking care of young children and their aging parents at the same time. We partnered with @YouGov, a polling and market research company, to learn more about how these responsibilities can affect people's parenting and lives. As one person put it, ""It's pretty brutal.""",,,,,,,
https://www.instagram.com/p/B8cHl6rnlhs/,2/11/2020,Image,618,20,"""At the start, I told myself I was going to rise to the occasion and remain calm to give the kids some sense of normalcy,"" Rebecca Kanthor, a reporter currently under lockdown in Shanghai due to #coronavirus says. ""My 7-year-old daughter and 4-year-old son relish the extra attention and mostly play together happily. But, as the weeks tick by, we’re all getting stir crazy."" Tap the link in bio to read about how she and other parents in China are coping.",,,,,,,
https://www.instagram.com/p/B8ZipkTh_Rs/,2/10/2020,Sidecar,3510,152,"Pro Tip of the Week Sleep deprivation + gender dynamics are a volatile combination that can cause conflict for heterosexual couples after having kids — but it isn't a sign of the end times. Swipe 👈🏼 for tips on how to reduce fighting after baby, and tap the link in bio to read the full guide by @jessgrosewrites. #newparents #parenting #parenthood #momlife #dadlife #postpartum #relationships",,,,,,,
https://www.instagram.com/p/B8RZE3ZFaL4/,2/7/2020,Image,2300,75,Taught my kids to put laundry away. Pretended it was a pizza restaurant and they were delivering pizza to drawers. Now I want  share your #tinyvictories below! #parenting #parenthood #momlife #dadlife #kids #nytptinyvictory,,,,,,,
https://www.instagram.com/p/B8PPrGonSsr/,2/6/2020,Image,1360,17,"If you suspect someone in your life is struggling with a perinatal mood or anxiety disorder, it may be tough to know what to do. The best approach, @womensmentalhealthdoc says, is to be direct and thoughtful in your communication. You can also offer tangible help, and make it easy for your friend to say yes. ""Tell her you’d like to drop off dinner one night — does she prefer home-cooked or takeout? Or, you’d love to spend time with the baby so she can nap — does she prefer Saturday or Sunday?"" Tap the link in bio to get more tips, including when to intervene, and how to support someone while they pursue treatment.",,,,,,,
https://www.instagram.com/p/B8Mq9HqJUny/,2/5/2020,Image,1013,73,"You deserve (and probably need) a nap. This week's newsletter is an ode to the midday ""dad nap,"" which @jessgrosewrites defines as “a man passed out in the middle of any high-traffic domestic space, usually with a fair amount of ruckus going on around him.” And it is, she says, a ""great way to force equality,"" in any co-parenting relationship. Have a photo of your partner, or even better, YOU enjoying a dad nap? DM us and we might share it in our story. Link in bio to read and subscribe. ",,,,,,,
https://www.instagram.com/p/B8Ki2AHHZqM/,2/4/2020,Image,1702,16,"The summer her son Louie (the precious child pictured here) turned 3, @carolinezancan82 moved her family from the city to the suburbs. It was a long overdue change, but Louie had to leave behind the treasured friends he'd made at day care. When it came time for him to say goodbye, Caroline worried her son would have a hard time, but the way Louie handled it surprised her. ""I wished that he would be able muster even just a kernel of this much grace in walking away from all the other things he would inevitably have to walk away from in this life,"" she wrote. ",,,,,,,
https://www.instagram.com/p/B8Hi__Hh84W/,2/3/2020,Sidecar,1175,32,"Pro Tip of the Week If you find your kid hiding behind your legs often, you might be wondering how to help them overcome some of their shyness. The key is to remember shyness is not synonymous with introversion or social anxiety and is typically normal. Many kids become less shy over time. #parenting #motherhood #fatherhood #momlife #dadlife #shyness #shykid",,,,,,,
https://www.instagram.com/p/B8E8elAFM3F/,2/2/2020,Image,560,10,"As a former food editor, @sarahedigregorio hoped her daughter would inherit her loving relationship with food. ""'Eating for two' is an irritating phrase, but I saw it as the first benefit of being alive that I could share with her,"" Sarah wrote about her pregnancy. But when her baby was born 12 weeks premature, feeding was difficult in the NICU and beyond. Five years and many struggles with mealtime later, Sarah says she has had to redefine her idea of what nourishing her daughter means",,,,,,,
https://www.instagram.com/p/B8B8g8rB9gI/,2/1/2020,Sidecar,1873,63,"Why will not society let black girls be children? Parents, teachers and adults, in general, need to do better by black girls. Chiefly, they need to let them be children. In a powerful article, A. Rochaun Meadows-Fernandez writes about her experience with the ""adultification"" she faced as a young black girl, and talks to experts about why it happens on a personal and systemic level. She writes: ""There’s no shortage of identity-related curveballs thrown at black children. It’s important that we allow them to experience childhood and its related benefits for as long as possible. We owe it to black girls to challenge the obstacles in their way."" Tap the link in bio to read the whole article.",,,,,,,
https://www.instagram.com/p/B7_aTHAFvDl/,1/31/2020,Image,818,42,"It's time Share your #tinyvictories below!
#baby #toddler #parenthood #motherhood #fatherhood #momlife #dadlife #nytptinyvictory",,,,,,,
https://www.instagram.com/p/B77FOnbIAsE/,1/29/2020,Image,1710,69,"When @emmagf's 4-month-old started to show a strong preference for one hand over the other, she called her pediatrician, who swiftly sent her to a neurologist. It turned out her baby had suffered a prenatal stroke and he would need help catching up to his peers over time. For many families, this would mean life-altering expenses, but thanks to New York state's iteration of Early Intervention, a national program that helps children under age 3 who have developmental delays and disabilities, most of Emma's son's treatment has been free. Have you had a positive or negative experience with an Early Intervention program in your state? It's not the same everywhere and we'd love to hear your stories. Tap the link in bio to read Emma's full essay and get in touch with us there, in the comments or our DMs are open.",,,,,,,
https://www.instagram.com/p/B763IvpBZYf/,1/29/2020,Video,220,15,"Name that rash. An illustrated guide to your child's mysterious skin afflictions. jessgrosewrites says she is sorry in advance for how many times she used the word ""crust"" in this week's newsletter. It was necessary though. Tap the link in bio to read and subscribe!",,,,,,,
https://www.instagram.com/p/B74A9WEhPYF/,1/28/2020,Sidecar,1412,13,"As fans of Kobe Bryant mourn the athlete and his daughter's tragic death, people are grasping at memories and grappling with moments in Bryant’s complicated, legendary life. ""What is overwhelmingly clear is his dedication to his daughters and the youngest generation of athletes, both on the court and in the studio,"" Phoebe Lett, who produces and writes about podcasts for The Times, says in a piece about one of Bryant's lesser-known accomplishments — a podcast for kids called ""The Punies."" The podcast spoofed sports broadcasting to tell stories of a ragtag group of kids who play sports and learn a variety of life lessons along the way. Tap the link in our bio for Phoebe's ode to the show, including her picks for the best episodes to check out.",,,,,,,
https://www.instagram.com/p/B73O9d8hlTL/,1/28/2020,Sidecar,1008,28,"Now that there are at least five confirmed cases of #coronavirus in the United States, you might be wondering if you should worry. We broke down what parents and pregnant people should know. Swipe 👈🏼 to find out how to avoid risks of infection, and tap the link in bio to read our full article by Hallie Levine. ⁣#health #parenting #kids #parenthood #kidshealth #coronavirusoutbreak #pregnancy #pregnant",,,,,,,
https://www.instagram.com/p/B7wSa9YBjUo/,1/25/2020,Image,1485,19,"When Cassie Chambers got pregnant, she felt equipped to handle parenthood. Her mother was a retired director of a child development lab, and more than ready to help. But when Cassie was 17 weeks along, her mom was in a tragic accident and died. Cassie found herself at a painful intersection: grieving her mother as she became one herself. And yet, she says, ""Becoming a mother made me feel connected to my mom in a new way. I understood how much she loved me, because I loved my son that much.""",,,,,,,
https://www.instagram.com/p/B7tZXf_F6U1/,1/24/2020,Image,1723,49,Makin' it work Share your #tinyvictories — the parenting wins that make it all worth it — below!,,,,,,,
https://www.instagram.com/p/B7rMqBlJIHY/,1/23/2020,Image,577,2,"All of this smushy-faced cuteness comes courtesy of a group prenatal care program in the Bronx. ""It’s like an online pregnancy discussion board, but with real, in-person connection and accurate medical information. It’s routine prenatal care, childbirth class and group therapy, in one package,"" @sarahedigregorio writes. Tap the link in bio to read more about these programs and how, for many participants, they've helped make pregnancy a lot less isolating.",,,,,,,
https://www.instagram.com/p/B7oMXxJlJ-P/,1/22/2020,Image,1807,80,"Returning to work outside the home after having a baby can be a seesaw of emotions. In this week's newsletter, @jessgrosewrites shares her experience craving the freedom that came with leaving her 6-week-old baby, while also feeling the harsh pang of being away from her child. And, no matter how much you love your work, that feeling can persist, Jess says. ""There are those fleeting moments at work when I just want to run home and hug my kids, mash my face into my 3-year-old’s cold, smushy cheek after she comes in from outside.""",,,,,,,
https://www.instagram.com/p/B7mF1GFh_3n/,1/21/2020,Image,813,10,"As her son grew, @lizzieskurnick had to deal with a separate, heart-wrenching process. Her 75-year-old mother suffers from frontotemporal dementia, which has left her unable to care for herself. Lizzie writes about her son and her mother's inversely correlated journeys: ""There was a time in our lives when their interests, cognitive abilities and command of language all seemed to match exactly. When my son was 4, on a family vacation, I left out a handful of Legos on the kitchen island for him to play with. When I turned around, I found my mother next to him, snapping together blocks with the same careful concentration."" ",,,,,,,
https://www.instagram.com/p/B7i1qQYhxnV/,1/20/2020,Sidecar,1736,35,"Pro Tip of the Week Too much exposure to the news isn't healthy for anyone, and when things get especially hectic, it can be hard to shield your kids from it all. @paullunderwood spoke to experts about when and how to expose your kids to the news, and what to do if they come to you with questions. #parenting #parenthood #momlife #dadlife #kids",,,,,,,
https://www.instagram.com/p/B7gd4HElDZI/,1/19/2020,Image,2174,38,"When you hear the words ""division of responsibility"" in parenting conversations, you might think it has something to do with you and your co-parent. But actually, it's between you and your child. The compromise-driven feeding method, developed more than 30 years ago by dietician and family therapist Ellyn Satter, can help you make peace with your picky eater while still providing structure and balance at mealtime. ",,,,,,,
https://www.instagram.com/p/B7eUjsrgBvi/,1/18/2020,Image,857,122,"Until her third child was born, Jennifer Bronsnick believed exclusive breastfeeding was an obvious choice. Then, she ran into complications breastfeeding her youngest daughter.⁣⁣  “It was the most excruciating pain I had ever been in in my entire life,” she said.⁣⁣  The nurses at Jennifer's hospital encouraged her to exclusively breastfeed. She also wasn't given time away from her baby to rest: her newborn was required to stay with her 24/7 so that they could bond and form their breastfeeding relationship. Instead of feeling prepared to care for her new child, she was left feeling frustrated and exhausted.⁣⁣ Jennifer's hospital was one of 600 that participate in the Baby-Friendly Hospital Initiative: a series of strategies aimed at promoting breastfeeding. While experts are divided on the efficacy of the initiative, some advocates argue it hurts new mothers and their babies. ",,,,,,,
https://www.instagram.com/p/B7bJpXYH8WO/,1/17/2020,Image,2585,112,"Once when our 3 year old was having a screaming meltdown, my husband quickly made up that she had a crying button on her back that he could turn off to help her calm down. She immediately stopped crying and asked when he could turn it back on again. A! Crying! Button! So genius. Share your #tinyvictories in the comments below #toddler #parenthood #motherhood #fatherhood #momlife #dadlife #nytptinyvictory",,,,,,,
https://www.instagram.com/p/B7YW-sPH8cN/,1/16/2020,Image,1174,91,"Why kids fight gettin dressed. Why is getting children dressed such a nightmare, and when will the nightmare end? The answers, courtesy of @jessgrosewrites in this week's newsletter are 1) because clothing is one of the few ways small children have to express their autonomy and 2) never. It will never end. The good news? There are ways to ways to make mornings easier while still respecting your child's need for independence. ",,,,,,,
https://www.instagram.com/p/B7Q4soUh_gq/,1/13/2020,Sidecar,4865,136,"When it comes to teaching your children about health eating, it is very possible to do so without introducing them to diet culture. Pro Tip of the Week There's not much you can to do prevent your child's eventual exposure to diet culture, but you can model healthy habits for your children to try and give them a solid foundation, @v_solesmith writes. Swipe 👈🏼 to read the full thread and tap the link in bio to read Virginia's article. #parenting #healthyeating #kids #motherhood #fatherhood #parents",,,,,,,
https://www.instagram.com/p/B7OcT2inriy/,1/12/2020,Image,1129,36,"What everyone can learn from parents of big families. As fertility rates drop and child care costs skyrocket, large families are something of a rarity these days. 2018 data from the C.D.C. shows the average woman can expect to have about 1.7 children over her lifetime. In the late 1950s and early 1960s, that number was above 3.0. ⁣
 But there's a lot to be learned from the big families that do exist, @lvanderkam writes. Laura, who has five children of her own, spoke to parents of big families — including mother-of-seven Kristin Reilly, pictured — to demystify how they do it all.",,,,,,,
https://www.instagram.com/p/B7MVVkQngJG/,1/11/2020,Image,220,20,"Would you work for nothing at Disney? Ten thousand superfans applied to do just that. Only 14 of them were selected to join the Disney Parks Moms Panel. This group’s job is to help people plan trips to The Mouse’s parks, cruises and vacation clubs over the course of the year, which they kicked off with a training in Orlando that included exclusive tours and sneak peeks. “My kids are going to be so jealous,” Aena Drone (pictured here with Tamela Hansen and Allyn Bennion) told @tariro_ who tagged along.",,,,,,,
https://www.instagram.com/p/B7I-N16DP0H/,1/10/2020,Image,585,19,"I played the William Tell overture and challenged the kids to get ready before it ended. That's about 12 minutes — not bad! Share your #tinyvictories with us in the comments below!
#parenting #parenthood #momlife #dadlife",,,,,,,
https://www.instagram.com/p/B7HJhGVh4My/,1/9/2020,Image,2976,36,It is not about reading all the parenting best sellers or signing your kids up for all the right activities. You do not even have to exactly know what you are doing. Just show up.  Love this essay from @drdansiegel and @tinapaynebryson about how to make your kids feel seen.,,,,,,,
https://www.instagram.com/p/B7EJKMqgIoj/,1/8/2020,Image,1719,21,"If parents think that failure is shameful, their children are more likely to be derailed by mistakes. Praising your child for their accomplishments is one of the most intuitive things a parent can do, but research suggests how you handle their failures is just as important. In this week's newsletter, @jessgrosewrites shares advice and scripts to effectively praise your kids, *and* get them comfortable with failures big and small.",,,,,,,
https://www.instagram.com/p/B7CXq28lQDC/,1/7/2020,Image,3293,40,"The Canadian government has, historically, pressured pregnant Inuit women living in remote areas to travel hundreds of miles to give birth in hospitals. Now, as the country tries to make amends for its treatment of its Indigenous population, a new maternity clinic in the town of Inukjuak is being heralded as an example of a way forward. ⁣⁣Today, three out of four pregnant women in the town give birth there, attended to by Inuit midwives. “I feel relieved to be able to give birth at home, where my family is,” Susie Mina, the new mom pictured here with her mother and new son, told @photobracken and Megan Specia for their piece about the clinic. Tap the link in bio to read the full story and see more photos.",,,,,,,
https://www.instagram.com/p/B6_kOyHA4x4/,1/6/2020,Image,1152,62,"9 to 12 months the age when babies develop object permanence. It may be harder to wean them off off their pacifier after this milestone. Pro Tip of the Week 🍭 If you're trying to get your baby to kick the pacifier habit, most experts agree it's best to wean them between the ages of 1 and 3. Some say to do it on the earlier end of that range because babies develop object permanence by a year. After that, the process becomes harder, Dr. Lori Feldman-Winter, a pediatrician, says. On the other hand, you can help an older toddler understand why binky is going away — and what she can do for comfort instead. Either way, there are common strategies to pull the plug. ",,,,,,,
https://www.instagram.com/p/B65vHfXAtwS/,1/4/2020,Image,984,21,"johnmulaney's foray into kids' entertainment begins, oddly and yet perfectly, with a quote from one of the Real Housewives: “Do you know who tells the truth? Drunks and children.” The hour-long Netflix special is packed with dark humor in the form of sketches that meet kids where they are, but never condescend or underestimate their intelligence, @zinomanj writes. Did you watch with your kids? What did they think? Tap the link in bio to read Jason's review.",,,,,,,
https://www.instagram.com/p/B628pxQhRWY/,1/3/2020,Image,586,20,"Babies are fascinated with remotes. To keep my daughter from turning off the big game, I showed her how to sing into it like a microphone. She is a toddler now and it is still going strong. The buttons even make our voices go up or down. This volume button hack deserves a Nobel prize. Share your #tinyvictories below! #babies #toddlers #parenthood #motherhood #fatherhood #parenting #momlife #dadlife",,,,,,,
https://www.instagram.com/p/B61jjiEBRhO/,1/2/2020,Image,1194,63,"After her own difficult experience giving birth, @domino_kirke became a doula and founded @carriagehousebirth. Her goal is to empower people to ask for what they need during the most important moments of their lives. “I knew there was so much more I could have received emotionally during my labor,” Domino writes. ""A provider who doesn’t set off every warning bell in your body will be a game-changer for your birth experience."" She believes you should fully vet those who will be in the room when you have your baby, and be unafraid to raise challenging questions.",,,,,,,
https://www.instagram.com/p/B6v-VwnAUfp/,12/31/2019,Image,2889,51,"Do something that scares you everyday. In 2020, I will confront the mandoline. Happy new year! Thanks for braving year one with us!",,,,,,,
https://www.instagram.com/p/B6s-A1WBJj8/,12/30/2019,Image,1200,70,"Pro tip of the week. Crappy sleep is, unfortunately, somewhat guaranteed after having a baby. That said, there are ways to make the sleep you *do* get more restorative. Dr. Leslie Swanson, a clinical psychiatrist, recommends new parents to try to get “anchor” sleep — a four- to six-hour block of uninterrupted rest, in order to minimize fatigue and get the full benefits of sleep. That, however, can be low-key impossible for a number of reasons, including if you don't have a (supportive) partner. So, for more tips on how to get better sleep after baby, tap the link in bio to read the full guide.",,,,,,,
https://www.instagram.com/p/B6n0lY-hN6f/,12/28/2019,Image,980,14,"For parents of siblings, the post-holiday gift wars can be brutal. The good news is that with a bit of mediation from you, the seemingly nonstop bickering can decrease in frequency and severity. @melindawmoyer spoke to psychologists about how to handle conflict between your children and gave us step-by-step instructions to set kids up for smoother sailing moving forward. The first step? Lay down ground rules that prevent further fighting as the issue is being worked out. Then, obtain their consent to move forward. ",,,,,,,
https://www.instagram.com/p/B6lSzuFh4yP/,12/27/2019,Image,779,18,"BRB, throwing baby wipes all over my house. Share your #tinyvictories below! #baby #toddler #parenthood #motherhood #fatherhood #momlife #dadlife #nytptinyvictory",,,,,,,
https://www.instagram.com/p/B6gGTdpBSym/,12/25/2019,Image,1375,707,"In many ways, the 2010s felt like the decade parents couldn't win. ""[It] is embodied in a single indelible image: a parent awake in the middle of the night, pinched face illuminated by the glow of her phone, flagellating herself with the judgment of other moms and dads,"" @jessgrosewrites says in today's newsletter. ""The facile response to this is to tell people to get off the internet, but that’s not a realistic recommendation, and it fails to consider the benefits of connection and empathy that are the upside of all this sharing."" ⁣So today, as many of us are celebrating holidays, use our comment section to tag someone in your life and let them know how you think they ARE winning at this whole raising humans thing. We want to celebrate with you!",,,,,,,
https://www.instagram.com/p/B6d8xWLpBMU/,12/24/2019,Image,3760,70,"obscure developmental phases. Age 1 to 4 years fire truck obsession,age 1.5 to 2.5 years fascination with youtube unboxing, age 4 to 7 years exclusively eats frozen waffles for breakfast, age 0 to 100 years wants to sleep on a warm body. Snuggles are eternal ",,,,,,,
https://www.instagram.com/p/B6bYGcNBoh0/,12/23/2019,Sidecar,1562,31,"Pro tip of the Week Don't worry, we'll get through this holiday season together. According to @janceedunn, all you have to do is *loosely* maintain the three pillars of wellness — sleep, food and exercise — to help keep kids on track.",,,,,,,
https://www.instagram.com/p/B6YzJfaJBG7/,12/22/2019,Image,1703,33,"Anna Lee Beyer has three ""Road Rules"": ""Stop when we’re not having fun; remember we love each other; and breathe."" She made the rules when it was just her and her husband traveling halfway across the country to her childhood home. Now, with two daughters in the mix, sticking to them is more important than ever. ""I won’t argue with a 5-year-old about getting two Happy Meals in one day, "" Anna writes. ""Are we alive and moving east? Carry on.""",,,,,,,
https://www.instagram.com/p/B6VsMSfhcr8/,12/21/2019,Sidecar,532,50,"Isaac Larian is the inventor of L.O.L. Surprise! dolls — one of the most popular toys of the last decade. Thanks to their fame (and his previous success with Bratz), he's now a billionaire. ⁣The specific appeal of L.O.L. to children of the 2010s is the packaging. They mimic a YouTube unboxing video IRL, explains @chavielieber. Kids don't know what's inside their opaque containers, but also get a dangerously clever catalog with pictures of each doll you could find inside. ⁣⁣⁣
⁣
Chavie spoke to the man himself as well as psychologists and families besieged by L.O.L. about how this product became the dopamine hit of a generation. ⁣Link in bio for the story.⁣⁣",,,,,,,
https://www.instagram.com/p/B6TOIH0ANro/,12/20/2019,Image,331,11,"I figured out how to get my competitive 4 year old to help me with the laundry by turning it into a game. We compete against another and for each article of our own clothing we pull out of the pile and turn inside out, we score a point. Gamifying chores = genius. Share your #tinyvictories below!
#parenting #parenthood #momlife #dadlife #motherhood #fatherhood #nytptinyvictory",,,,,,,
https://www.instagram.com/p/B6Rn4g_g5fV/,12/19/2019,Image,1336,54,"What did you love reading with your kids this year? If you're looking for new ideas (or a few last-minute gifts), don't miss these picks from Maria Russo, The Times’s children’s books editor, for the most notable picture books, middle grade and young adult books of 2019.",,,,,,,
https://www.instagram.com/p/B6OEhgmHygF/,12/18/2019,Image,681,79,"Break the barf cycle! In this week's newsletter, @jessgrosewrites finds out what to do when ""the dark lord norovirus"" visits your home. One brilliant suggestion: ""Put a glow stick in the trash,” Dr. Tracey Allyson Wilkinson said. This way, if your kids need to vomit in the middle of the night, they will know where to direct it. What are your pro tips for surviving the dreaded stomach bug? ",,,,,,,
https://www.instagram.com/p/B6JXfpGgEjY/,12/16/2019,Image,262,5,"Protip of the Week The dark, bees, dogs. The triggers may change, but as many as 9 percent of children experience phobias. If yours is one of them, the first step is to help your scared kid feel safe. Then, revisit the moment. Why did they freak out when they saw the German Shepherd next door? Try to figure out what they’re worried will happen if they go near the dog. ⁣
⁣
“Children can have rather unrealistic ideas about what will happen, and it’s your job to gently correct their misconceptions,” Dr. Tamar Chansky, a clinical psychologist, says. Are they worried they’ll lose a limb, or die? Is it all dogs, or a specific kind of dog? Figure out the source of their fear so you can acknowledge why they were scared and reassure them with the facts before you move on to the next step. Link in bio for the full piece by @melindawmoyer. ",,,,,,,
https://www.instagram.com/p/B6ENiN7gS51/,12/15/2019,Image,398,9,"73% of parents said they would take on credit card debit in order to buy holiday gifts for their children. Holiday magic doesn't come cheap. ""When you’re already struggling to pay the bills, a child’s wish list can feel like a heavy burden,"" @xoxsai writes. ""But most of us will do anything to avoid disappointing our kids."" So, how can you keep your expenses — and stress level — in check? Sa'iyda got smart ideas from other parents who struggle to manage the seasonal financial burden *and* their kids' expectations. ",,,,,,,
https://www.instagram.com/p/B5_ezo2hR09/,12/14/2019,Image,2195,68,All hail the bingle-bongle Share your #tinyvictories in the comments below! #parenthood #momlife #dadlife #motherhood #fatherhood,,,,,,,
https://www.instagram.com/p/B5_DQMZhKUx/,12/12/2019,Image,1080,24,"Around her son’s first birthday, @jessicacatherineslice had a realization about parenting while living with Ehlers-Danlos syndrome. ""I needed to rethink my approach to adaptive equipment in order to parent my son the way that I wanted — to be there as he started to discover the world. A few months later, I got my first reclining power wheelchair,"" she writes.",,,,,,,
https://www.instagram.com/p/B58edDTpWoU/,12/11/2019,Image,963,23,"It's the most wonderful time of the year ... to revert to your melodramatic teenage self. If you find yourself butting heads with your family when you come home for the holidays, particularly with your mother, you can rest easy knowing we're all psychologically wired to do so. In this week's newsletter, @jessgrosewrites spoke to experts about how to deal with the often inevitable friction. ",,,,,,,
https://www.instagram.com/p/B533kxKjZSy/,12/9/2019,Image,877,20,"Over the next few weeks, we'll be publishing a series looking back at the decade in parenting. First up, Kathryn Jezer-Morton spoke to a few stars of the mom blog era about how the “mamasphere” went from scrappy blogs to multi-platform personal brands. ""New mothers in 2020 might not realize that the conversations around motherhood that they may take for granted very rarely took place in public before 2005,"" Kathryn says. ""The everyday struggles and victories of motherhood have gone pop."" Read more at the link in bio and stay tuned for more about baby names, scientific breakthroughs and books that defined the 2010s. #decadeinparenting",,,,,,,
https://www.instagram.com/p/B53fSZABNXV/,12/9/2019,Sidecar,3365,145,"Involving your baby in the family meal may seem intimidating but there are a lot of benefits to giving them a seat at the table. Guide of the Week Parents of babies, you don't have to cook three separate meals.",,,,,,,
https://www.instagram.com/p/B5xon-NjZGq/,12/7/2019,Image,313,12,"Is your child a digital addict? Does your child turn into a total monster when you try to take away their screens? You're not alone. Andrea Petersen spoke to experts about the psychological reasons our kids can't get enough of their screens, and how to make ungluing them from their devices less painful for everyone involved.",,,,,,,
https://www.instagram.com/p/B5vmbtons0x/,12/6/2019,Image,747,24,My 8 month year old son was so mesmerized watching our elderly bulldog snorting and scratching her back on the carpet that I could finally clip his fingernails without a struggle. Share your #tinyvictories below! #momlife #dadlife #parenthood #parenting #babies,,,,,,,
https://www.instagram.com/p/B5tWL1MoplP/,12/5/2019,Image,962,48,"I gave my tinder date hand, foot and mouth disease. ""This is why single mothers should not date,"" @edsullivan2 thought after the guy she'd met on Tinder caught not just pink eye, but hand, foot and mouth disease from her twin girls. Certain this brush with early parenthood would scare him away, Emily was surprised when, instead, their relationship turned into something deeper. Tap the link in bio to read Emily's essay.",,,,,,,
https://www.instagram.com/p/B5qY1WiJt5Z/,12/4/2019,Image,299,12,"I feel weird lying about santa. 
Early in her childhood, @katherine.zoepf’s mom told her that her family would no longer celebrate Christmas, because her mom was becoming a Jehovah’s Witness. In this week’s newsletter, Katherine takes over to write about how, years later, her own choice to include Santa in her children’s lives after growing up without him has involved a bit of a learning curve.",,,,,,,
https://www.instagram.com/p/B5n9L5lBYa4/,12/3/2019,Sidecar,1586,77,"""While it’s understandable that most parents are consumed with whether their children are 'falling off' their growth curves, they’re often worrying needlessly,"" pediatrician @aaronecarroll writes. ",,,,,,,
https://www.instagram.com/p/B5lTNmMgrBR/,12/2/2019,Image,740,7," Guide of the Week Keeping your house clean and organized after kids (without expensive help) is probably unrealistic. What is realistic, however, is keeping your house clean and organized *enough.* @joliekerr spoke to professional organizers about how to make it happen. A key takeaway? Minimize your stuff intake. But with the holidays coming, that might be a challenge, so remember the revolving door. ""Keep an eye out for things that aren’t working anymore, like coloring books where the pages are all filled out or sticker books that are almost empty,"" Kate Pawlowski of @doneanddonehome said.",,,,,,,
https://www.instagram.com/p/B5iS-5WHOOE/,12/1/2019,Image,735,42,"""Baby Shark"" is objectively terrible, as is most children's music, writes @paullunderwood. So why can't our kids get enough of it? In a mission to get on board with his kids' questionable music tastes — and figure out how to sneak some of his favorite artists onto their radar — Paul spoke to musicians such as @sharonvanhalen, and @corintuckerband from @sleater_kinney, along with a child psychiatrist. He also shared a playlist of his family's favorite tunes. ",,,,,,,
https://www.instagram.com/p/B5geN11nqyt/,11/30/2019,Image,280,13,"Is it too soon to give my kid a tablet? With the holidays approaching, you might be tempted to finally give in and get your kid a tablet. But should you? @seasquared spoke to experts about when to introduce a tablet, and how to decide if getting one is right for your family.",,,,,,,
https://www.instagram.com/p/B5dlBxmgYbn/,11/29/2019,Image,187,1,"It's Black Friday, otherwise known as the day the world goes into full-tilt retail madness for the next month, which can have some unpleasant effects on our kids. In this week's newsletter, @JessGroseWrites looks into how to avoid raising what she affectionately terms a ""gift monster,"" with help from @ronlieber, a finance columnist for The New York Times.",,,,,,,
https://www.instagram.com/p/B5dJT0nDB5H/,11/29/2019,Image,526,6,To generally affable 4-year-olds! Share your #tinyvictories in the comments below ,,,,,,,
https://www.instagram.com/p/B5aQBGLD7dL/,11/28/2019,Image,422,14,Navigating thankgsiving with your picky eater. Why it is really okay if you child only eats only rolls again this year. Will grandma be heartbroken when her pumpkin pie gets rejected? @v_solesmith is here to take the pressure off. ,,,,,,,
https://www.instagram.com/p/B5YbQzzFgZk/,11/27/2019,Image,586,9,"""It may take a village to raise a child, but what happens when that village decides to admonish your kid?"" That's the question @seasquared sought an answer to in advance of the holiday season, a magical time when relatives *may* start to interfere with your parenting. She spoke to family therapists and other parents to gain clarity on when — if ever — it is ok for someone else to discipline your child, and how to navigate it when it happens.",,,,,,,
https://www.instagram.com/p/B5TtHrvoRDt/,11/25/2019,Image,697,16,"hat wail echoing throughout your house in the middle of the night? It’s got an accent, according to Dr. Kathleen Wermke, a German scientist whose team at The Center For Pre-Speech Development decodes newborns’ cries. They’re helping medical professionals catch speech delays and giving parents new communication tools. Visiting Dr. Wermke’s lab also made for adorable photos like this one of her with 6-month-old baby Lara. Watch our Instagram story for more cuteness and to see how the lab works. ",,,,,,,
https://www.instagram.com/p/B5TVJ_DFLm9/,11/25/2019,Image,233,12,"Guide of the Week The holidays are officially here, and if you’re in the situation @marniehanel is in, you might be worried about carsickness. Marnie, a mom of three, spoke to a neuroscientist, a pediatric psychologist, children’s audio enthusiasts, and a professional auto detailer about how best to cope with this issue. Needless to say, she's got your back on this one. Her tip: Make small adjustments to avoid discomfort that could push your nausea-prone child over the edge. Opening a window, for example, can help convince their brain their body is in motion, which can stop the middle ear issue that triggers nausea.",,,,,,,
https://www.instagram.com/p/B5RPR1SIZee/,11/24/2019,Image,737,23,"If your child sees their grandparents mostly via an iPad due to factors like distance, health, or work — don't worry. @breeshirvell reported on what to do in these instances, and writes that video chatting really is a great way to maintain relationships. One expert said FaceTime is even better than a phone call because a young child may not be able to describe what they did in day care, but a parent can say, ‘Go get the picture you drew and show Abuela.’ But what happens in thornier situations? If your child's grandparents *won't* visit for any reason, Bridget found there are other ways for your child to have a meaningful relationship with their elders. ⁣",,,,,,,
https://www.instagram.com/p/B5NltFIn2j0/,11/23/2019,Image,2401,65,"Food writer @alexvanburen says she owes you an apology. Before she had a baby, she ""breezily"" told you you could, nay, *should* make three-course meals for your family in 30 minutes. Now that she realizes that was a tall order 😅, Alex has asked restauranteurs, chefs and cookbook authors *who have kids* how to make quality meals at home while caring for a baby. Tap the link in bio to read her article.",,,,,,,
https://www.instagram.com/p/B5Lmv6BHkh0/,11/22/2019,Image,1145,20,"Have a great weekend, and share your #tinyvictories below #toddlers #kids #parenthood #momlife #dadlife #wherethewildthingsare #kidlit",,,,,,,
https://www.instagram.com/p/B5LQYoZnW-T/,11/22/2019,Image,496,14,"""Frozen 2"" has fans of all ages excited to return to Arendelle this weekend, but many of us never left. ""Ask any parent of school-aged children what they think about 'Let It Go,' the anthem from the 2013 movie, and you will be met with instantaneous, zombielike paralysis, followed by mumblings of 'kajillion times' and a sigh of defeat,"" writes @noblemaillard, who spoke to families around the U.S. and in Britain about ""Frozen""-mania. While the younger children he interviewed are nowhere near letting (any of) it go, the big kids offered new opinions.⁣
⁣
""Anna is the funner sister because Elsa acts too proper. In preschool, people liked proper, because it’s elegant to be that, but I like sticking to my fundamentals,"" 9-year-old Zoe Toby, pictured above, says. ⁣
⁣
Or as 10-year-old Jessie-Pearl Limberger puts it:⁣⁣ ""I’m in-between on 'Let It Go.' I’d rate it as a 5 or 6. I like the song, but not Elsa’s personality. Her hairstyle and her singing voice were O.K., but I feel like she wants attention.""⁣⁣⁣",,,,,,,
https://www.instagram.com/p/B5GZb_Klqo5/,11/20/2019,Image,1028,33,"Bickering more after kids? Learn how to avoid the four horsemen of the relationship apocalypse. Let's talk about that argument you had with your partner recently. You know, the one where both of you got super defensive and / or critical and you both walked away feeling even more annoyed?
If these kinds of arguments are happening more often in your house since you've had kids, your relationship is... extremely normal. In this week's newsletter, @JessGroseWrites speaks to relationship experts about why we squabble more after kids, and how to avoid common behaviors that escalate arguments. ",,,,,,,
https://www.instagram.com/p/B5BXAcBJnVc/,11/18/2019,Image,613,38,"Guide of the Week Is there any way to emotionally prepare for parenthood? While the adage that “nothing can prepare you” is mostly true, there are some things you can do to get into the right headspace before you have kids, writes @lindshulo. ⁣If you're looking new parenthood in the eye, the first step is to manage your expectations. Dr. Darby Saxbe recommends reframing early parenthood as “a temporary period that you're expecting as opposed to a crisis that's going to destroy everything that you value.” That won't make it any less scary at first, but especially during those sleep-deprived first months, it will keep things in perspective.⁣ Tap the link in bio to read the guide, which gives actionable advice for connecting with your partner, establishing your parenting values early, keeping yourself healthy, and building a support network for when you need it most. ",,,,,,,
https://www.instagram.com/p/B4_OvpoDwIo/,11/17/2019,Image,242,3,"Yes, it's true. Your kid might love talking to Alexa and Siri, but she doesn't trust them as far as she can throw them. Judith Danovitch writes that in a recent study, ""children who were faced with a new voice-driven digital assistant similar to Siri or Alexa sometimes asked the device questions that they already knew the answers to, just to see what it would say."" How do you feel about this? Is your kid's skepticism reassuring, or concerning in our tech-driven world? Tell us in the comments below, and tap the link in bio to read the full article.",,,,,,,
https://www.instagram.com/p/B4-hTvlBOJ9/,11/17/2019,Sidecar,1246,22,"Today is World Prematurity Day, and we have @drjengunter, who regularly counsels other women about their health and pregnancies, sharing her personal experience. She writes:⁣
⁣
“My sons, Oliver and Victor, were born extremely prematurely at 26 weeks, weighing 1 lb. 11 oz. and 1 lb. 13 oz., respectively. If you looked at them now you would see two 16-year-old boys on the verge of manhood. They would look like they have done “well” and are living ‘fairly normal lives.’ But when I hear the words ‘well’ and ‘fairly normal,’ I am enraged.... The NICU is like a war zone, except the battle takes place in your baby’s body. You can do some things that are truly helpful, like holding your infant against your bare skin (kangaroo care) — although there were so many tubes and wires, it felt as if I was holding a bundle of electronics. You can also pump breast milk, but for some of us that means trying not to feel guilty when your terribly sick body can’t produce milk, so you have to abandon the effort. But mostly you just have to bear witness.” ⁣",,,,,,,
https://www.instagram.com/p/B47dSOoAniH/,11/16/2019,Image,1566,59,"Not knowing she was already pregnant, @harmancipants' father-in-law told her she would be ""courting medical disaster"" if she had a second child at 40. Her first thought: ""OK, boomer."" She also wondered if he had a point. ""Risk is a squishy concept, and it is tricky to square scientific research with one’s personal experience,"" Reyhan writes. ""But there are undoubtably certain hazards specific to what, until recently, was called a 'geriatric pregnancy.'"" To put those issues into perspective, she spoke with six experts in the field. Tap the link in bio to read what Reyhan learned.",,,,,,,
https://www.instagram.com/p/B45wksFhDvX/,11/15/2019,Sidecar,5177,68,"In her interview with @tomhanks, @taffyakner brought up parenting. “It isn’t easy being a parent, not for any of us,” he said before delivering this epic piece of advice. Then, “he looked at me for my next question,” Taffy writes. “And when he saw my face he said, ‘O.K. Go ahead. I’m right here for you, Taffy. It’s good to cry. It’s good to talk.’” And yes, now we are all crying. Tap the link in bio to read the full profile, in which the actor shares what he learned from parenting his four children, before and after fame (among other things that will make you feel less bad).",,,,,,,
https://www.instagram.com/p/B43RlbSgU5h/,11/15/2019,Image,827,18,"That thumb tastes different, huh? What was your Tiny Victory this week? Share in the comments, and we might feature you in an upcoming post. #babies #baby #parenting #momlife #dadlife #parenthood #tinyvictories",,,,,,,
https://www.instagram.com/p/B406gm6FIrF/,11/13/2019,Image,2190,426,"Cat Nguyen (@itsmecat) met the five friends she is pictured with here in their breastfeeding support group — all first time moms, all on maternity leave from demanding jobs. They became close, spending nearly every weekday at one of their houses from late morning until early evening. ⁣⁣⁣
⁣⁣⁣
“Almost everything I learned about the first year of parenting was vetted with this group of inquisitive, nerdy women, who took almost nothing at face value,” Cat told us. They would read about baby sleep and postpartum workouts together, and text advice to their group thread. They were the first people Cat left her baby with. “Because my bonds with these women formed so intensely while I was also cautiously and deeply bonding with my first born, we are forever intertwined.” ⁣⁣⁣
⁣
Who did you share the earliest days of parenthood with, whether virtually or IRL? Tag them in the comments and DM us your photos and stories for a chance to be featured.⁣⁣⁣
⁣⁣⁣
⁣⁣⁣
#parenthood #motherhood #fatherhood #momlife #dadlife #momfriends #parenting #friendship #pregnancy #postpartum",,,,,,,
https://www.instagram.com/p/B40mhCAFO4I/,11/13/2019,Image,2469,80,"In this week's newsletter, @JessGroseWrites helps a mom who asked why (seriously, why?!) her 6-year-old told his acting teacher his parents were dead and he was homeschooled WHEN NEITHER IS TRUE. Jess spoke to four psychologists to get to the bottom of why little humans are often big liars. Now, we want to hear your kids' funniest, most bald-faced lies. We received this one from @saraheszczypinski on Twitter.",,,,,,,
https://www.instagram.com/p/B4yVtV4ICmM/,11/12/2019,Image,4242,136,"In @nytopinion, @jessgrosewrites examines the tension between ideal ""Instagram-worthy"" motherhood and our actual, poop-smeared reality — a disparity that, Jess found, has existed in our culture for more than 200 years. ""Some version of the pristine influencer mother has been pushed on American women since the 1800s — and it’s always been a lie,"" she writes. ""If you look back through the diaries and journals of middle- and upper-class American women, you’ll see that they have been talking about the difficult reality of motherhood ever since the idea took hold that women were supposed to feel fulfilled by their maternal role."" Tap the link in bio to read her op-ed.",,,,,,,
https://www.instagram.com/p/B4xzgAGAWTl/,11/12/2019,Image,660,72,"Why are kids so obssessed about poop jokes? We're sharing this piece for a lot of reasons, one being how much we love this illustration by @danielhshaffer. Also, kids ❤️ poop, and there are a few *fascinating* psychological processes at play when it comes to their unrepentant attraction to potty humor. Tap the link in bio to read the article by Jenny Marder.",,,,,,,
https://www.instagram.com/p/B4vcO8qH9Zc/,11/11/2019,Image,867,23,"Guide of the Week Fighting constantly after baby? Most research shows couples are less happy after having kids, though the degree and length of unhappiness is more of an open question. ⁣One piece of advice we love came from Jennifer Senior, who suggests that those of us in relationships should make a list all of our household tasks, including child care, and divide them in a way that seems fair as opposed to equitable. For example: If one partner works 15 hours more a week than the other partner, then they will probably be doing fewer hours of house- and child-related work. ⁣ Why make a list? Because ad hoc arrangements lead to the most strife (and, in hetero couples, usually leave the mom feeling shafted). Tap the link in bio to read the full guide. ",,,,,,,
https://www.instagram.com/p/B4tFV80AuIk/,11/10/2019,Image,1350,65,"What will my grandchildren remember? ""When we think about legacy, what we leave behind as grandparents, probably values top the list: We hope we will have transmitted lessons about kindness, justice, strength and confidence, the boundless nature of love,"" Paula Span wrote in her essay exploring how much her granddaughter will remember of their time together. Paula asked experts how young children store memories, and what grandparents can do to create memories that last a lifetime. Tap the link in bio to read her piece.",,,,,,,
https://www.instagram.com/p/B4qE8EkAz-P/,11/9/2019,Image,635,0,"Women's control over fertility has as much to do with political realities as it does with individual choices, maybe even more. Fertility assistance is more advanced than ever, but most infertile people still face several unmovable barriers to getting pregnant. In her introductory essay to ""Your Fertility Now,"" a special print collaboration between us and @nytmag, @jessgrosewrites lays out how access is everything for families struggling to conceive. Tap the link in bio to read, and check out your Sunday, 11/10 paper to read the full section! #ttc #fertility #infertility #ivf #tryingtoconceive",,,,,,,
https://www.instagram.com/p/B4nEu8ZgNwD/,11/7/2019,Image,520,23,"“Do NOT eat your dinner All the dinner eaten up!"" Don't share your #tinyvictories in the comments below #preschool #motherhood #fatherhood #parenthood #momlife #dadlife",,,,,,,
https://www.instagram.com/p/B4le5F-FhYC/,11/7/2019,Image,858,31,"You can treat your postpartum depression and still breastfeed.
""Providers must weigh the potential risk of medication alongside the risk of untreated depression on the fetus and on the infant,"" @natasha.mom.md says. ""But suggesting to mothers that they should just hang on and wait for these feelings to pass is not only irresponsible, but dangerous."" ⁣
⁣
Of the 25% of mothers who are affected by postpartum depression or anxiety in the first year after giving birth, many go untreated out of fear that taking medication while breastfeeding could harm their babies.⁣ It's a precaution that, according to Dr. Sriraman, is often unnecessary.
#breastfeeding #ppd #ppa #postpartum #postpartumdepression #postpartumanxiety #nursing #newmom",,,,,,,
https://www.instagram.com/p/B4i6GBLjOrD/,11/6/2019,Image,1034,44,"The exhaustion is real. In this week's newsletter, @JessGroseWrites asks, and we quote, ""What if you're getting uninterrupted sleep and your kids are not babies and you *still* feel like a fistful of crushed-up car seat Cheerios?"" ⁣Is there a magic amount of sleep that will cure parental exhaustion? The answer isn't so simple. Tap the link in bio to read what experts had to say. ⁣",,,,,,,
https://www.instagram.com/p/B4ga--Lo_D1/,11/5/2019,Image,802,112,"Everyone knows that having a baby can ravage your sleep, but researchers are just starting to examine what happens to your dreams. @leighannhenion woke up one night clawing at the floor, desperate to save her baby from suffocating, only to find him sleeping peacefully in his crib. She was responding to a dream — something she didn't know anyone else experienced until, a decade later, she read a new study about postpartum women and ""dream-reenactment behavior."" ⁣⁣⁣ Have you ever experienced anything like this? Or noticed changes in your dreams (the nighttime variety) after having kids? Tell us about it in the comments, and tap the link in bio to read more.⁣⁣⁣",,,,,,,
https://www.instagram.com/p/B4dqP9nB0Hp/,11/4/2019,Sidecar,1760,44,"actress @caseyrosewilson knew something wasn’t right about her toddler's melancholy behavior. He didn't play with other children. ""I would often find him lying on the ground, gazing into the middle distance with such a sense of longing it made my heart physically hurt,"" she wrote. ⁣
⁣
For a long time, Casey did what some of us do when our kids are suffering and we don't know why: she blamed herself. ⁣⁣⁣""If you hadn’t been so focused on your career, you would have learned to cook beyond rudimentary fish sticks and buttered pasta! You didn’t breastfeed long enough. You got an epidural at ZERO centimeters dilated (a Cedars-Sinai Hospital first),"" she remembers thinking at the time. ⁣But, when her son had a health scare at age 3, she couldn't blame herself anymore. She trusted her gut, and the result was a life-changing diagnosis. Tap the link in bio to read Casey's essay. ⁣⁣⁣",,,,,,,
https://www.instagram.com/p/B4cyuGtDiOz/,11/4/2019,Image,214,0,"Guide of the Week Infertility is largely thought of as a woman’s issue, but male infertility can affect at least one-third of couples who are struggling to conceive. For this guide, Hallie Levine spoke to two male-fertility specialists, one ob-gyn, one infertility advocate and two men who have gone through male infertility themselves. The biggest takeaway: If you, or your partner are dealing with this, you're not alone.#infertility #fertility #ttc #tryingtoconceive #maleinfertility",,,,,,,
https://www.instagram.com/p/B4afrJTnDUp/,11/3/2019,Image,3109,110,Types of naps. Anyone else trying to do the math of when nap time should even be on this fine day of clocks changing?,,,,,,,
https://www.instagram.com/p/B4X2dmVAanI/,11/2/2019,Image,493,14,"Is it bad to take so many pictures of my kid? n our advice column on parenting in the digital age, a reader wrote in concerned that taking too many photos of her child could be giving her a complex. ""I take photos and videos of my kid all the time. She loves seeing herself on the screen. Will this affect her sense of self and make her too image-conscious in the future?""⁣⁣
⁣⁣
@seasquared spoke to developmental psychologists and other experts to determine if a well-documented childhood is a cause for concern. ",,,,,,,
https://www.instagram.com/p/B4VM5cYgMkn/,11/1/2019,Image,1596,50,"""It worked! Made me feel so smart."" Share your #tinyvictories below, and may your playground escape plans go smoothly.",,,,,,,
https://www.instagram.com/p/B4SmvddhDfr/,10/31/2019,Sidecar,333,10,"I showed my 7 year old jaws and I regret nothing. Happy Halloween! Sitting your children down to watch a scary movie tonight might seem counterintuitive, but Jason Zinoman — a comedy columnist at The Times — hopes you might reconsider, *if* you think your kids are up for it. According to Jason, showing his young daughter horror movies like ""Jaws"" and ""The Blair Witch"" was a parenting win, and that being scared in a safe space with an attentive parent nearby helped her process her emotions — particularly fear — in a way other movies hadn't before. ",,,,,,,
https://www.instagram.com/p/B4QfkE4lZ8O/,10/30/2019,Image,1027,17,"Are you ""bad at Halloween""? @jessgrosewrites identifies as such, so you won't find her laboring over homemade costumes and Pinterest-worthy decorations. While that hasn't been an issue in the past, this year, her 6-year-old is asking why Jess isn't getting crafty. For today's newsletter, Jess talked to experts about how to manage your kids' expectations of you as a parent without beating yourself up. ",,,,,,,
https://www.instagram.com/p/B4N5yWKhUNn/,10/29/2019,Sidecar,1512,41,"Misha Collins (@misha), the star of ""Supernatural,"" didn't grow up in a traditional home. His family had moved 15 times by the time he was in high school, he wrote in an essay for NYT Parenting. But, even without a home, his mom's creative cooking was a grounding force. Misha said, “Times were often lean, but one luxury we always had in abundance was food.”⁣⁣ Now a father of two with a career that takes him all over the world, Misha can't spend as much time with his kids as he would like. So when it comes to making sure his children feel loved and supported, he's making mealtime special the way his mother did for him. Tap the link in bio to read his touching piece.⁣⁣⁣",,,,,,,
https://www.instagram.com/p/B4LEmk7HKMP/,10/28/2019,Image,728,70,"Guidance of the Week Daylight Saving Time ends on Nov 3. Falling back used to mean an extra hour of sleep, but for those of us with small kids, it may mean a dose of sweet, sweet government-sanctioned sleep deprivation. Before you move to Arizona (where they've ditched DST), check out this handy chart from @drcanapari, a pediatric sleep physician and the director of the Yale Pediatric Sleep Center. Dr. Canapari shared a way to get your kids adjusted before the time change that won't leave you falling face first into your coffee for the rest of the month",,,,,,,
https://www.instagram.com/p/B4LEmk7HKMP/,10/27/2019,Image,1660,98,Which halloween parent are you? I live and die for this time of the year. Love a reason to party. I like to focus on more of a harvest theme. Wait it is october already? solid no. 4.,,,,,,,
https://www.instagram.com/p/B4I0ZkcJaC6/,10/27/2019,Image,489,3,"When @jenmaliabooks took her daughter to be evaluated for autism, she didn't expect she'd walk away with a diagnosis of her own. Being diagnosed alongside her daughter — and the negative reactions that followed — opened her eyes to how often autistic women go overlooked by doctors, and how they can struggle to be taken seriously, even by members of their own family.⁣Dr. William Mandy, a clinical psychologist, told Jen that in a 2016 study he did of 14 women, “many told us that the fact that their autism went unrecognized for so long had a very real and negative impact upon their mental health.” Other autistic mothers Jen spoke to shared similar experiences.⁣",,,,,,,
https://www.instagram.com/p/B4IEQNoje4I/,10/26/2019,Image,2431,75,"poojalakshminmd, a perinatal psychiatrist, says the pressure on parents to engage in ""self-care"" is only stressing us out more. As she points out, scheduling a manicure is no substitute for drawing healthy boundaries and a *realistic* to do list. ",,,,,,,
https://www.instagram.com/p/B4FfjWQjd98/,10/25/2019,Image,390,19,"How to stay sane about halloween candy. Halloween candy is seemingly everywhere, but Virginia Sole-Smith (@v_solesmith) has some good news — there’s generally no need to freak out about what the kids can eat. ""I once witnessed a harried mother threaten to cancel trick-or-treating if her 3-year-old failed to consume enough 'real' food first,"" Virginia wrote. ""Spoiler: The child screamed, the broccoli went untouched and trick-or-treating commenced as scheduled."" ⁣⁣
According to the doctors and nutritionists Virginia interviewed, Milky Way-induced madness isn't actually worth your time. Also, you can feel free to take your kid's Reese's cups (with permission). Tap the link in bio to read about how to approach your kid's candy haul in a way that's healthy for everyone involved. ⁣⁣",,,,,,,
https://www.instagram.com/p/B4D4hbhFnVv/,10/25/2019,Image,1092,36,Share your #tinyvictories with us below. Have a great weekend!,,,,,,,
https://www.instagram.com/p/B4AV872gyjZ/,10/24/2019,Image,515,22,"
In our advice column on parenting in the digital age, a reader asks if her constant phone use is hurting her kids. ""As the mom of a 2.5-year-old, I am often angry at 'experts' who want me to limit my 'screen time' in front of my kid,"" she wrote. ""How is reading a recipe from a cookbook, reading the paper from a physical copy, listening to music via a CD player or answering a corded phone better? Should we go back to being Luddites?""⁣
⁣
To get an answer, @seasquared spoke to a researcher studying digital disruptions and the ways in which technology affects families and children.",,,,,,,
https://www.instagram.com/p/B3-vDMahMeo/,10/23/2019,Sidecar,496,14,"Baby Elijah's lips were turning blue from lack of oxygen in the blood when his mother, Kristin Johnson (pictured), rushed him to an emergency room in Houston last month. Only after he was admitted to intensive care with a respiratory virus did she find out he'd been dropped from Medicaid coverage, joining a growing number of kids around the country with no health insurance. ⁣
“I’ve been on this emotional roller coaster,” Kristin, 34, told Abby Goodnough and Margot Sanger-Katz for their story about the climbing rate of uninsured children. “It’s been a very scary month.”⁣
⁣",,,,,,,
https://www.instagram.com/p/B39qN7ZAi0A/,10/23/2019,Image,863,14,"In this week's newsletter, @brokenbrownegg, the founder of an infertility website and community centered on the experiences of women of color, shares her experience with lasting trauma after infertility, and reminds others dealing with similar pain that they are not alone.",,,,,,,
https://www.instagram.com/p/B37nz-kAKko/,10/22/2019,Video,59,1,"You may have seen ads for baby products claiming to be safe for your child's ""biome."" But what even *is* a microbiome, and do you really need to protect it? @seasquared spoke to evolutionary biologists, doctors and researchers about the potential benefits of these products, and why a little skepticism is warranted.#baby #babies #parenting #childrenshealth #postpartum #newborn #newbaby",,,,,,,
https://www.instagram.com/p/B37M8elnpqv/,10/22/2019,Image,1134,14,"When 6-year-old Vivian Lord from Little Rock, Ark. realized her toy soldiers were all male, she asked her parents why. There are women in the military, she told them, so why aren't there female toy soldiers? With help from her parents, she sent a letter to three toy companies demanding change. That letter spurred widespread media coverage, and one of those companies actually listened.",,,,,,,
https://www.instagram.com/p/B34ngmAg_rr/,10/21/2019,Image,363,7,"Guide of the Week ""For kids and their families, food allergies change everything, from birthday parties and eating out to school snacks and sporting events,"" Alice Callahan writes. Research has estimated that about 8 percent of children in the United States — some 5.6 million kids — have a food allergy. So if your child isn't one of them, chances are, one of your friend's kids very well might be. Alice spoke to allergists and doctors about how to reduce your baby's risk of food allergies, how to interpret an allergy test, and what to do if someone near you has a reaction. ",,,,,,,
https://www.instagram.com/p/B3z5WaeA0vI/,10/19/2019,Image,436,1,"(cw: pregnancy loss) The moment when you're physically capable of having sex after a miscarriage and the moment when you're emotionally capable might be two very different times — and that's completely normal. @ihadamiscarriage , a psychologist specializing in women’s reproductive and maternal mental health, spoke to birth parents and doctors about how to navigate what can potentially be a rocky return to intimacy after loss. ",,,,,,,
https://www.instagram.com/p/B3xPtdCBUH-/,10/18/2019,Image,937,42,"“This is now what he wears to day care every single day,” Kathryn said. Of course. Share your #tinyvictories below ",,,,,,,
https://www.instagram.com/p/B3uUcoIB5XQ/,10/17/2019,Image,983,12,"From helping paint a nursery, to handling night feedings at 2 a.m. on school nights, @angely_mercado experienced the nonstop demands of parenting early on in her own life. But she's not a mom. She met her ""first baby"" at 11-years-old, when a neighbor got pregnant and needed help. Over the years, she cared for more kids, including a set of three nephews. ""Most people from working-class communities don’t have nannies. But they have people like me,"" Angely wrote in a touching essay about being a part of her community's ""village,"" developing lifelong relationships with the children she helped raise and lessons learned along the way.",,,,,,,
https://www.instagram.com/p/B3sneXIB5B8/,10/16/2019,Image,542,2,"Brandy Powell is a single mother of five. She's also a long-time hourly retail employee, and the unpredictable nature of her work schedule has made caring and providing for her children almost impossible over the years due to reduced hours and last-minute shift changes.⁣⁣⁣⁣
⁣⁣⁣⁣
“I would go to food banks, churches to survive, and it was embarrassing but I had to do it,"" she told Claire Cain Miller, the Families and Gender correspondent for @nytimes @theupshotnyt
⁣⁣⁣⁣
Brandy isn't alone. In a survey of 4,300 workers with children 15 and younger by the Shift Project, parents — especially Hispanic and black parents — described ""going hungry, not being able to pay bills, scrambling to arrange child care, losing housing, losing sleep and feeling stressed and unhealthy"" due to unpredictable hours. They also reported higher rates of negative behavior in their children, and less money and time for family meals, playing with their children, or helping them with their homework⁣⁣⁣.⁣ Legislation may soon be coming to help parents like Brandy regulate their work schedules. Tap the link in bio to read the full article. ⁣⁣⁣",,,,,,,
https://www.instagram.com/p/B3sK_NUluCW/,10/16/2019,Image,565,32,"So you have got a little headbanger.
It's time for ""Is This A Thing?"" our occasional series explaining why certain things seem to happen to your kid (or to your body or to your relationships). For today's newsletter, @jessgrosewrites asked experts to answer one question several of you sent us: ""Is it normal that my baby likes to hit his head?"" The short answer is that the behavior, while often troubling to watch, actually serves multiple (fascinating) purposes. Tap the link in bio to read and subscribe. #parenting #momlife #dadlife #baby #toddler #newborn",,,,,,,
https://www.instagram.com/p/B3pRrAegqeK/,10/15/2019,Image,1456,39,"The bond with your baby is supposed to be magical and instantaneous, or so @janceedunn once thought. But when the nurse asked her if she wanted to hold her baby after a tough emergency c-section, she didn't feel what she'd hoped she would.⁣ Jancee wrote:⁣⁣
⁣⁣⁣
""All I wanted to do was lurch off the operating table and hide somewhere. 'I can’t do it,' I croaked. The nurse nodded, and put Sylvie into the eager arms of Tom, who fell swooningly in love. As I recovered in the hospital and then returned home, I expected that at any minute, my maternal feelings would flow, and we’d resemble the enraptured moms and babies I saw in diaper cream ads. Instead, for the first few weeks, I felt the same fuzzy disconnect as I held and fed her."" ⁣⁣⁣
⁣⁣Jancee isn't alone. She spoke to experts and moms about what's ""normal"" when it comes to bonding with your baby, and how important it is to ditch the guilt.  #postpartum #parenthood #momlife #dadlife #motherhood #fatherhood #newbaby",,,,,,,
https://www.instagram.com/p/B3nQVtEB83L/,10/14/2019,Image,1796,54,"have a baby and still want to get things done?Guide of the Week Who here has a to-do list you think you'll only get through with more time, more sleep, better child care, and on and on? @lvanderkam, a time management expert, says you can wrangle that list to fit work, family time, leisure and even sleep into the 168 hours we all have each week. ⁣⁣⁣⁣ It's easier said than done though, which is why Laura gives a few key tips for how to maximize your time, including staying flexible (sort of required when dealing with children anyway) and developing a strong sense of prioritization when it comes to what you and your family want to achieve. Tap the link in bio to read. ⁣⁣⁣⁣",,,,,,,
https://www.instagram.com/p/B3kcp8JHoPN/,10/13/2019,Image,2306,26,"When the struggle to regain intimacy after having children goes on for months — or even years — and the well-meaning but often unhelpful advice of ""Just have a date night!"" gets *really* old, it's time to try something different. ⁣@seasquared talked to experts about the many ways to stay close to a spouse or partner, despite the stresses and frustrations of parenthood. Tap the link in bio to read, and feel free to share your tips and stories in the comments below.",,,,,,,
https://www.instagram.com/p/B3h3-q9BlBE/,10/12/2019,Image,427,3,"
@bawthewriteher and her partner @nikkimia85 are a queer couple pursuing assisted fertility. While waiting to find out whether their first embryo transfer was successful, they discussed how their life experiences would influence their parenting choices, and we loved this part of the conversation: ⁣⁣⁣⁣
⁣⁣⁣⁣
B.A.: ""How do you think being a daughter of a single mother is going to impact your parenting?"" ⁣⁣⁣⁣
⁣⁣⁣⁣
Nikki: ""It’s going to encourage me to check myself and make sure that I’m not overcompensating because I’ve only seen an example of one parent doing it all. I’m married to you, and you are a great partner and will be a great parent. I don’t need to overcompensate."" ⁣⁣⁣⁣
⁣⁣⁣⁣
\
⁣⁣
⁣⁣
#parenthood #lgbt #motherhood #samesexparents #lesbianmoms #ttc #ivf #lgbtq #queerparents",,,,,,,
https://www.instagram.com/p/B3fZfuDJs-t/,10/11/2019,Image,648,27,Share your #tinyvictories in the comments below. ⁣⁣,,,,,,,
https://www.instagram.com/p/B3cxxo-h73s/,10/10/2019,Sidecar,511,0,"As parents across the U.S. struggle to afford child care in 2019, it's hard to believe we saw something close to universal child care almost a century ago. During WWII, hundreds of thousands of mothers who were suddenly forced to enter the workforce had access to federal- and state-funded child care centers. ⁣""But it took a bloody global war, and its production demands on the country’s workforce, for the United States to make such meaningful provisions for working parents,"" @lydiakiesling wrote for @nytarchives, also pointing out that the centers primarily benefitted white women and were quickly eliminated after the end of the war. It was, she says, ""a gesture toward"" universal child care. ⁣",,,,,,,
https://www.instagram.com/p/B3Z69Pyhfce/,10/9/2019,Sidecar,801,41,"How children evolved to whine. One of the earliest mentions of whining in The New York Times was in a 1941 article by Catherine Mackenzie entitled ""Fifty Seven Ways Of Being Bad,"" about a survey sent to Midwestern parents asking them to detail their children's bad behaviors — whining being among the most notable. But WWII era parents weren't the first to deal with this annoying habit, and we all know they aren't the last. In this week's newsletter, @JessGroseWrites spoke to experts about the evolutionary origin of whining (monkeys do it too!) and, more importantly, how to make it stop",,,,,,,
https://www.instagram.com/p/B3XkojsFoN9/,10/8/2019,Image,1413,143,"We need to talk about the giving tree. 인증됨
Love it or hate it, ""The Giving Tree"" is often held up as the quintessential children's book about generosity. But according to @adamgrant and @allisonsweetgrant, it's a book about self-sacrifice — a very different thing. ⁣
⁣⁣
""To some readers, the tree’s act of sacrifice seems noble, like the unconditional love a parent gives to a child. But if you assume the story is about generosity, it’s easy to learn the wrong lessons: that it’s O.K. for a child to take selfishly, and that adults should give until it hurts — and keep giving until they literally have nothing left to offer,"" they write. ⁣",,,,,,,
https://www.instagram.com/p/B3VN3C_hH2v/,10/7/2019,Video,6859,8,"Johnson & Johnson has marketed its powder as gentle enough for your baby, made from talc mined from the earth. Could a product sold as the essence of purity be making people sick? #TheWeeklyNYT — a new TV series from @nytimes — asks the experts and the lawyers. Tap the link in bio to watch. Video via @theweekly @nytimes @fxnetworks and @hulu.",,,,,,,
https://www.instagram.com/p/B3U6KhrFbjn/,10/7/2019,Image,752,35,"Guide of the Week While estimates vary, pre-eclampsia affects about 3 percent of pregnancies in the U.S. Doctors aren't sure what causes the condition, but they know the signs and symptoms. For example, swollen ankles are one of the tell-tale symptoms and high blood pressure is a clinical sign. Amanda B. Keener spoke to three doctors who research pre-eclampsia to find out how to spot it, who’s most at risk and how it’s treated.",,,,,,,
https://www.instagram.com/p/B3Pax_CDEay/,10/5/2019,Image,909,31,"Giving birth landed me in the psych ward
Postpartum psychosis is rare (it affects one to two people for every 1,000 deliveries), but it's harrowing. @lisaaabramson wrote about her experience: ""Throughout those early days of motherhood, I’d travel in and out of a dreamlike state. At times, I felt normal and could vaguely sense that something 'weird' had been going on. Other times, the dream turned into a nightmare and I became convinced the walls were talking to me, my house was bugged and a SWAT team was on the roof preparing to take me away for a crime I did not commit."" ⁣
⁣
After recovering and not experiencing postpartum psychosis again with her second pregnancy, Lisa hopes to break down the stigma around this condition by sharing her experience. Tap the link in bio to read. ⁣If you're experiencing difficulties with your mental health during or after pregnancy, you can call the Postpartum Support International hotline at 1-800-944-4773.⁣
⁣",,,,,,,
https://www.instagram.com/p/B3M197WAeER/,10/4/2019,Image,1482,40,Happy weekend! Share your #tinyvictories in the comments below. ⁣,,,,,,,
https://www.instagram.com/p/B3KspoiFfgR/,10/3/2019,Image,1733,3,"""Type B"" parents unite. Brianna Bell owned up to her own ""laissez-faire tendencies"" and talked to experts about how a bit of parental disorganization can, in fact, positively affect children down the line. Tap the link in bio to read.",,,,,,,
https://www.instagram.com/p/B3If41TA3LY/,10/2/2019,Image,503,15,"If you've spent time in online infertility communities, you may have noticed (or used) the 🍍. As @TaylorLorenz wrote for @nytimesfashion, this little pineapple has become a powerful symbol of hope for people going through I.V.F. and other treatments. From the piece: ""Women arrive for egg retrievals wearing pineapple leggings, T-shirts and dresses. They jot down notes in pineapple-covered notebooks and binders. Some use pineapple cookie jars and boxes to store I.V.F. medications, and ease the pain of daily injections with pineapple-shaped ice packs.""⁣ ⁣⁣ But how did a fruit become a beloved symbol and de-facto call sign of the infertility community?",,,,,,,
https://www.instagram.com/p/B3HzW1jAtkV/,10/2/2019,Image,908,27,"There's no one way to feel about pregnancy loss. In this week's newsletter, @jessgrosewrites shared her experience with miscarriage, and the spectrum of emotions that followed. This month is pregnancy and infant loss awareness month, and if your family has experienced any kind of loss, we're here for you.",,,,,,,
https://www.instagram.com/p/B3F-i-jj_j1/,10/1/2019,Image,246,54,"Should pregnant women avoid zantac? Given recent news that samples of Zantac contained low levels of a cancer-causing chemical, you might be wondering how best to relieve pregnancy heartburn. Because if there is one thing we know happens during pregnancy, it's heartburn. @seasquared spoke to experts about the risks surrounding Zantac, and rounded up other tried and true methods for relief. Tap the link in bio to read. ⁣",,,,,,,
https://www.instagram.com/p/B3Fa7PRheys/,10/1/2019,Image,1114,35,"taylor.tepper's baby is the adorable love of his life, and the inspiration behind his new budgeting system. After Taylor and his wife welcomed her, expenses just seemed to pile up. ""The never-ending credit card swipes made me feel as if I’d never again have control over my finances,"" he wrote in an article for @wirecutter. So Taylor did what any finance writer worth his salt would do: came up with a brilliant hack to get his family's spending under control, leaving enough left over to start saving for a new home. Tap the link in bio to read how he did it",,,,,,,
https://www.instagram.com/p/B3Cpp-nA3Wf/,9/30/2019,Image,984,233,"Guide of the Week: Pregnant folks, don't sleep on getting your flu shot! Though no one wanted to touch a pregnant person with a vaccine 30 years ago, they're now considered indispensable lifesavers for both birth parent and baby. “The climate for maternal immunization is totally different than what it used to be,” Dr. Kathryn Edwards, M.D. told @tarahaelle, who reviewed five dozen scientific studies and spoke with four experts about what vaccines you need during pregnancy.⁣⁣#pregnancy #health #flushot #maternalhealth #pregnant",,,,,,,
https://www.instagram.com/p/B2_9-4Ngud4/,9/29/2019,Image,927,31,"lizamonroy and Jason Warehouse wanted to photograph the moment when they introduced their newborn daughter to their 30-pound potbellied pig, Señor Bacon. The pig, unfortunately, was not impressed. As our guide to introducing pets and babies says, it’s best to plan a calm meet-cute. Fortunately, no pigs or babies were harmed in this meeting. And we're thankful for the resulting adorable pics. We're looking for more sweet stories and photos of babies and their fuzzy siblings — and they definitely don't just have to be cat or dog.",,,,,,,
https://www.instagram.com/p/B290vEeFGaw/,9/28/2019,Image,637,32,"The school year is in full swing, so our friends at @nytcooking put together a collection of lunch recipes your kid might actually eat. Featured here are some tasty chicken ragù hand pies that are easy to make (go for store-bought pie crust to save time) *and* easy to eat. ⁣⁣⁣⁣What's your go-to lunch during the week? Let us know in the comments below and tap the link in bio for the full collection! ",,,,,,,
https://www.instagram.com/p/B260ddhl1ZN/,9/27/2019,Image,524,15,"""He smiled brightly at his toy, happily got up and went to the potty. I frequently used toys to convince him to go after that day, and it always worked,"" Alison said. ⁣What was your parenting win this week? ⁣#tinyvictories #pottytraining #toddlers #parenting #momlife",,,,,,,
https://www.instagram.com/p/B24rUB9BiMJ/,9/26/2019,Sidecar,911,12,"What does dinner look like on a typical weeknight in your household? @nytcooking asked 18 families around the world. ⁣⁣⁣⁣⁣ In Bangkok, Thailand, Wasa Khuhaprema makes dinner for her family, including her parents, with help from her two young sons. The boys cook at least once a week, and everyone is expected to clean up after themselves. In Laredo, Texas, the Garzas get weeknight dinner on their table with help from an Instant Pot. In Paris, France, Marina Pajovic Devouge serves her children leftover roasted chicken from the butcher around the corner, paired with couscous. And in Lagos, Nigeria, Wednesday night is wrap night for the Sokohs. ⁣⁣⁣⁣Tap the link in bio to see the complete project.⁣",,,,,,,
https://www.instagram.com/p/B22ESVJBtUa/,9/25/2019,Sidecar,1030,126,"Long live the lovey. In this week's newsletter, @jessgrosewrites reminds us that our children's stuffed animals, known as ""transitional objects"" among pediatricians and child psychologists, are disgusting — and very important. Jess writes, ""Transitional objects help kids move from dependence to independence, from being exclusively in the care of their families to encountering the wider world.""⁣⁣⁣⁣To celebrate these bears with broken noses and dinos with loose stuffing, we're putting out the call for photos and stories about your most well-loved loveys. Pictured here: @farahlearned's stuffed panda who, after a few decades of gathering dust, was ready for his closeup. Your turn. Does your child have a lovey with a backstory? Do you? Tell us about them in the comments. DM us with pictures! And tap the link in bio to read and sign up for the newsletter.⁣",,,,,,,
https://www.instagram.com/p/B2zheJAnG2_/,9/24/2019,Image,2120,199,"thaliaam loves to tell the story of her C-section. It was, she says, the most romantic moment of her life. ""It shouldn’t be considered bold to say your C-section was joyful, to admit to feeling empowered instead of disheartened,"" Thalia writes. ⁣
⁣
And while ⁣she acknowledges many C-sections are often traumatic, she says that stigma against the procedure — along with less than helpful glorification of vaginal birth as the ""only"" way to truly bond with your baby — can leave those who have them feeling ashamed. ⁣
⁣
Thalia hopes to hear more positive narratives around the C-section experience. ⁣⁣ Did you have one? Was it a good experience? ",,,,,,,
https://www.instagram.com/p/B2xEu3qpYhQ/,9/23/2019,Image,881,42,"74% of plastic products tested in a 2019 study contained potentially toxic chemicals. Guide of the Week ⚠️ From shower curtain liners, to food packaging, to dust — plastic is everywhere. ""But the prospect of eliminating plastics from my life feels overwhelming,"" Alice Callahan wrote in our guide to the plastics families should avoid. Seeking clarity, she spoke to four researchers, including two pediatricians, for advice. Tap the link in bio for their simple strategies to get started.",,,,,,,
https://www.instagram.com/p/B2uDNn2haED/,9/22/2019,Image,751,80,"Let's face it, kids are weird. As a parent, you might often find yourself asking ""Is this a thing?"" We want to answer that question. Post your question about weird baby or kid behavior below and our reporters will reach out to you if we choose to answer it on our site!",,,,,,,
https://www.instagram.com/p/B2rzMD_pVPH/,9/21/2019,Image,524,13,"As many as 5 to 16 percent of school-age children are affected by how they process sensory information, according to a 2013 study.⁣⁣ But so many of us still don't know exactly what a sensory issue is and what to watch for in our own kids. Meg St-Esprit talked to experts in the fields of psychology, occupational therapy and developmental behavioral pediatrics, as well as children with sensory processing difficulties and their parents to gain clarity.⁣
⁣
“We all have different thresholds that we can tolerate — the key is that it is not a problem until the sensory issues begin to interfere with their everyday lives,” Jamie Fleming, an occupational therapist, told St-Esprit.⁣ Tap the link in bio to read more about SPD and how it can manifest in children.⁣⁣",,,,,,,
https://www.instagram.com/p/B2pAlcpldoz/,9/20/2019,Image,1038,36,Share your #tinyvictories in the comments below!⁣ #parenting #momlife #toddlers #motherhood #parentingwins #momhacks,,,,,,,
[truncated: 110,470 more chars]
